# Supplementary material for: Identification of vaccine targets & design of vaccine against SARS-CoV-2 coronavirus using computational and deep learning-based approaches
Source: PeerJ. 2022 May 19;10:e13380. doi: 10.7717/peerj.13380 (PMC9124463; doi:10.7717/peerj.13380)
Supplement: Supplemental Information 5 [file peerj-10-13380-s005.xlsx]

## Sheet: Sheet1
	HTL epitope	VKNKCVNFN
Protein name	Positions	Protein sub-sequence(s)	Identity
Variants of Concern
QVO78843.1 |AY.1_surface glycoprotein [Severe acute respiratory syndrome coronavirus 2]	534-542	VKNKCVNFN	100
QXO24302.1 |AY.2_surface glycoprotein [Severe acute respiratory syndrome coronavirus 2]	534-542	VKNKCVNFN	100
QYP53795.1 |AY.3_surface glycoprotein [Severe acute respiratory syndrome coronavirus 2]	534-542	VKNKCVNFN	100
QWE58030.1 |B.1.1.7_surface glycoprotein [Severe acute respiratory syndrome coronavirus 2]	534-542	VKNKCVNFN	100
QTA94382.1 |B.1.351_surface glycoprotein [Severe acute respiratory syndrome coronavirus 2]	534-542	VKNKCVNFN	100
QRI43207.1 |B.1.351.2_surface glycoprotein [Severe acute respiratory syndrome coronavirus 2]	531-539	VKNKCVNFN	100
QUI04178.1 |B.1.351.3_surface glycoprotein [Severe acute respiratory syndrome coronavirus 2]	531-539	VKNKCVNFN	100
QWE52264.1 |B.1.617.2_surface glycoprotein [Severe acute respiratory syndrome coronavirus 2]	534-542	VKNKCVNFN	100
QUD14568.1 |P.1_surface glycoprotein [Severe acute respiratory syndrome coronavirus 2]	534-542	VKNKCVNFN	100
QXO25198.1 |P.1.1_surface glycoprotein [Severe acute respiratory syndrome coronavirus 2]	534-542	VKNKCVNFN	100
QVM66720.1 |P.1.2_surface glycoprotein [Severe acute respiratory syndrome coronavirus 2]	534-542	VKNKCVNFN	100
Variants of Interest
QTI95854.1 |B.1.427_surface glycoprotein [Severe acute respiratory syndrome coronavirus 2]	534-542	VKNKCVNFN	100
QXY16763.1 |B.1.429_surface glycoprotein [Severe acute respiratory syndrome coronavirus 2]	534-542	VKNKCVNFN	100
QRN78311.1 |B.1.525_surface glycoprotein [Severe acute respiratory syndrome coronavirus 2]	532-540	VKNKCVNFN	100
QXX43745.1 |B.1.526_surface glycoprotein [Severe acute respiratory syndrome coronavirus 2]	534-542	VKNKCVNFN	100
QWA32991.1 |B.1.617.1_surface glycoprotein [Severe acute respiratory syndrome coronavirus 2]	534-542	VKNKCVNFN	100
QYV27943.1 |B.1.617.3_surface glycoprotein [Severe acute respiratory syndrome coronavirus 2]	532-540	VKNKCVNFN	100
QXY14044.1 |P.2_surface glycoprotein [Severe acute respiratory syndrome coronavirus 2]	534-542	VKNKCVNFN	100
