# Supplementary material for: Identification of vaccine targets & design of vaccine against SARS-CoV-2 coronavirus using computational and deep learning-based approaches
Source: PeerJ. 2022 May 19;10:e13380. doi: 10.7717/peerj.13380 (PMC9124463; doi:10.7717/peerj.13380)
Supplement: Supplemental Information 8 [file peerj-10-13380-s008.xlsx]

## Sheet: Tool-Bepipred 2.0
BCL epitope as predicted by Bepipred 2.0	Length of Epitope	Antigen/ Non antigen	VaxiJen score
GQSKRVDFC	9	Antigen	1.779
YNSASFSTFKCYGVSPTKLNDLCFT	25	Antigen	1.4031		BCL epitope used in vaccine construct	VaxiJen score
SNKKFLPF	8	Antigen	1.3952		DLCFTNVY	1.8569
MDLEGKQGNFKNL	13	Antigen	1.2592
GDEVRQIAPGQTGKIADYNYKLP	23	Antigen	1.1017
SQCVNLTTRTQLPPAYTNSFTRGVY	25	Antigen	0.686
FSNVTWFHAIHVSGTNGTKRFDN	23	Antigen	0.6767
YTMSLGAENSVAYSNN	16	Antigen	0.6436
KHTPINLVRDLPQGFS	16	Antigen	0.6403
VNNSYECDIPI	11	Antigen	0.6124
DPFLGVYYHKNNKSWME	17	Antigen	0.5821
KSFTVEKGIYQTSNFRVQP	19	Antigen	0.5729
FPNITNLCPFGEVFNATRFASVYAWNRKRISNCVA	35	Antigen	0.4466
NCTEVPVAIHADQLTPT	17	Non- Antigen	0.3987
NLDSKVGGNYNYLYRLFRKSNLKPFERDISTEIYQAGSTPCNGVEGFNCYFPLQSYGFQPTN	62	Non- Antigen	0.3951
RNFYEPQIITTD	12	Non- Antigen	0.3529
ASYQTQTNSPRRARSVASQ	19	Non- Antigen	0.2556
TPGDSSSGWTA	11	Non- Antigen	0.2473
SCCKFDEDDSEPVLKG	16	Non- Antigen	0.2236
LADAGFIKQYGDCLG	15	Non- Antigen	0.2071
VNNTVYDPLQPELDSFKEELDKYFKNHTSPDVDLGDISGI	40	Non- Antigen	0.1613
EQDKNTQ	7	Non- Antigen	0.1017
PDPSKPSK	8	Non- Antigen	0.0621
ELLHAPATVCGPKKSTNLVKN	21		0.0029
RVYSTGSNVFQ	11	Non- Antigen	-0.1
KQIYKTPPIKDFGGF	15	Non- Antigen	-0.3896

## Sheet: Tool-ABCPred
Rank	BCL Epitope Sequence as predicted by ABCPred	Start position	ABCPred Score	VaxiJen Antigenecity score	Probable Antigen/ Non Antigen
14	KLNDLCFTNV	386	0.68	2.6927	ANTIGEN
10	QTLEILDITP	580	0.72	2.027	ANTIGEN
9	VSPTKLNDLC	382	0.73	1.9573	ANTIGEN			BCL epitope used in vaccine construct	VaxiJen score
16	MDLEGKQGNF	177	0.66	1.7852	ANTIGEN			DLCFTNVY	1.8569
2	QCVNLTTRTQ	14	0.8	1.7824	ANTIGEN
19	VSMTKTSVDC	729	0.63	1.6231	ANTIGEN
22	ILDITPCSFG	584	0.6	1.5391	ANTIGEN
11	TTEILPVSMT	723	0.71	1.484	ANTIGEN
2	LQYGSFCTQL	754	0.8	1.4443	ANTIGEN
18	NKCVNFNFNG	536	0.64	1.3088	ANTIGEN
5	KIADYNYKLP	417	0.77	1.2565	ANTIGEN
16	NFRVQPTESI	317	0.66	1.2412	ANTIGEN
16	TTRTQLPPAY	19	0.66	1.2001	ANTIGEN
22	GVGYQPYRVV	502	0.6	1.1915	ANTIGEN
16	YQTSNFRVQP	313	0.66	1.1866	ANTIGEN
26	CLIGAEHVNN	649	0.56	1.1765	ANTIGEN
23	YRVVVLSFEL	508	0.59	1.1494	ANTIGEN
1	STFKCYGVSP	375	0.81	1.104	ANTIGEN
7	EVRQIAPGQT	406	0.75	1.0655	ANTIGEN
14	LGVYYHKNNK	141	0.68	0.9727	ANTIGEN
13	SNKKFLPFQQ	555	0.69	0.9488	ANTIGEN
17	ITPGTNTSNQ	598	0.65	0.941	ANTIGEN
13	CALDPLSETK	291	0.69	0.9226	ANTIGEN
8	NVTWFHAIHV	61	0.74	0.9051	ANTIGEN
29	IGINITRFQT	231	0.52	0.8941	ANTIGEN
15	ITNLCPFGEV	332	0.67	0.8724	ANTIGEN
17	SVAYSNNSIA	704	0.65	0.8557	ANTIGEN
24	SKTQSLLIVN	112	0.58	0.8487	ANTIGEN
13	PQGFSALEPL	217	0.69	0.8327	ANTIGEN
14	AYTMSLGAEN	694	0.68	0.8326	ANTIGEN
3	IGAGICASYQ	666	0.79	0.8225	ANTIGEN
10	GVYFASTEKS	89	0.72	0.8053	ANTIGEN
9	NLDSKVGGNY	440	0.73	0.7882	ANTIGEN
17	NFNGLTGTGV	542	0.65	0.7827	ANTIGEN
15	SNVFQTRAGC	640	0.67	0.7569	ANTIGEN
17	YGFQPTNGVG	495	0.65	0.7293	ANTIGEN
17	SIAIPTNFTI	711	0.65	0.7149	ANTIGEN
14	WNSNNLDSKV	436	0.68	0.7059	ANTIGEN
13	KSTNLVKNKC	529	0.69	0.7023	ANTIGEN
15	ETKCTLKSFT	298	0.67	0.6923	ANTIGEN
14	KHTPINLVRD	206	0.68	0.6867	ANTIGEN
9	LALHRSYLTP	242	0.73	0.6697	ANTIGEN
14	GVLTESNKKF	550	0.68	0.6528	ANTIGEN
23	RDIADTTDAV	567	0.59	0.6138	ANTIGEN
15	VYAWNRKRIS	350	0.67	0.6137	ANTIGEN
15	AAYYVGYLQP	263	0.67	0.6073	ANTIGEN
11	YNENGTITDA	279	0.71	0.602	ANTIGEN
30	FELLHAPATV	515	0.51	0.5982	ANTIGEN
27	SNLKPFERDI	459	0.54	0.5791	ANTIGEN
15	NTQEVFAQVK	777	0.67	0.5676	ANTIGEN
19	GTITDAVDCA	283	0.63	0.557	ANTIGEN
11	RRARSVASQS	682	0.71	0.5522	ANTIGEN
27	LGAENSVAYS	699	0.54	0.5507	ANTIGEN
15	CVIAWNSNNL	432	0.67	0.5242	ANTIGEN
26	SFTRGVYYPD	31	0.56	0.5224	ANTIGEN
2	YFPLQSYGFQ	489	0.8	0.5043	ANTIGEN
20	DGYFKIYSKH	198	0.62	0.4989	ANTIGEN
8	NNSYECDIPI	657	0.74	0.4879	ANTIGEN
7	TWRVYSTGSN	632	0.75	0.4797	ANTIGEN
17	QVAVLYQDVN	607	0.65	0.4619	ANTIGEN
19	SLLIVNNATN	116	0.63	0.4332	ANTIGEN
15	TFLLKYNENG	274	0.67	0.426	ANTIGEN
25	IFGTTLDSKT	105	0.57	0.4027	ANTIGEN
21	LFRKSNLKPF	455	0.61	0.379	NON-ANTIGEN
7	WMESEFRVYS	152	0.75	0.3518	NON-ANTIGEN
10	QLPPAYTNSF	23	0.72	0.3474	NON-ANTIGEN
13	RFQTLLALHR	237	0.69	0.3353	NON-ANTIGEN
13	PVLPFNDGVY	82	0.69	0.3324	NON-ANTIGEN
8	VGGNYNYLYR	445	0.74	0.3204	NON-ANTIGEN
19	VASQSIIAYT	687	0.63	0.3132	NON-ANTIGEN
28	LVRDLPQGFS	212	0.53	0.29	NON-ANTIGEN
18	VEGFNCYFPL	483	0.64	0.283	NON-ANTIGEN
14	SIVRFPNITN	325	0.68	0.2809	NON-ANTIGEN
14	IHADQLTPTW	624	0.68	0.2628	NON-ANTIGEN
2	GVSVITPGTN	594	0.8	0.2538	NON-ANTIGEN
18	TLKSFTVEKG	302	0.64	0.2495	NON-ANTIGEN
17	SSGWTAGAAA	255	0.65	0.2219	NON-ANTIGEN
12	TNSPRRARSV	678	0.7	0.221	NON-ANTIGEN
14	PGDSSSGWTA	251	0.68	0.221	NON-ANTIGEN
23	TQLNRALTGI	761	0.59	0.2187	NON-ANTIGEN
19	SVLHSTQDLF	46	0.63	0.2151	NON-ANTIGEN
13	CTEVPVAIHA	617	0.69	0.1753	NON-ANTIGEN
24	YHKNNKSWME	145	0.58	0.1657	NON-ANTIGEN
26	VCGPKKSTNL	524	0.56	0.0947	NON-ANTIGEN
11	NATNVVIKVC	122	0.71	0.0919	NON-ANTIGEN
16	DAVRDPQTLE	574	0.66	0.0812	NON-ANTIGEN
13	LYNSASFSTF	368	0.69	0.0707	NON-ANTIGEN
13	TVEKGIYQTS	307	0.69	0.0601	NON-ANTIGEN
8	IYQAGSTPCN	472	0.74	0.0551	NON-ANTIGEN
5	FKNIDGYFKI	194	0.77	0.0261	NON-ANTIGEN
14	YKTPPIKDFG	789	0.68	0.02	NON-ANTIGEN
13	SANNCTFEYV	162	0.69	0.0177	NON-ANTIGEN
16	YSTGSNVFQT	636	0.66	0.0167	NON-ANTIGEN
14	SYQTQTNSPR	673	0.68	-0.0008	NON-ANTIGEN
8	YLQPRTFLLK	269	0.74	-0.0183	NON-ANTIGEN
15	RKRISNCVAD	355	0.67	-0.0428	NON-ANTIGEN
6	VFRSSVLHST	42	0.76	-0.0642	NON-ANTIGEN
5	ICGDSTECSN	742	0.77	-0.0707	NON-ANTIGEN
17	FGEVFNATRF	338	0.65	-0.0941	NON-ANTIGEN
27	GVYYPDKVFR	35	0.54	-0.1378	NON-ANTIGEN
22	APATVCGPKK	520	0.6	-0.1417	NON-ANTIGEN
13	SNCVADYSVL	359	0.69	-0.1444	NON-ANTIGEN
19	NGTKRFDNPV	74	0.63	-0.1686	NON-ANTIGEN
8	DLFLPFFSNV	53	0.74	-0.1949	NON-ANTIGEN
18	SALEPLVDLP	221	0.64	-0.2366	NON-ANTIGEN
10	GNFKNLREFV	184	0.72	-0.2373	NON-ANTIGEN
4	FQQFGRDIAD	562	0.78	-0.2747	NON-ANTIGEN
7	VIRGDEVRQI	401	0.75	-0.3175	NON-ANTIGEN
10	REFVFKNIDG	190	0.72	-0.325	NON-ANTIGEN
21	PFERDISTEI	463	0.61	-0.3446	NON-ANTIGEN
21	TNVYADSFVI	393	0.61	-0.4541	NON-ANTIGEN
13	NYLYRLFRKS	450	0.69	-0.4937	NON-ANTIGEN
9	KLPDDFTGCV	424	0.73	-0.5308	NON-ANTIGEN
26	CEFQFCNDPF	131	0.56	-0.6637	NON-ANTIGEN
21	VIKVCEFQFC	127	0.61	-0.8173	NON-ANTIGEN
13	VDCTMYICGD	736	0.69	-0.8689	NON-ANTIGEN
7	KSNIIRGWIF	97	0.75	-1.2675	NON-ANTIGEN

## Sheet: Tool_DLBEpitope
BCL Epitope as predicted by DLBEpitope	VaxiJenScore	Probable Antigen/ Non- Antigen
KLNDLCFTNVYADSFVIRGDEVRQIAPGQTGKIADYNY	1.0205	ANTIGEN
SVAYSNNSIAIPTNFTISVTTEILPVSMTKTSVDCTMY	1.0082	ANTIGEN
NSVAYSNNSIAIPTNFTISVTTEILPVSMTKTSVDCTM	0.9982	ANTIGEN		BCL epitope used in vaccine construct	VaxiJen score
TLEILDITPCSFGGVSVITPGTNTSNQVAVLYQDVNCT	0.9869	ANTIGEN		DLCFTNVY	1.8569
ENSVAYSNNSIAIPTNFTISVTTEILPVSMTKTSVDCT	0.9843	ANTIGEN
LEILDITPCSFGGVSVITPGTNTSNQVAVLYQDVNCTE	0.9815	ANTIGEN
VAYSNNSIAIPTNFTISVTTEILPVSMTKTSVDCTMYI	0.9725	ANTIGEN
TKLNDLCFTNVYADSFVIRGDEVRQIAPGQTGKIADYN	0.9678	ANTIGEN
TFKCYGVSPTKLNDLCFTNVYADSFVIRGDEVRQIAPG	0.9625	ANTIGEN
VFQTRAGCLIGAEHVNNSYECDIPIGAGICASYQTQTN	0.9477	ANTIGEN
MSLGAENSVAYSNNSIAIPTNFTISVTTEILPVSMTKT	0.9475	ANTIGEN
FQTRAGCLIGAEHVNNSYECDIPIGAGICASYQTQTNS	0.9465	ANTIGEN
LNDLCFTNVYADSFVIRGDEVRQIAPGQTGKIADYNYK	0.946	ANTIGEN
AENSVAYSNNSIAIPTNFTISVTTEILPVSMTKTSVDC	0.9393	ANTIGEN
PKKSTNLVKNKCVNFNFNGLTGTGVLTESNKKFLPFQQ	0.936	ANTIGEN
QTLEILDITPCSFGGVSVITPGTNTSNQVAVLYQDVNC	0.9352	ANTIGEN
EILDITPCSFGGVSVITPGTNTSNQVAVLYQDVNCTEV	0.9338	ANTIGEN
GPKKSTNLVKNKCVNFNFNGLTGTGVLTESNKKFLPFQ	0.9335	ANTIGEN
PTKLNDLCFTNVYADSFVIRGDEVRQIAPGQTGKIADY	0.9218	ANTIGEN
NDLCFTNVYADSFVIRGDEVRQIAPGQTGKIADYNYKL	0.9001	ANTIGEN
QTRAGCLIGAEHVNNSYECDIPIGAGICASYQTQTNSP	0.8958	ANTIGEN
KKSTNLVKNKCVNFNFNGLTGTGVLTESNKKFLPFQQF	0.8913	ANTIGEN
QIAPGQTGKIADYNYKLPDDFTGCVIAWNSNNLDSKVG	0.8849	ANTIGEN
TGSNVFQTRAGCLIGAEHVNNSYECDIPIGAGICASYQ	0.8845	ANTIGEN
LDITPCSFGGVSVITPGTNTSNQVAVLYQDVNCTEVPV	0.8821	ANTIGEN
PQTLEILDITPCSFGGVSVITPGTNTSNQVAVLYQDVN	0.8787	ANTIGEN
YTMSLGAENSVAYSNNSIAIPTNFTISVTTEILPVSMT	0.8734	ANTIGEN
SNVFQTRAGCLIGAEHVNNSYECDIPIGAGICASYQTQ	0.8707	ANTIGEN
RDPQTLEILDITPCSFGGVSVITPGTNTSNQVAVLYQD	0.869	ANTIGEN
DPQTLEILDITPCSFGGVSVITPGTNTSNQVAVLYQDV	0.8686	ANTIGEN
AVRDPQTLEILDITPCSFGGVSVITPGTNTSNQVAVLY	0.8684	ANTIGEN
TMSLGAENSVAYSNNSIAIPTNFTISVTTEILPVSMTK	0.868	ANTIGEN
NVFQTRAGCLIGAEHVNNSYECDIPIGAGICASYQTQT	0.8644	ANTIGEN
VRDPQTLEILDITPCSFGGVSVITPGTNTSNQVAVLYQ	0.8608	ANTIGEN
STFKCYGVSPTKLNDLCFTNVYADSFVIRGDEVRQIAP	0.8599	ANTIGEN
LPFQQFGRDIADTTDAVRDPQTLEILDITPCSFGGVSV	0.8566	ANTIGEN
ILDITPCSFGGVSVITPGTNTSNQVAVLYQDVNCTEVP	0.8558	ANTIGEN
GSNVFQTRAGCLIGAEHVNNSYECDIPIGAGICASYQT	0.8542	ANTIGEN
FLPFQQFGRDIADTTDAVRDPQTLEILDITPCSFGGVS	0.8518	ANTIGEN
STGSNVFQTRAGCLIGAEHVNNSYECDIPIGAGICASY	0.8504	ANTIGEN
VADYSVLYNSASFSTFKCYGVSPTKLNDLCFTNVYADS	0.8498	ANTIGEN
GRDIADTTDAVRDPQTLEILDITPCSFGGVSVITPGTN	0.8478	ANTIGEN
TWRVYSTGSNVFQTRAGCLIGAEHVNNSYECDIPIGAG	0.8456	ANTIGEN
SNCVADYSVLYNSASFSTFKCYGVSPTKLNDLCFTNVY	0.8432	ANTIGEN
QLTPTWRVYSTGSNVFQTRAGCLIGAEHVNNSYECDIP	0.8417	ANTIGEN
DLCFTNVYADSFVIRGDEVRQIAPGQTGKIADYNYKLP	0.839	ANTIGEN
KCVNFNFNGLTGTGVLTESNKKFLPFQQFGRDIADTTD	0.8365	ANTIGEN
CGPKKSTNLVKNKCVNFNFNGLTGTGVLTESNKKFLPF	0.8363	ANTIGEN
DITPCSFGGVSVITPGTNTSNQVAVLYQDVNCTEVPVA	0.8344	ANTIGEN
LTPTWRVYSTGSNVFQTRAGCLIGAEHVNNSYECDIPI	0.8333	ANTIGEN
IAPGQTGKIADYNYKLPDDFTGCVIAWNSNNLDSKVGG	0.8304	ANTIGEN
LCFTNVYADSFVIRGDEVRQIAPGQTGKIADYNYKLPD	0.83	ANTIGEN
ADYSVLYNSASFSTFKCYGVSPTKLNDLCFTNVYADSF	0.8279	ANTIGEN
IAYTMSLGAENSVAYSNNSIAIPTNFTISVTTEILPVS	0.823	ANTIGEN
AYSNNSIAIPTNFTISVTTEILPVSMTKTSVDCTMYIC	0.8217	ANTIGEN
LSFELLHAPATVCGPKKSTNLVKNKCVNFNFNGLTGTG	0.8171	ANTIGEN
ISNCVADYSVLYNSASFSTFKCYGVSPTKLNDLCFTNV	0.8043	ANTIGEN
DQLTPTWRVYSTGSNVFQTRAGCLIGAEHVNNSYECDI	0.7989	ANTIGEN
PTWRVYSTGSNVFQTRAGCLIGAEHVNNSYECDIPIGA	0.7957	ANTIGEN
YSTGSNVFQTRAGCLIGAEHVNNSYECDIPIGAGICAS	0.7956	ANTIGEN
TRAGCLIGAEHVNNSYECDIPIGAGICASYQTQTNSPR	0.7934	ANTIGEN
GYFKIYSKHTPINLVRDLPQGFSALEPLVDLPIGINIT	0.7886	ANTIGEN
TPTWRVYSTGSNVFQTRAGCLIGAEHVNNSYECDIPIG	0.7881	ANTIGEN
AYTMSLGAENSVAYSNNSIAIPTNFTISVTTEILPVSM	0.7863	ANTIGEN
HADQLTPTWRVYSTGSNVFQTRAGCLIGAEHVNNSYEC	0.786	ANTIGEN
CVNFNFNGLTGTGVLTESNKKFLPFQQFGRDIADTTDA	0.7856	ANTIGEN
KFLPFQQFGRDIADTTDAVRDPQTLEILDITPCSFGGV	0.7847	ANTIGEN
VRQIAPGQTGKIADYNYKLPDDFTGCVIAWNSNNLDSK	0.781	ANTIGEN
RVYSTGSNVFQTRAGCLIGAEHVNNSYECDIPIGAGIC	0.78	ANTIGEN
GFNCYFPLQSYGFQPTNGVGYQPYRVVVLSFELLHAPA	0.7783	ANTIGEN
NKKFLPFQQFGRDIADTTDAVRDPQTLEILDITPCSFG	0.7775	ANTIGEN
CYFPLQSYGFQPTNGVGYQPYRVVVLSFELLHAPATVC	0.7735	ANTIGEN
RQIAPGQTGKIADYNYKLPDDFTGCVIAWNSNNLDSKV	0.7687	ANTIGEN
ADQLTPTWRVYSTGSNVFQTRAGCLIGAEHVNNSYECD	0.7682	ANTIGEN
FGRDIADTTDAVRDPQTLEILDITPCSFGGVSVITPGT	0.7675	ANTIGEN
VYSTGSNVFQTRAGCLIGAEHVNNSYECDIPIGAGICA	0.767	ANTIGEN
ITPCSFGGVSVITPGTNTSNQVAVLYQDVNCTEVPVAI	0.7636	ANTIGEN
QFGRDIADTTDAVRDPQTLEILDITPCSFGGVSVITPG	0.7624	ANTIGEN
SFELLHAPATVCGPKKSTNLVKNKCVNFNFNGLTGTGV	0.7609	ANTIGEN
TPCSFGGVSVITPGTNTSNQVAVLYQDVNCTEVPVAIH	0.7571	ANTIGEN
PATVCGPKKSTNLVKNKCVNFNFNGLTGTGVLTESNKK	0.7569	ANTIGEN
FQQFGRDIADTTDAVRDPQTLEILDITPCSFGGVSVIT	0.7553	ANTIGEN
YFKIYSKHTPINLVRDLPQGFSALEPLVDLPIGINITR	0.7544	ANTIGEN
LTESNKKFLPFQQFGRDIADTTDAVRDPQTLEILDITP	0.7493	ANTIGEN
PTNFTISVTTEILPVSMTKTSVDCTMYICGDSTECSNL	0.7473	ANTIGEN
GWTFGAGAALQIPFAMQMAYRFNGIGVTQNVLYENQKL	0.7459	ANTIGEN
PFQQFGRDIADTTDAVRDPQTLEILDITPCSFGGVSVI	0.7419	ANTIGEN
VNFNFNGLTGTGVLTESNKKFLPFQQFGRDIADTTDAV	0.7417	ANTIGEN
QQFGRDIADTTDAVRDPQTLEILDITPCSFGGVSVITP	0.7391	ANTIGEN
IIAYTMSLGAENSVAYSNNSIAIPTNFTISVTTEILPV	0.7371	ANTIGEN
FVFLVLLPLVSSQCVNLTTRTQLPPAYTNSFTRGVYYP	0.7369	ANTIGEN
CNGVEGFNCYFPLQSYGFQPTNGVGYQPYRVVVLSFEL	0.7326	ANTIGEN
AIHADQLTPTWRVYSTGSNVFQTRAGCLIGAEHVNNSY	0.7275	ANTIGEN
LVLLPLVSSQCVNLTTRTQLPPAYTNSFTRGVYYPDKV	0.7241	ANTIGEN
VPVAIHADQLTPTWRVYSTGSNVFQTRAGCLIGAEHVN	0.7235	ANTIGEN
IHADQLTPTWRVYSTGSNVFQTRAGCLIGAEHVNNSYE	0.7137	ANTIGEN
VAIHADQLTPTWRVYSTGSNVFQTRAGCLIGAEHVNNS	0.7115	ANTIGEN
YQDVNCTEVPVAIHADQLTPTWRVYSTGSNVFQTRAGC	0.7113	ANTIGEN
YSNNSIAIPTNFTISVTTEILPVSMTKTSVDCTMYICG	0.7093	ANTIGEN
ATVCGPKKSTNLVKNKCVNFNFNGLTGTGVLTESNKKF	0.709	ANTIGEN
PVAIHADQLTPTWRVYSTGSNVFQTRAGCLIGAEHVNN	0.7088	ANTIGEN
SGWTFGAGAALQIPFAMQMAYRFNGIGVTQNVLYENQK	0.7076	ANTIGEN
QTGKIADYNYKLPDDFTGCVIAWNSNNLDSKVGGNYNY	0.706	ANTIGEN
FKIYSKHTPINLVRDLPQGFSALEPLVDLPIGINITRF	0.7039	ANTIGEN
SIIAYTMSLGAENSVAYSNNSIAIPTNFTISVTTEILP	0.703	ANTIGEN
APATVCGPKKSTNLVKNKCVNFNFNGLTGTGVLTESNK	0.7025	ANTIGEN
PCNGVEGFNCYFPLQSYGFQPTNGVGYQPYRVVVLSFE	0.7023	ANTIGEN
SVASQSIIAYTMSLGAENSVAYSNNSIAIPTNFTISVT	0.6963	ANTIGEN
PGQTGKIADYNYKLPDDFTGCVIAWNSNNLDSKVGGNY	0.6951	ANTIGEN
GQTGKIADYNYKLPDDFTGCVIAWNSNNLDSKVGGNYN	0.6894	ANTIGEN
FELLHAPATVCGPKKSTNLVKNKCVNFNFNGLTGTGVL	0.6879	ANTIGEN
VCGPKKSTNLVKNKCVNFNFNGLTGTGVLTESNKKFLP	0.6878	ANTIGEN
MFVFLVLLPLVSSQCVNLTTRTQLPPAYTNSFTRGVYY	0.6846	ANTIGEN
FLVLLPLVSSQCVNLTTRTQLPPAYTNSFTRGVYYPDK	0.6827	ANTIGEN
GTITSGWTFGAGAALQIPFAMQMAYRFNGIGVTQNVLY	0.6825	ANTIGEN
KKFLPFQQFGRDIADTTDAVRDPQTLEILDITPCSFGG	0.6807	ANTIGEN
KIYSKHTPINLVRDLPQGFSALEPLVDLPIGINITRFQ	0.6804	ANTIGEN
APGQTGKIADYNYKLPDDFTGCVIAWNSNNLDSKVGGN	0.677	ANTIGEN
SNKKFLPFQQFGRDIADTTDAVRDPQTLEILDITPCSF	0.6719	ANTIGEN
TTEILPVSMTKTSVDCTMYICGDSTECSNLLLQYGSFC	0.671	ANTIGEN
VNCTEVPVAIHADQLTPTWRVYSTGSNVFQTRAGCLIG	0.6671	ANTIGEN
HAPATVCGPKKSTNLVKNKCVNFNFNGLTGTGVLTESN	0.6665	ANTIGEN
SIAIPTNFTISVTTEILPVSMTKTSVDCTMYICGDSTE	0.6621	ANTIGEN
GCLIGAEHVNNSYECDIPIGAGICASYQTQTNSPRRAR	0.6575	ANTIGEN
AIPTNFTISVTTEILPVSMTKTSVDCTMYICGDSTECS	0.6569	ANTIGEN
QIPFAMQMAYRFNGIGVTQNVLYENQKLIANQFNSAIG	0.6546	ANTIGEN
EILPVSMTKTSVDCTMYICGDSTECSNLLLQYGSFCTQ	0.6535	ANTIGEN
TSGWTFGAGAALQIPFAMQMAYRFNGIGVTQNVLYENQ	0.6487	ANTIGEN
IAIPTNFTISVTTEILPVSMTKTSVDCTMYICGDSTEC	0.6477	ANTIGEN
IYSKHTPINLVRDLPQGFSALEPLVDLPIGINITRFQT	0.6476	ANTIGEN
ITPGTNTSNQVAVLYQDVNCTEVPVAIHADQLTPTWRV	0.6471	ANTIGEN
TVCGPKKSTNLVKNKCVNFNFNGLTGTGVLTESNKKFL	0.6464	ANTIGEN
TGKIADYNYKLPDDFTGCVIAWNSNNLDSKVGGNYNYL	0.646	ANTIGEN
VASQSIIAYTMSLGAENSVAYSNNSIAIPTNFTISVTT	0.646	ANTIGEN
SQSIIAYTMSLGAENSVAYSNNSIAIPTNFTISVTTEI	0.6449	ANTIGEN
VLTESNKKFLPFQQFGRDIADTTDAVRDPQTLEILDIT	0.6428	ANTIGEN
NFNFNGLTGTGVLTESNKKFLPFQQFGRDIADTTDAVR	0.6424	ANTIGEN
IPTNFTISVTTEILPVSMTKTSVDCTMYICGDSTECSN	0.6423	ANTIGEN
YSKHTPINLVRDLPQGFSALEPLVDLPIGINITRFQTL	0.6385	ANTIGEN
DGYFKIYSKHTPINLVRDLPQGFSALEPLVDLPIGINI	0.6373	ANTIGEN
TESNKKFLPFQQFGRDIADTTDAVRDPQTLEILDITPC	0.6318	ANTIGEN
YTSALLAGTITSGWTFGAGAALQIPFAMQMAYRFNGIG	0.6314	ANTIGEN
ISVTTEILPVSMTKTSVDCTMYICGDSTECSNLLLQYG	0.6298	ANTIGEN
TEVPVAIHADQLTPTWRVYSTGSNVFQTRAGCLIGAEH	0.6248	ANTIGEN
NSIAIPTNFTISVTTEILPVSMTKTSVDCTMYICGDST	0.6234	ANTIGEN
GKIADYNYKLPDDFTGCVIAWNSNNLDSKVGGNYNYLY	0.6214	ANTIGEN
EVPVAIHADQLTPTWRVYSTGSNVFQTRAGCLIGAEHV	0.6176	ANTIGEN
SNNSIAIPTNFTISVTTEILPVSMTKTSVDCTMYICGD	0.6163	ANTIGEN
TPCNGVEGFNCYFPLQSYGFQPTNGVGYQPYRVVVLSF	0.6162	ANTIGEN
ELLHAPATVCGPKKSTNLVKNKCVNFNFNGLTGTGVLT	0.6158	ANTIGEN
RARSVASQSIIAYTMSLGAENSVAYSNNSIAIPTNFTI	0.6111	ANTIGEN
GTNTSNQVAVLYQDVNCTEVPVAIHADQLTPTWRVYST	0.6088	ANTIGEN
LMDLEGKQGNFKNLREFVFKNIDGYFKIYSKHTPINLV	0.6073	ANTIGEN
GAALQIPFAMQMAYRFNGIGVTQNVLYENQKLIANQFN	0.6065	ANTIGEN
VLLPLVSSQCVNLTTRTQLPPAYTNSFTRGVYYPDKVF	0.6043	ANTIGEN
GVLTESNKKFLPFQQFGRDIADTTDAVRDPQTLEILDI	0.6022	ANTIGEN
TNTSNQVAVLYQDVNCTEVPVAIHADQLTPTWRVYSTG	0.6016	ANTIGEN
LQYGSFCTQLNRALTGIAVEQDKNTQEVFAQVKQIYKT	0.601	ANTIGEN
ALQIPFAMQMAYRFNGIGVTQNVLYENQKLIANQFNSA	0.5999	ANTIGEN
ILPVSMTKTSVDCTMYICGDSTECSNLLLQYGSFCTQL	0.5998	ANTIGEN
CFTNVYADSFVIRGDEVRQIAPGQTGKIADYNYKLPDD	0.5993	ANTIGEN
IDGYFKIYSKHTPINLVRDLPQGFSALEPLVDLPIGIN	0.5977	ANTIGEN
AALQIPFAMQMAYRFNGIGVTQNVLYENQKLIANQFNS	0.5957	ANTIGEN
FTISVTTEILPVSMTKTSVDCTMYICGDSTECSNLLLQ	0.5952	ANTIGEN
IPFAMQMAYRFNGIGVTQNVLYENQKLIANQFNSAIGK	0.5944	ANTIGEN
QSIIAYTMSLGAENSVAYSNNSIAIPTNFTISVTTEIL	0.5926	ANTIGEN
STECSNLLLQYGSFCTQLNRALTGIAVEQDKNTQEVFA	0.5916	ANTIGEN
LLPLVSSQCVNLTTRTQLPPAYTNSFTRGVYYPDKVFR	0.5895	ANTIGEN
TEILPVSMTKTSVDCTMYICGDSTECSNLLLQYGSFCT	0.5895	ANTIGEN
NTSNQVAVLYQDVNCTEVPVAIHADQLTPTWRVYSTGS	0.5891	ANTIGEN
CTEVPVAIHADQLTPTWRVYSTGSNVFQTRAGCLIGAE	0.5885	ANTIGEN
LHAPATVCGPKKSTNLVKNKCVNFNFNGLTGTGVLTES	0.5882	ANTIGEN
GDSTECSNLLLQYGSFCTQLNRALTGIAVEQDKNTQEV	0.5881	ANTIGEN
LPVSMTKTSVDCTMYICGDSTECSNLLLQYGSFCTQLN	0.5865	ANTIGEN
LLHAPATVCGPKKSTNLVKNKCVNFNFNGLTGTGVLTE	0.5849	ANTIGEN
VTTEILPVSMTKTSVDCTMYICGDSTECSNLLLQYGSF	0.5842	ANTIGEN
AGAALQIPFAMQMAYRFNGIGVTQNVLYENQKLIANQF	0.5841	ANTIGEN
TISVTTEILPVSMTKTSVDCTMYICGDSTECSNLLLQY	0.5834	ANTIGEN
PVSMTKTSVDCTMYICGDSTECSNLLLQYGSFCTQLNR	0.5818	ANTIGEN
SNLLLQYGSFCTQLNRALTGIAVEQDKNTQEVFAQVKQ	0.5802	ANTIGEN
ESNKKFLPFQQFGRDIADTTDAVRDPQTLEILDITPCS	0.5797	ANTIGEN
SKHTPINLVRDLPQGFSALEPLVDLPIGINITRFQTLL	0.5795	ANTIGEN
NLLLQYGSFCTQLNRALTGIAVEQDKNTQEVFAQVKQI	0.5758	ANTIGEN
NIDGYFKIYSKHTPINLVRDLPQGFSALEPLVDLPIGI	0.574	ANTIGEN
LPLVSSQCVNLTTRTQLPPAYTNSFTRGVYYPDKVFRS	0.5729	ANTIGEN
LQIPFAMQMAYRFNGIGVTQNVLYENQKLIANQFNSAI	0.5719	ANTIGEN
NNSIAIPTNFTISVTTEILPVSMTKTSVDCTMYICGDS	0.5717	ANTIGEN
FNFNGLTGTGVLTESNKKFLPFQQFGRDIADTTDAVRD	0.5716	ANTIGEN
RRARSVASQSIIAYTMSLGAENSVAYSNNSIAIPTNFT	0.5711	ANTIGEN
STPCNGVEGFNCYFPLQSYGFQPTNGVGYQPYRVVVLS	0.5708	ANTIGEN
DSTECSNLLLQYGSFCTQLNRALTGIAVEQDKNTQEVF	0.5703	ANTIGEN
HTPINLVRDLPQGFSALEPLVDLPIGINITRFQTLLAL	0.5698	ANTIGEN
MDLEGKQGNFKNLREFVFKNIDGYFKIYSKHTPINLVR	0.5696	ANTIGEN
LLLQYGSFCTQLNRALTGIAVEQDKNTQEVFAQVKQIY	0.5661	ANTIGEN
VITPGTNTSNQVAVLYQDVNCTEVPVAIHADQLTPTWR	0.5656	ANTIGEN
ARSVASQSIIAYTMSLGAENSVAYSNNSIAIPTNFTIS	0.5605	ANTIGEN
SNQVAVLYQDVNCTEVPVAIHADQLTPTWRVYSTGSNV	0.5603	ANTIGEN
INLVRDLPQGFSALEPLVDLPIGINITRFQTLLALHRS	0.5597	ANTIGEN
YADSFVIRGDEVRQIAPGQTGKIADYNYKLPDDFTGCV	0.5581	ANTIGEN
TLKSFTVEKGIYQTSNFRVQPTESIVRFPNITNLCPFG	0.5547	ANTIGEN
PLVSSQCVNLTTRTQLPPAYTNSFTRGVYYPDKVFRSS	0.5536	ANTIGEN
RSVASQSIIAYTMSLGAENSVAYSNNSIAIPTNFTISV	0.553	ANTIGEN
WNRKRISNCVADYSVLYNSASFSTFKCYGVSPTKLNDL	0.5519	ANTIGEN
VSMTKTSVDCTMYICGDSTECSNLLLQYGSFCTQLNRA	0.5515	ANTIGEN
LYQDVNCTEVPVAIHADQLTPTWRVYSTGSNVFQTRAG	0.5514	ANTIGEN
DFGGFNFSQILPDPSKPSKRSFIEDLLFNKVTLADAGF	0.551	ANTIGEN
PGTNTSNQVAVLYQDVNCTEVPVAIHADQLTPTWRVYS	0.5432	ANTIGEN
VIRGDEVRQIAPGQTGKIADYNYKLPDDFTGCVIAWNS	0.5415	ANTIGEN
AVLYQDVNCTEVPVAIHADQLTPTWRVYSTGSNVFQTR	0.5415	ANTIGEN
SVTTEILPVSMTKTSVDCTMYICGDSTECSNLLLQYGS	0.5407	ANTIGEN
QAGSTPCNGVEGFNCYFPLQSYGFQPTNGVGYQPYRVV	0.5388	ANTIGEN
IRGDEVRQIAPGQTGKIADYNYKLPDDFTGCVIAWNSN	0.5387	ANTIGEN
VSVITPGTNTSNQVAVLYQDVNCTEVPVAIHADQLTPT	0.5357	ANTIGEN
GVSVITPGTNTSNQVAVLYQDVNCTEVPVAIHADQLTP	0.535	ANTIGEN
FAMQMAYRFNGIGVTQNVLYENQKLIANQFNSAIGKIQ	0.5331	ANTIGEN
YQAGSTPCNGVEGFNCYFPLQSYGFQPTNGVGYQPYRV	0.531	ANTIGEN
AWNRKRISNCVADYSVLYNSASFSTFKCYGVSPTKLND	0.5301	ANTIGEN
NKSWMESEFRVYSSANNCTFEYVSQPFLMDLEGKQGNF	0.53	ANTIGEN
CGDSTECSNLLLQYGSFCTQLNRALTGIAVEQDKNTQE	0.5288	ANTIGEN
TPGTNTSNQVAVLYQDVNCTEVPVAIHADQLTPTWRVY	0.5255	ANTIGEN
TECSNLLLQYGSFCTQLNRALTGIAVEQDKNTQEVFAQ	0.5247	ANTIGEN
GSTPCNGVEGFNCYFPLQSYGFQPTNGVGYQPYRVVVL	0.5246	ANTIGEN
FLMDLEGKQGNFKNLREFVFKNIDGYFKIYSKHTPINL	0.5235	ANTIGEN
TGTGVLTESNKKFLPFQQFGRDIADTTDAVRDPQTLEI	0.5235	ANTIGEN
ECSNLLLQYGSFCTQLNRALTGIAVEQDKNTQEVFAQV	0.5228	ANTIGEN
SWMESEFRVYSSANNCTFEYVSQPFLMDLEGKQGNFKN	0.5204	ANTIGEN
KIADYNYKLPDDFTGCVIAWNSNNLDSKVGGNYNYLYR	0.5198	ANTIGEN
AMQMAYRFNGIGVTQNVLYENQKLIANQFNSAIGKIQD	0.5187	ANTIGEN
PFAMQMAYRFNGIGVTQNVLYENQKLIANQFNSAIGKI	0.5158	ANTIGEN
QYGSFCTQLNRALTGIAVEQDKNTQEVFAQVKQIYKTP	0.5156	ANTIGEN
SVITPGTNTSNQVAVLYQDVNCTEVPVAIHADQLTPTW	0.5151	ANTIGEN
TGVLTESNKKFLPFQQFGRDIADTTDAVRDPQTLEILD	0.5102	ANTIGEN
PFLMDLEGKQGNFKNLREFVFKNIDGYFKIYSKHTPIN	0.5066	ANTIGEN
VYADSFVIRGDEVRQIAPGQTGKIADYNYKLPDDFTGC	0.5056	ANTIGEN
GLTGTGVLTESNKKFLPFQQFGRDIADTTDAVRDPQTL	0.505	ANTIGEN
SLSSTASALGKLQDVVNQNAQALNTLVKQLSSNFGAIS	0.4995	ANTIGEN
WMESEFRVYSSANNCTFEYVSQPFLMDLEGKQGNFKNL	0.4987	ANTIGEN
KNIDGYFKIYSKHTPINLVRDLPQGFSALEPLVDLPIG	0.4971	ANTIGEN
FVFKNIDGYFKIYSKHTPINLVRDLPQGFSALEPLVDL	0.4969	ANTIGEN
ICGDSTECSNLLLQYGSFCTQLNRALTGIAVEQDKNTQ	0.4963	ANTIGEN
EDLLFNKVTLADAGFIKQYGDCLGDIAARDLICAQKFN	0.4961	ANTIGEN
NNKSWMESEFRVYSSANNCTFEYVSQPFLMDLEGKQGN	0.4953	ANTIGEN
VAVLYQDVNCTEVPVAIHADQLTPTWRVYSTGSNVFQT	0.4918	ANTIGEN
EFVFKNIDGYFKIYSKHTPINLVRDLPQGFSALEPLVD	0.4883	ANTIGEN
LTGTGVLTESNKKFLPFQQFGRDIADTTDAVRDPQTLE	0.4878	ANTIGEN
DLEGKQGNFKNLREFVFKNIDGYFKIYSKHTPINLVRD	0.4865	ANTIGEN
MQMAYRFNGIGVTQNVLYENQKLIANQFNSAIGKIQDS	0.4858	ANTIGEN
VTLADAGFIKQYGDCLGDIAARDLICAQKFNGLTVLPP	0.4839	ANTIGEN
KVTLADAGFIKQYGDCLGDIAARDLICAQKFNGLTVLP	0.4819	ANTIGEN
STQDLFLPFFSNVTWFHAIHVSGTNGTKRFDNPVLPFN	0.4809	ANTIGEN
QPFLMDLEGKQGNFKNLREFVFKNIDGYFKIYSKHTPI	0.4777	ANTIGEN
QVAVLYQDVNCTEVPVAIHADQLTPTWRVYSTGSNVFQ	0.4728	ANTIGEN
PRRARSVASQSIIAYTMSLGAENSVAYSNNSIAIPTNF	0.468	ANTIGEN
LLQYGSFCTQLNRALTGIAVEQDKNTQEVFAQVKQIYK	0.4637	ANTIGEN
YICGDSTECSNLLLQYGSFCTQLNRALTGIAVEQDKNT	0.4608	ANTIGEN
IADYNYKLPDDFTGCVIAWNSNNLDSKVGGNYNYLYRL	0.4588	ANTIGEN
GTGVLTESNKKFLPFQQFGRDIADTTDAVRDPQTLEIL	0.4568	ANTIGEN
NLREFVFKNIDGYFKIYSKHTPINLVRDLPQGFSALEP	0.4507	ANTIGEN
LEGKQGNFKNLREFVFKNIDGYFKIYSKHTPINLVRDL	0.4497	ANTIGEN
IANQFNSAIGKIQDSLSSTASALGKLQDVVNQNAQALN	0.4475	ANTIGEN
MYICGDSTECSNLLLQYGSFCTQLNRALTGIAVEQDKN	0.4466	ANTIGEN
QTNSPRRARSVASQSIIAYTMSLGAENSVAYSNNSIAI	0.4463	ANTIGEN
KSWMESEFRVYSSANNCTFEYVSQPFLMDLEGKQGNFK	0.4452	ANTIGEN
TQDLFLPFFSNVTWFHAIHVSGTNGTKRFDNPVLPFND	0.4409	ANTIGEN
NFNGLTGTGVLTESNKKFLPFQQFGRDIADTTDAVRDP	0.4408	ANTIGEN
SPRRARSVASQSIIAYTMSLGAENSVAYSNNSIAIPTN	0.4405	ANTIGEN
NKVTLADAGFIKQYGDCLGDIAARDLICAQKFNGLTVL	0.44	ANTIGEN
IEDLLFNKVTLADAGFIKQYGDCLGDIAARDLICAQKF	0.4381	ANTIGEN
LTDEMIAQYTSALLAGTITSGWTFGAGAALQIPFAMQM	0.4372	ANTIGEN
FNKVTLADAGFIKQYGDCLGDIAARDLICAQKFNGLTV	0.4369	ANTIGEN
FNGLTGTGVLTESNKKFLPFQQFGRDIADTTDAVRDPQ	0.4362	ANTIGEN
FIEDLLFNKVTLADAGFIKQYGDCLGDIAARDLICAQK	0.4357	ANTIGEN
GDIAARDLICAQKFNGLTVLPPLLTDEMIAQYTSALLA	0.4342	ANTIGEN
GFNFSQILPDPSKPSKRSFIEDLLFNKVTLADAGFIKQ	0.4292	ANTIGEN
LSSTASALGKLQDVVNQNAQALNTLVKQLSSNFGAISS	0.4288	ANTIGEN
TLADAGFIKQYGDCLGDIAARDLICAQKFNGLTVLPPL	0.4268	ANTIGEN
IYQAGSTPCNGVEGFNCYFPLQSYGFQPTNGVGYQPYR	0.4221	ANTIGEN
GGFNFSQILPDPSKPSKRSFIEDLLFNKVTLADAGFIK	0.4215	ANTIGEN
MTKTSVDCTMYICGDSTECSNLLLQYGSFCTQLNRALT	0.4178	ANTIGEN
FCTQLNRALTGIAVEQDKNTQEVFAQVKQIYKTPPIKD	0.4175	ANTIGEN
YRFNGIGVTQNVLYENQKLIANQFNSAIGKIQDSLSST	0.4163	ANTIGEN
ADAGFIKQYGDCLGDIAARDLICAQKFNGLTVLPPLLT	0.4156	ANTIGEN
SMTKTSVDCTMYICGDSTECSNLLLQYGSFCTQLNRAL	0.4149	ANTIGEN
TNSPRRARSVASQSIIAYTMSLGAENSVAYSNNSIAIP	0.4147	ANTIGEN
IGVTQNVLYENQKLIANQFNSAIGKIQDSLSSTASALG	0.4145	ANTIGEN
EIYQAGSTPCNGVEGFNCYFPLQSYGFQPTNGVGYQPY	0.4136	ANTIGEN
LLFNKVTLADAGFIKQYGDCLGDIAARDLICAQKFNGL	0.411	ANTIGEN
QMAYRFNGIGVTQNVLYENQKLIANQFNSAIGKIQDSL	0.41	ANTIGEN
SSTASALGKLQDVVNQNAQALNTLVKQLSSNFGAISSV	0.4061	ANTIGEN
FKNIDGYFKIYSKHTPINLVRDLPQGFSALEPLVDLPI	0.406	ANTIGEN
NGLTGTGVLTESNKKFLPFQQFGRDIADTTDAVRDPQT	0.4059	ANTIGEN
REFVFKNIDGYFKIYSKHTPINLVRDLPQGFSALEPLV	0.4051	ANTIGEN
SVDCTMYICGDSTECSNLLLQYGSFCTQLNRALTGIAV	0.4042	ANTIGEN
KTSVDCTMYICGDSTECSNLLLQYGSFCTQLNRALTGI	0.4038	ANTIGEN
SFCTQLNRALTGIAVEQDKNTQEVFAQVKQIYKTPPIK	0.4008	ANTIGEN
LADAGFIKQYGDCLGDIAARDLICAQKFNGLTVLPPLL	0.4008	ANTIGEN
DLLFNKVTLADAGFIKQYGDCLGDIAARDLICAQKFNG	0.4005	ANTIGEN
VDCTMYICGDSTECSNLLLQYGSFCTQLNRALTGIAVE	0.4001	ANTIGEN
ASYQTQTNSPRRARSVASQSIIAYTMSLGAENSVAYSN	0.3997	NON-ANTIGEN
TQTNSPRRARSVASQSIIAYTMSLGAENSVAYSNNSIA	0.3996	NON-ANTIGEN
MAYRFNGIGVTQNVLYENQKLIANQFNSAIGKIQDSLS	0.3989	NON-ANTIGEN
NCTFEYVSQPFLMDLEGKQGNFKNLREFVFKNIDGYFK	0.3978	NON-ANTIGEN
TKTSVDCTMYICGDSTECSNLLLQYGSFCTQLNRALTG	0.3977	NON-ANTIGEN
STEIYQAGSTPCNGVEGFNCYFPLQSYGFQPTNGVGYQ	0.3953	NON-ANTIGEN
YSSANNCTFEYVSQPFLMDLEGKQGNFKNLREFVFKNI	0.395	NON-ANTIGEN
NFKNLREFVFKNIDGYFKIYSKHTPINLVRDLPQGFSA	0.3934	NON-ANTIGEN
DCLGDIAARDLICAQKFNGLTVLPPLLTDEMIAQYTSA	0.3914	NON-ANTIGEN
CASYQTQTNSPRRARSVASQSIIAYTMSLGAENSVAYS	0.3907	NON-ANTIGEN
ANQFNSAIGKIQDSLSSTASALGKLQDVVNQNAQALNT	0.3893	NON-ANTIGEN
SYQTQTNSPRRARSVASQSIIAYTMSLGAENSVAYSNN	0.3889	NON-ANTIGEN
CTQLNRALTGIAVEQDKNTQEVFAQVKQIYKTPPIKDF	0.3886	NON-ANTIGEN
RFNGIGVTQNVLYENQKLIANQFNSAIGKIQDSLSSTA	0.3875	NON-ANTIGEN
TEIYQAGSTPCNGVEGFNCYFPLQSYGFQPTNGVGYQP	0.3874	NON-ANTIGEN
LIANQFNSAIGKIQDSLSSTASALGKLQDVVNQNAQAL	0.3873	NON-ANTIGEN
LPPLLTDEMIAQYTSALLAGTITSGWTFGAGAALQIPF	0.386	NON-ANTIGEN
EGKQGNFKNLREFVFKNIDGYFKIYSKHTPINLVRDLP	0.3845	NON-ANTIGEN
TSVDCTMYICGDSTECSNLLLQYGSFCTQLNRALTGIA	0.3841	NON-ANTIGEN
FNFSQILPDPSKPSKRSFIEDLLFNKVTLADAGFIKQY	0.3836	NON-ANTIGEN
HKNNKSWMESEFRVYSSANNCTFEYVSQPFLMDLEGKQ	0.383	NON-ANTIGEN
NQFNSAIGKIQDSLSSTASALGKLQDVVNQNAQALNTL	0.3825	NON-ANTIGEN
DFTGCVIAWNSNNLDSKVGGNYNYLYRLFRKSNLKPFE	0.3818	NON-ANTIGEN
TMYICGDSTECSNLLLQYGSFCTQLNRALTGIAVEQDK	0.3813	NON-ANTIGEN
GLTVLPPLLTDEMIAQYTSALLAGTITSGWTFGAGAAL	0.3809	NON-ANTIGEN
QFNSAIGKIQDSLSSTASALGKLQDVVNQNAQALNTLV	0.3791	NON-ANTIGEN
KNLREFVFKNIDGYFKIYSKHTPINLVRDLPQGFSALE	0.3779	NON-ANTIGEN
AIGKIQDSLSSTASALGKLQDVVNQNAQALNTLVKQLS	0.3775	NON-ANTIGEN
NDPFLGVYYHKNNKSWMESEFRVYSSANNCTFEYVSQP	0.3771	NON-ANTIGEN
DISTEIYQAGSTPCNGVEGFNCYFPLQSYGFQPTNGVG	0.3763	NON-ANTIGEN
DSLSSTASALGKLQDVVNQNAQALNTLVKQLSSNFGAI	0.3753	NON-ANTIGEN
DPFLGVYYHKNNKSWMESEFRVYSSANNCTFEYVSQPF	0.375	NON-ANTIGEN
DAGFIKQYGDCLGDIAARDLICAQKFNGLTVLPPLLTD	0.3739	NON-ANTIGEN
LREFVFKNIDGYFKIYSKHTPINLVRDLPQGFSALEPL	0.3707	NON-ANTIGEN
RDISTEIYQAGSTPCNGVEGFNCYFPLQSYGFQPTNGV	0.3688	NON-ANTIGEN
NSAIGKIQDSLSSTASALGKLQDVVNQNAQALNTLVKQ	0.3687	NON-ANTIGEN
ARDLICAQKFNGLTVLPPLLTDEMIAQYTSALLAGTIT	0.366	NON-ANTIGEN
NVLYENQKLIANQFNSAIGKIQDSLSSTASALGKLQDV	0.3655	NON-ANTIGEN
YHKNNKSWMESEFRVYSSANNCTFEYVSQPFLMDLEGK	0.3651	NON-ANTIGEN
KQGNFKNLREFVFKNIDGYFKIYSKHTPINLVRDLPQG	0.3633	NON-ANTIGEN
PDDFTGCVIAWNSNNLDSKVGGNYNYLYRLFRKSNLKP	0.3628	NON-ANTIGEN
TASALGKLQDVVNQNAQALNTLVKQLSSNFGAISSVLN	0.3628	NON-ANTIGEN
LFNKVTLADAGFIKQYGDCLGDIAARDLICAQKFNGLT	0.3611	NON-ANTIGEN
ISTEIYQAGSTPCNGVEGFNCYFPLQSYGFQPTNGVGY	0.3607	NON-ANTIGEN
QYGDCLGDIAARDLICAQKFNGLTVLPPLLTDEMIAQY	0.3584	NON-ANTIGEN
STASALGKLQDVVNQNAQALNTLVKQLSSNFGAISSVL	0.358	NON-ANTIGEN
VYYHKNNKSWMESEFRVYSSANNCTFEYVSQPFLMDLE	0.3579	NON-ANTIGEN
VYSSANNCTFEYVSQPFLMDLEGKQGNFKNLREFVFKN	0.3578	NON-ANTIGEN
ADYNYKLPDDFTGCVIAWNSNNLDSKVGGNYNYLYRLF	0.3552	NON-ANTIGEN
LGVYYHKNNKSWMESEFRVYSSANNCTFEYVSQPFLMD	0.3518	NON-ANTIGEN
NSPRRARSVASQSIIAYTMSLGAENSVAYSNNSIAIPT	0.3502	NON-ANTIGEN
AYRFNGIGVTQNVLYENQKLIANQFNSAIGKIQDSLSS	0.3498	NON-ANTIGEN
NLKPFERDISTEIYQAGSTPCNGVEGFNCYFPLQSYGF	0.3486	NON-ANTIGEN
CNDPFLGVYYHKNNKSWMESEFRVYSSANNCTFEYVSQ	0.3471	NON-ANTIGEN
ERDISTEIYQAGSTPCNGVEGFNCYFPLQSYGFQPTNG	0.3458	NON-ANTIGEN
FNGIGVTQNVLYENQKLIANQFNSAIGKIQDSLSSTAS	0.3422	NON-ANTIGEN
GDCLGDIAARDLICAQKFNGLTVLPPLLTDEMIAQYTS	0.3421	NON-ANTIGEN
FCNDPFLGVYYHKNNKSWMESEFRVYSSANNCTFEYVS	0.3419	NON-ANTIGEN
FRKSNLKPFERDISTEIYQAGSTPCNGVEGFNCYFPLQ	0.3416	NON-ANTIGEN
SAIGKIQDSLSSTASALGKLQDVVNQNAQALNTLVKQL	0.3414	NON-ANTIGEN
VLYENQKLIANQFNSAIGKIQDSLSSTASALGKLQDVV	0.3411	NON-ANTIGEN
GVYYHKNNKSWMESEFRVYSSANNCTFEYVSQPFLMDL	0.3381	NON-ANTIGEN
GNFKNLREFVFKNIDGYFKIYSKHTPINLVRDLPQGFS	0.3366	NON-ANTIGEN
YGDCLGDIAARDLICAQKFNGLTVLPPLLTDEMIAQYT	0.3364	NON-ANTIGEN
PFLGVYYHKNNKSWMESEFRVYSSANNCTFEYVSQPFL	0.3359	NON-ANTIGEN
FNSAIGKIQDSLSSTASALGKLQDVVNQNAQALNTLVK	0.33	NON-ANTIGEN
FLGVYYHKNNKSWMESEFRVYSSANNCTFEYVSQPFLM	0.3295	NON-ANTIGEN
QNVLYENQKLIANQFNSAIGKIQDSLSSTASALGKLQD	0.3295	NON-ANTIGEN
FNGLTVLPPLLTDEMIAQYTSALLAGTITSGWTFGAGA	0.3226	NON-ANTIGEN
KSNLKPFERDISTEIYQAGSTPCNGVEGFNCYFPLQSY	0.3212	NON-ANTIGEN
FKNLREFVFKNIDGYFKIYSKHTPINLVRDLPQGFSAL	0.3208	NON-ANTIGEN
ENQKLIANQFNSAIGKIQDSLSSTASALGKLQDVVNQN	0.3202	NON-ANTIGEN
TQNVLYENQKLIANQFNSAIGKIQDSLSSTASALGKLQ	0.3189	NON-ANTIGEN
NGIGVTQNVLYENQKLIANQFNSAIGKIQDSLSSTASA	0.3188	NON-ANTIGEN
DCTMYICGDSTECSNLLLQYGSFCTQLNRALTGIAVEQ	0.3167	NON-ANTIGEN
NGLTVLPPLLTDEMIAQYTSALLAGTITSGWTFGAGAA	0.3166	NON-ANTIGEN
KTQSLLIVNNATNVVIKVCEFQFCNDPFLGVYYHKNNK	0.3148	NON-ANTIGEN
QGNFKNLREFVFKNIDGYFKIYSKHTPINLVRDLPQGF	0.3126	NON-ANTIGEN
AGFIKQYGDCLGDIAARDLICAQKFNGLTVLPPLLTDE	0.3101	NON-ANTIGEN
LDSKTQSLLIVNNATNVVIKVCEFQFCNDPFLGVYYHK	0.3096	NON-ANTIGEN
GKQGNFKNLREFVFKNIDGYFKIYSKHTPINLVRDLPQ	0.3096	NON-ANTIGEN
KFNGLTVLPPLLTDEMIAQYTSALLAGTITSGWTFGAG	0.3053	NON-ANTIGEN
SKTQSLLIVNNATNVVIKVCEFQFCNDPFLGVYYHKNN	0.3042	NON-ANTIGEN
RVYSSANNCTFEYVSQPFLMDLEGKQGNFKNLREFVFK	0.304	NON-ANTIGEN
AARDLICAQKFNGLTVLPPLLTDEMIAQYTSALLAGTI	0.3039	NON-ANTIGEN
YENQKLIANQFNSAIGKIQDSLSSTASALGKLQDVVNQ	0.3015	NON-ANTIGEN
QFCNDPFLGVYYHKNNKSWMESEFRVYSSANNCTFEYV	0.3001	NON-ANTIGEN
ASALGKLQDVVNQNAQALNTLVKQLSSNFGAISSVLND	0.2991	NON-ANTIGEN
FTGCVIAWNSNNLDSKVGGNYNYLYRLFRKSNLKPFER	0.2986	NON-ANTIGEN
QKFNGLTVLPPLLTDEMIAQYTSALLAGTITSGWTFGA	0.2985	NON-ANTIGEN
DDFTGCVIAWNSNNLDSKVGGNYNYLYRLFRKSNLKPF	0.2952	NON-ANTIGEN
FERDISTEIYQAGSTPCNGVEGFNCYFPLQSYGFQPTN	0.2941	NON-ANTIGEN
NQKLIANQFNSAIGKIQDSLSSTASALGKLQDVVNQNA	0.2933	NON-ANTIGEN
CTMYICGDSTECSNLLLQYGSFCTQLNRALTGIAVEQD	0.2927	NON-ANTIGEN
FQFCNDPFLGVYYHKNNKSWMESEFRVYSSANNCTFEY	0.291	NON-ANTIGEN
WNSNNLDSKVGGNYNYLYRLFRKSNLKPFERDISTEIY	0.2894	NON-ANTIGEN
LYENQKLIANQFNSAIGKIQDSLSSTASALGKLQDVVN	0.289	NON-ANTIGEN
PFERDISTEIYQAGSTPCNGVEGFNCYFPLQSYGFQPT	0.2868	NON-ANTIGEN
KLIANQFNSAIGKIQDSLSSTASALGKLQDVVNQNAQA	0.2867	NON-ANTIGEN
DSKTQSLLIVNNATNVVIKVCEFQFCNDPFLGVYYHKN	0.286	NON-ANTIGEN
SALGKLQDVVNQNAQALNTLVKQLSSNFGAISSVLNDI	0.2838	NON-ANTIGEN
NATNVVIKVCEFQFCNDPFLGVYYHKNNKSWMESEFRV	0.2787	NON-ANTIGEN
ANNCTFEYVSQPFLMDLEGKQGNFKNLREFVFKNIDGY	0.2782	NON-ANTIGEN
AQKFNGLTVLPPLLTDEMIAQYTSALLAGTITSGWTFG	0.278	NON-ANTIGEN
NFSQILPDPSKPSKRSFIEDLLFNKVTLADAGFIKQYG	0.273	NON-ANTIGEN
QKLIANQFNSAIGKIQDSLSSTASALGKLQDVVNQNAQ	0.2635	NON-ANTIGEN
VLPPLLTDEMIAQYTSALLAGTITSGWTFGAGAALQIP	0.2626	NON-ANTIGEN
DYNYKLPDDFTGCVIAWNSNNLDSKVGGNYNYLYRLFR	0.262	NON-ANTIGEN
GFIKQYGDCLGDIAARDLICAQKFNGLTVLPPLLTDEM	0.2613	NON-ANTIGEN
VFKNIDGYFKIYSKHTPINLVRDLPQGFSALEPLVDLP	0.2598	NON-ANTIGEN
GVTQNVLYENQKLIANQFNSAIGKIQDSLSSTASALGK	0.2595	NON-ANTIGEN
YYHKNNKSWMESEFRVYSSANNCTFEYVSQPFLMDLEG	0.2553	NON-ANTIGEN
ICAQKFNGLTVLPPLLTDEMIAQYTSALLAGTITSGWT	0.2534	NON-ANTIGEN
NNATNVVIKVCEFQFCNDPFLGVYYHKNNKSWMESEFR	0.2529	NON-ANTIGEN
LKPFERDISTEIYQAGSTPCNGVEGFNCYFPLQSYGFQ	0.2415	NON-ANTIGEN
TQSLLIVNNATNVVIKVCEFQFCNDPFLGVYYHKNNKS	0.2412	NON-ANTIGEN
QSLLIVNNATNVVIKVCEFQFCNDPFLGVYYHKNNKSW	0.2392	NON-ANTIGEN
VTQNVLYENQKLIANQFNSAIGKIQDSLSSTASALGKL	0.2383	NON-ANTIGEN
LDSKVGGNYNYLYRLFRKSNLKPFERDISTEIYQAGST	0.234	NON-ANTIGEN
SLLIVNNATNVVIKVCEFQFCNDPFLGVYYHKNNKSWM	0.232	NON-ANTIGEN
LFRKSNLKPFERDISTEIYQAGSTPCNGVEGFNCYFPL	0.2289	NON-ANTIGEN
CAQKFNGLTVLPPLLTDEMIAQYTSALLAGTITSGWTF	0.2287	NON-ANTIGEN
KPFERDISTEIYQAGSTPCNGVEGFNCYFPLQSYGFQP	0.2283	NON-ANTIGEN
SQILPDPSKPSKRSFIEDLLFNKVTLADAGFIKQYGDC	0.2254	NON-ANTIGEN
FIKQYGDCLGDIAARDLICAQKFNGLTVLPPLLTDEMI	0.2239	NON-ANTIGEN
IFGTTLDSKTQSLLIVNNATNVVIKVCEFQFCNDPFLG	0.2201	NON-ANTIGEN
VNNATNVVIKVCEFQFCNDPFLGVYYHKNNKSWMESEF	0.2192	NON-ANTIGEN
ALGKLQDVVNQNAQALNTLVKQLSSNFGAISSVLNDIL	0.2165	NON-ANTIGEN
KLPDDFTGCVIAWNSNNLDSKVGGNYNYLYRLFRKSNL	0.2159	NON-ANTIGEN
LPDDFTGCVIAWNSNNLDSKVGGNYNYLYRLFRKSNLK	0.2063	NON-ANTIGEN
LGKLQDVVNQNAQALNTLVKQLSSNFGAISSVLNDILS	0.2048	NON-ANTIGEN
NYKLPDDFTGCVIAWNSNNLDSKVGGNYNYLYRLFRKS	0.2038	NON-ANTIGEN
TNVVIKVCEFQFCNDPFLGVYYHKNNKSWMESEFRVYS	0.1997	NON-ANTIGEN
LPDPSKPSKRSFIEDLLFNKVTLADAGFIKQYGDCLGD	0.1889	NON-ANTIGEN
YNYKLPDDFTGCVIAWNSNNLDSKVGGNYNYLYRLFRK	0.1872	NON-ANTIGEN
ATNVVIKVCEFQFCNDPFLGVYYHKNNKSWMESEFRVY	0.1844	NON-ANTIGEN
VVIKVCEFQFCNDPFLGVYYHKNNKSWMESEFRVYSSA	0.1843	NON-ANTIGEN
IKVCEFQFCNDPFLGVYYHKNNKSWMESEFRVYSSANN	0.1837	NON-ANTIGEN
YKLPDDFTGCVIAWNSNNLDSKVGGNYNYLYRLFRKSN	0.1817	NON-ANTIGEN
LLIVNNATNVVIKVCEFQFCNDPFLGVYYHKNNKSWME	0.175	NON-ANTIGEN
NVVIKVCEFQFCNDPFLGVYYHKNNKSWMESEFRVYSS	0.1681	NON-ANTIGEN
KVCEFQFCNDPFLGVYYHKNNKSWMESEFRVYSSANNC	0.167	NON-ANTIGEN
GKLQDVVNQNAQALNTLVKQLSSNFGAISSVLNDILSR	0.1651	NON-ANTIGEN
VIKVCEFQFCNDPFLGVYYHKNNKSWMESEFRVYSSAN	0.1637	NON-ANTIGEN
YKTPPIKDFGGFNFSQILPDPSKPSKRSFIEDLLFNKV	0.1621	NON-ANTIGEN
NAQALNTLVKQLSSNFGAISSVLNDILSRLDKVEAEVQ	0.16	NON-ANTIGEN
SKVGGNYNYLYRLFRKSNLKPFERDISTEIYQAGSTPC	0.1508	NON-ANTIGEN
IVNNATNVVIKVCEFQFCNDPFLGVYYHKNNKSWMESE	0.1496	NON-ANTIGEN
KLQDVVNQNAQALNTLVKQLSSNFGAISSVLNDILSRL	0.1438	NON-ANTIGEN
AQALNTLVKQLSSNFGAISSVLNDILSRLDKVEAEVQI	0.1416	NON-ANTIGEN
GWIFGTTLDSKTQSLLIVNNATNVVIKVCEFQFCNDPF	0.1412	NON-ANTIGEN
NQNAQALNTLVKQLSSNFGAISSVLNDILSRLDKVEAE	0.1372	NON-ANTIGEN
KVGGNYNYLYRLFRKSNLKPFERDISTEIYQAGSTPCN	0.1312	NON-ANTIGEN
QALNTLVKQLSSNFGAISSVLNDILSRLDKVEAEVQID	0.1267	NON-ANTIGEN
LQDVVNQNAQALNTLVKQLSSNFGAISSVLNDILSRLD	0.1245	NON-ANTIGEN
VVNQNAQALNTLVKQLSSNFGAISSVLNDILSRLDKVE	0.1197	NON-ANTIGEN
QNAQALNTLVKQLSSNFGAISSVLNDILSRLDKVEAEV	0.1077	NON-ANTIGEN
YRLFRKSNLKPFERDISTEIYQAGSTPCNGVEGFNCYF	0.106	NON-ANTIGEN
IYKTPPIKDFGGFNFSQILPDPSKPSKRSFIEDLLFNK	0.1033	NON-ANTIGEN
LIVNNATNVVIKVCEFQFCNDPFLGVYYHKNNKSWMES	0.1021	NON-ANTIGEN
DVVNQNAQALNTLVKQLSSNFGAISSVLNDILSRLDKV	0.0989	NON-ANTIGEN
VNQNAQALNTLVKQLSSNFGAISSVLNDILSRLDKVEA	0.096	NON-ANTIGEN
NYNYLYRLFRKSNLKPFERDISTEIYQAGSTPCNGVEG	0.0892	NON-ANTIGEN
IIRGWIFGTTLDSKTQSLLIVNNATNVVIKVCEFQFCN	0.0809	NON-ANTIGEN
GNYNYLYRLFRKSNLKPFERDISTEIYQAGSTPCNGVE	0.0784	NON-ANTIGEN
NIIRGWIFGTTLDSKTQSLLIVNNATNVVIKVCEFQFC	0.0649	NON-ANTIGEN
LYRLFRKSNLKPFERDISTEIYQAGSTPCNGVEGFNCY	0.051	NON-ANTIGEN
VGGNYNYLYRLFRKSNLKPFERDISTEIYQAGSTPCNG	0.0473	NON-ANTIGEN
QDVVNQNAQALNTLVKQLSSNFGAISSVLNDILSRLDK	0.0289	NON-ANTIGEN
GGNYNYLYRLFRKSNLKPFERDISTEIYQAGSTPCNGV	0.0279	NON-ANTIGEN
IRGWIFGTTLDSKTQSLLIVNNATNVVIKVCEFQFCND	0.0189	NON-ANTIGEN
ALNTLVKQLSSNFGAISSVLNDILSRLDKVEAEVQIDR	0.018	NON-ANTIGEN
TLVKQLSSNFGAISSVLNDILSRLDKVEAEVQIDRLIT	-0.0071	NON-ANTIGEN
LNTLVKQLSSNFGAISSVLNDILSRLDKVEAEVQIDRL	-0.0095	NON-ANTIGEN
LVKQLSSNFGAISSVLNDILSRLDKVEAEVQIDRLITG	-0.0105	NON-ANTIGEN
YNYLYRLFRKSNLKPFERDISTEIYQAGSTPCNGVEGF	-0.0333	NON-ANTIGEN
NTLVKQLSSNFGAISSVLNDILSRLDKVEAEVQIDRLI	-0.0725	NON-ANTIGEN
