# Supplementary material for: Identification of vaccine targets & design of vaccine against SARS-CoV-2 coronavirus using computational and deep learning-based approaches
Source: PeerJ. 2022 May 19;10:e13380. doi: 10.7717/peerj.13380 (PMC9124463; doi:10.7717/peerj.13380)
Supplement: Supplemental Information 10 [file peerj-10-13380-s010.xlsx]

## Sheet: Tool-IEDB MHC-II
HTL epitopes as predicted by IEDB MHC-II server	Antigen/ Non-Antigen	Score
QPYRVVVLSFELLHA	ANTIGEN	0.9109
PYRVVVLSFELLHAP	ANTIGEN	0.8161
RVVVLSFELLHAPAT	ANTIGEN	0.7485
YRVVVLSFELLHAPA	ANTIGEN	0.7072
PINLVRDLPQGFSAL	ANTIGEN	0.6086
INLVRDLPQGFSALE	ANTIGEN	0.5842
KHTPINLVRDLPQGF	ANTIGEN	0.5644
GINITRFQTLLALHR	ANTIGEN	0.5582
TPINLVRDLPQGFSA	ANTIGEN	0.5531		Antigen used in vaccine construct	VaxiJen score
NCTFEYVSQPFLMDL	ANTIGEN	0.5206		VKNKCVNFN	2.053
LSFELLHAPATVCGP	ANTIGEN	0.5062
TRFASVYAWNRKRIS	ANTIGEN	0.4963
VLSFELLHAPATVCG	ANTIGEN	0.4784
RFASVYAWNRKRISN	ANTIGEN	0.4243
INITRFQTLLALHRS	ANTIGEN	0.4118
HTPINLVRDLPQGFS	NON-ANTIGEN	0.397
ATRFASVYAWNRKRI	NON-ANTIGEN	0.3489
NITRFQTLLALHRSY	NON-ANTIGEN	0.1775
ITRFQTLLALHRSYL	NON-ANTIGEN	0.1131

## Sheet: Tool-NetMHCII pan 4.0 server
MHC molecule	HTL Epitopes predicted by NetMHCIIpan 4.0 server	Core_Rel	Score_EL	%Rank_EL	Bind_level	VaxiJen score	Probable Antigen/ Non-Antigen
DRB1_0101	PTKLNDLCF	0.38	0.000345	93.15		2.5304	ANTIGEN
DRB1_0101	VKNKCVNFN	0.28	0.000668	84.26		2.053	ANTIGEN		Antigen used in vaccine construct	VaxiJen score
DRB1_0101	LNDLCFTNV	0.533	0.000497	88.83		2.0179	ANTIGEN		VKNKCVNFN	2.053
DRB1_0101	PDVDLGDIS	0.42	0.000394	91.73		2.0111	ANTIGEN
DRB1_0101	LDITPCSFG	0.36	0.000809	80.9		1.982	ANTIGEN
DRB1_0101	CVNLTTRTQ	0.28	0.000449	90.14		1.8792	ANTIGEN
DRB1_0101	KRVDFCGKG	0.38	0.00021	95		1.8649	ANTIGEN
DRB1_0101	CVNFNFNGL	0.253	0.000347	93.09		1.7985	ANTIGEN
DRB1_0101	GQSKRVDFC	0.3	0.000121	95		1.779	ANTIGEN
DRB1_0101	YRFNGIGVT	0.333	0.002351	58.46		1.7692	ANTIGEN
DRB1_0101	VSSQCVNLT	0.54	0.00196	62.4		1.741	ANTIGEN
DRB1_0101	FQTRAGCLI	0.587	0.022892	21.66		1.7332	ANTIGEN
DRB1_0101	VFQTRAGCL	0.56	0.000944	78		1.7094	ANTIGEN
DRB1_0101	KIADYNYKL	0.487	0.001766	64.58		1.6639	ANTIGEN
DRB1_0101	IAPGQTGKI	0.927	0.059807	13.3		1.6527	ANTIGEN
DRB1_0101	PQTLEILDI	0.453	0.003375	50.96		1.6404	ANTIGEN
DRB1_0101	LEILDITPC	0.633	0.004002	47.46		1.639	ANTIGEN
DRB1_0101	YGVSPTKLN	0.507	0.006921	37.74		1.6382	ANTIGEN
DRB1_0101	ILPVSMTKT	0.66	0.003825	48.35		1.6225	ANTIGEN
DRB1_0101	YQDVNCTEV	0.727	0.009981	32.09		1.6172	ANTIGEN
DRB1_0101	LGDIAARDL	0.527	0.003673	49.16		1.6038	ANTIGEN
DRB1_0101	MTKTSVDCT	0.28	0.000346	93.12		1.5951	ANTIGEN
DRB1_0101	TEILPVSMT	0.533	0.003767	48.66		1.5697	ANTIGEN
DRB1_0101	HTSPDVDLG	0.327	0.000408	91.33		1.5209	ANTIGEN
DRB1_0101	VVFLHVTYV	0.827	0.013124	28.23		1.5122	ANTIGEN
DRB1_0101	FKCYGVSPT	0.7	0.010431	31.45		1.5114	ANTIGEN
DRB1_0101	VNFNFNGLT	0.48	0.00063	85.19		1.5069	ANTIGEN
DRB1_0101	DLCFTNVYA	0.5	0.002367	58.32		1.4817	ANTIGEN
DRB1_0101	YYVGYLQPR	0.52	0.005162	42.68		1.4692	ANTIGEN
DRB1_0101	VSPTKLNDL	0.347	0.000283	94.94		1.461	ANTIGEN
DRB1_0101	LMDLEGKQG	0.607	0.087561	10.72		1.4394	ANTIGEN
DRB1_0101	VGYQPYRVV	0.333	0.005891	40.36		1.4383	ANTIGEN
DRB1_0101	CYGVSPTKL	0.333	0.008494	34.49		1.4263	ANTIGEN
DRB1_0101	QYIKWPWYI	0.347	0.000638	84.98		1.4177	ANTIGEN
DRB1_0101	PVSMTKTSV	0.4	0.001234	72.47		1.4129	ANTIGEN
DRB1_0101	QTGKIADYN	0.46	0.00089	79.11		1.3878	ANTIGEN
DRB1_0101	ITPCSFGGV	0.4	0.000656	84.55		1.3871	ANTIGEN
DRB1_0101	VDLPIGINI	0.54	0.010033	32.02		1.3808	ANTIGEN
DRB1_0101	LVDLPIGIN	0.353	0.007252	37		1.3714	ANTIGEN
DRB1_0101	GVGYQPYRV	0.52	0.00182	63.98		1.3587	ANTIGEN
DRB1_0101	VNLTTRTQL	0.627	0.001255	72.1		1.3468	ANTIGEN
DRB1_0101	IGINITRFQ	0.453	0.001209	72.9		1.3386	ANTIGEN
DRB1_0101	FLHVTYVPA	0.807	0.136833	8.12		1.3346	ANTIGEN
DRB1_0101	LVKNKCVNF	0.72	0.003359	51.06		1.3263	ANTIGEN
DRB1_0101	LLLQYGSFC	0.493	0.000247	95		1.326	ANTIGEN
DRB1_0101	LEGKQGNFK	0.72	0.000915	78.6		1.3187	ANTIGEN
DRB1_0101	VDLGDISGI	0.54	0.001266	71.91		1.3158	ANTIGEN
DRB1_0101	VVIGIVNNT	0.527	0.001862	63.5		1.3063	ANTIGEN
DRB1_0101	LDPLSETKC	0.647	0.001492	68.35		1.2825	ANTIGEN
DRB1_0101	FGGFNFSQI	0.553	0.001236	72.43		1.273	ANTIGEN
DRB1_0101	VTLADAGFI	0.94	0.021524	22.29		1.2653	ANTIGEN
DRB1_0101	CSFGGVSVI	0.187	0.000852	79.9		1.263	ANTIGEN
DRB1_0101	IGAEHVNNS	0.327	0.00393	47.81		1.2611	ANTIGEN
DRB1_0101	VGYLQPRTF	0.553	0.005641	41.08		1.2441	ANTIGEN
DRB1_0101	EPVLKGVKL	0.693	0.002482	57.33		1.2301	ANTIGEN
DRB1_0101	RTQLPPAYT	0.287	0.000783	81.52		1.2195	ANTIGEN
DRB1_0101	RFPNITNLC	0.347	0.003366	51.02		1.2172	ANTIGEN
DRB1_0101	FNGIGVTQN	0.607	0.015631	25.97		1.2116	ANTIGEN
DRB1_0101	LSSNFGAIS	0.667	0.015276	26.27		1.2091	ANTIGEN
DRB1_0101	DIPIGAGIC	0.46	0.001028	76.26		1.1965	ANTIGEN
DRB1_0101	INASVVNIQ	0.633	0.016722	25.2		1.1445	ANTIGEN
DRB1_0101	CDVVIGIVN	0.407	0.00065	84.69		1.1423	ANTIGEN
DRB1_0101	LTPTWRVYS	0.493	0.002324	58.69		1.1258	ANTIGEN
DRB1_0101	LIAIVMVTI	0.347	0.000104	95		1.1121	ANTIGEN
DRB1_0101	SNNLDSKVG	0.447	0.000674	84.12		1.1048	ANTIGEN
DRB1_0101	VVVLSFELL	0.46	0.002556	56.69		1.0909	ANTIGEN
DRB1_0101	DIADTTDAV	0.313	0.005357	42.02		1.0904	ANTIGEN
DRB1_0101	VLSFELLHA	0.42	0.006087	39.81		1.0776	ANTIGEN
DRB1_0101	EHVNNSYEC	0.473	0.000796	81.21		1.068	ANTIGEN
DRB1_0101	LQIPFAMQM	0.633	0.005432	41.77		1.068	ANTIGEN
DRB1_0101	FNCYFPLQS	0.62	0.000372	92.37		1.0649	ANTIGEN
DRB1_0101	GKQGNFKNL	0.267	0.000454	90		1.0607	ANTIGEN
DRB1_0101	YSKHTPINL	0.573	0.051133	14.49		1.0547	ANTIGEN
DRB1_0101	YGFQPTNGV	0.827	0.016011	25.7		1.0509	ANTIGEN
DRB1_0101	VRDLPQGFS	0.42	0.002389	58.13		1.0501	ANTIGEN
DRB1_0101	KWPWYIWLG	0.2	0.000444	90.29		1.0478	ANTIGEN
DRB1_0101	WNSNNLDSK	0.48	0.001947	62.55		1.0425	ANTIGEN
DRB1_0101	WYIWLGFIA	0.64	0.001262	71.98		1.0356	ANTIGEN
DRB1_0101	ESNKKFLPF	0.227	0.000347	93.09		1.0278	ANTIGEN
DRB1_0101	FAMQMAYRF	0.74	0.017546	24.61		1.0278	ANTIGEN
DRB1_0101	IAYTMSLGA	0.78	0.023342	21.46		1.0212	ANTIGEN
DRB1_0101	REGVFVSNG	0.173	0.001394	69.73		1.0165	ANTIGEN
DRB1_0101	VTTEILPVS	0.547	0.001693	65.51		1.0163	ANTIGEN
DRB1_0101	ITPGTNTSN	0.767	0.003901	47.96		1.0158	ANTIGEN
DRB1_0101	FASTEKSNI	0.4	0.021045	22.53		1.0137	ANTIGEN
DRB1_0101	LNESLIDLQ	0.52	0.000888	79.15		1.0001	ANTIGEN
DRB1_0101	IAARDLICA	0.387	0.000787	81.43		0.9915	ANTIGEN
DRB1_0101	PQGFSALEP	0.193	0.000356	92.83		0.991	ANTIGEN
DRB1_0101	VSGTNGTKR	0.58	0.003568	49.75		0.9855	ANTIGEN
DRB1_0101	VYFASTEKS	0.767	0.007008	37.54		0.9773	ANTIGEN
DRB1_0101	LVSSQCVNL	0.74	0.010633	31.17		0.9764	ANTIGEN
DRB1_0101	YTMSLGAEN	0.833	0.128	8.47		0.9735	ANTIGEN
DRB1_0101	FLGVYYHKN	0.687	0.001504	68.18		0.9675	ANTIGEN
DRB1_0101	YFASTEKSN	0.387	0.0612	13.11		0.9639	ANTIGEN
DRB1_0101	KSNLKPFER	0.293	0.000743	82.48		0.949	ANTIGEN
DRB1_0101	FRVQPTESI	0.973	0.061676	13.04		0.9396	ANTIGEN
DRB1_0101	AGICASYQT	0.5	0.000735	82.67		0.934	ANTIGEN
DRB1_0101	FHAIHVSGT	0.667	0.227702	5.66		0.9305	ANTIGEN
DRB1_0101	ICASYQTQT	0.38	0.000516	88.31		0.9262	ANTIGEN
DRB1_0101	LIDLQELGK	0.553	0.001688	65.58		0.9206	ANTIGEN
DRB1_0101	LSSTASALG	0.807	0.020771	22.67		0.9155	ANTIGEN
DRB1_0101	VLYQDVNCT	0.4	0.002858	54.31		0.9146	ANTIGEN
DRB1_0101	YGSFCTQLN	0.72	0.002178	59.96		0.9142	ANTIGEN
DRB1_0101	CVLGQSKRV	0.38	0.001393	69.75		0.9083	ANTIGEN
DRB1_0101	LKYNENGTI	0.647	0.007512	36.4		0.9066	ANTIGEN
DRB1_0101	YFKIYSKHT	0.92	0.021762	22.17		0.9056	ANTIGEN
DRB1_0101	LTGIAVEQD	0.827	0.016	25.71		0.8891	ANTIGEN
DRB1_0101	SVAYSNNSI	0.367	0.002104	60.78		0.8783	ANTIGEN
DRB1_0101	YVPAQEKNF	0.593	0.026985	20.04		0.8731	ANTIGEN
DRB1_0101	YEQYIKWPW	0.453	0.000649	84.71		0.869	ANTIGEN
DRB1_0101	TASALGKLQ	0.567	0.00093	78.29		0.8689	ANTIGEN
DRB1_0101	VRQIAPGQT	0.527	0.004888	43.71		0.8675	ANTIGEN
DRB1_0101	IHVSGTNGT	0.56	0.026926	20.06		0.8621	ANTIGEN
DRB1_0101	VAYSNNSIA	0.607	0.003738	48.81		0.8537	ANTIGEN
DRB1_0101	FTISVTTEI	0.873	0.007763	35.86		0.8535	ANTIGEN
DRB1_0101	QGFSALEPL	0.367	0.000472	89.51		0.8462	ANTIGEN
DRB1_0101	VNCTEVPVA	0.62	0.003644	49.32		0.8346	ANTIGEN
DRB1_0101	YEPQIITTD	0.48	0.020663	22.73		0.8297	ANTIGEN
DRB1_0101	SALGKLQDV	0.3	0.000927	78.35		0.8291	ANTIGEN
DRB1_0101	LITGRLQSL	0.627	0.007852	35.69		0.8238	ANTIGEN
DRB1_0101	YAWNRKRIS	0.493	0.002425	57.82		0.8209	ANTIGEN
DRB1_0101	ITNLCPFGE	0.693	0.000898	78.95		0.8187	ANTIGEN
DRB1_0101	EIRASANLA	0.707	0.019905	23.13		0.8135	ANTIGEN
DRB1_0101	VTYVPAQEK	0.48	0.011315	30.24		0.8132	ANTIGEN
DRB1_0101	LDSKTQSLL	0.553	0.000979	77.27		0.8027	ANTIGEN
DRB1_0101	DDSEPVLKG	0.48	0.000981	77.23		0.798	ANTIGEN
DRB1_0101	VNNSYECDI	0.48	0.000384	92.02		0.7935	ANTIGEN
DRB1_0101	LTGTGVLTE	0.32	0.002605	56.26		0.7881	ANTIGEN
DRB1_0101	LDSKVGGNY	0.673	0.001193	73.18		0.7814	ANTIGEN
DRB1_0101	VIGIVNNTV	0.52	0.005392	41.91		0.7774	ANTIGEN
DRB1_0101	LHRSYLTPG	0.473	0.002859	54.3		0.7761	ANTIGEN
DRB1_0101	AALQIPFAM	0.473	0.00347	50.34		0.7747	ANTIGEN
DRB1_0101	YNENGTITD	0.447	0.004295	46.09		0.765	ANTIGEN
DRB1_0101	LLPLVSSQC	0.687	0.02056	22.78		0.7587	ANTIGEN
DRB1_0101	LTPGDSSSG	0.533	0.002601	56.3		0.7579	ANTIGEN
DRB1_0101	DQLTPTWRV	0.673	0.002667	55.73		0.7445	ANTIGEN
DRB1_0101	VGGNYNYLY	0.447	0.000722	82.98		0.7432	ANTIGEN
DRB1_0101	WFVTQRNFY	0.413	0.006074	39.85		0.7376	ANTIGEN
DRB1_0101	VVNIQKEID	0.373	0.002209	59.69		0.7227	ANTIGEN
DRB1_0101	VIAWNSNNL	0.82	0.019252	23.51		0.7216	ANTIGEN
DRB1_0101	VDCALDPLS	0.573	0.002143	60.34		0.707	ANTIGEN
DRB1_0101	IAIPTNFTI	0.36	0.002426	57.81		0.7052	ANTIGEN
DRB1_0101	SANLAATKM	0.433	0.011258	30.31		0.703	ANTIGEN
DRB1_0101	VRDPQTLEI	0.36	0.001163	73.71		0.7025	ANTIGEN
DRB1_0101	GCLIGAEHV	0.547	0.003146	52.44		0.7002	ANTIGEN
DRB1_0101	IIAYTMSLG	0.307	0.004524	45.1		0.6986	ANTIGEN
DRB1_0101	SKPSKRSFI	0.393	9.2e-05	95		0.691	ANTIGEN
DRB1_0101	FNKVTLADA	0.313	0.005847	40.48		0.69	ANTIGEN
DRB1_0101	LSETKCTLK	0.487	0.000448	90.17		0.6883	ANTIGEN
DRB1_0101	IGVTQNVLY	0.653	0.004061	47.18		0.6715	ANTIGEN
DRB1_0101	LTVLPPLLT	0.927	0.182565	6.67		0.6677	ANTIGEN
DRB1_0101	FNGLTGTGV	0.993	0.202487	6.19		0.6673	ANTIGEN
DRB1_0101	AGCLIGAEH	0.42	0.001738	64.9		0.6535	ANTIGEN
DRB1_0101	SWMESEFRV	0.36	0.002297	58.93		0.651	ANTIGEN
DRB1_0101	SALLAGTIT	0.393	0.006212	39.49		0.6456	ANTIGEN
DRB1_0101	YECDIPIGA	0.947	0.01583	25.83		0.6385	ANTIGEN
DRB1_0101	FGAGAALQI	0.567	0.402072	3.39	<=WB	0.6377	ANTIGEN
DRB1_0101	IGAGICASY	0.487	0.002049	61.4		0.6368	ANTIGEN
DRB1_0101	FEYVSQPFL	0.68	0.00089	79.11		0.6324	ANTIGEN
DRB1_0101	WTAGAAAYY	0.693	0.006923	37.73		0.6306	ANTIGEN
DRB1_0101	FRKSNLKPF	0.547	0.003803	48.47		0.628	ANTIGEN
DRB1_0101	FTRGVYYPD	0.367	0.006084	39.82		0.6229	ANTIGEN
DRB1_0101	FGTTLDSKT	0.32	0.000742	82.5		0.6164	ANTIGEN
DRB1_0101	LLFNKVTLA	0.913	0.013832	27.55		0.615	ANTIGEN
DRB1_0101	FLMDLEGKQ	0.42	0.002231	59.5		0.6124	ANTIGEN
DRB1_0101	FGGVSVITP	0.42	0.00196	62.4		0.6041	ANTIGEN
DRB1_0101	THWFVTQRN	0.5	0.000921	78.47		0.6024	ANTIGEN
DRB1_0101	NVLYENQKL	0.387	0.002912	53.96		0.6017	ANTIGEN
DRB1_0101	YQPYRVVVL	0.833	0.042022	15.98		0.5964	ANTIGEN
DRB1_0101	FFSNVTWFH	0.567	0.004386	45.69		0.5951	ANTIGEN
DRB1_0101	DSKTQSLLI	0.547	0.002769	54.88		0.5911	ANTIGEN
DRB1_0101	YLTPGDSSS	0.24	0.001551	67.51		0.5905	ANTIGEN
DRB1_0101	LADAGFIKQ	0.573	0.000544	87.54		0.5856	ANTIGEN
DRB1_0101	YDPLQPELD	0.953	0.036828	17.16		0.5835	ANTIGEN
DRB1_0101	FNFSQILPD	0.713	0.010519	31.33		0.5831	ANTIGEN
DRB1_0101	LGDISGINA	0.867	0.028052	19.67		0.5772	ANTIGEN
DRB1_0101	ASTEKSNII	0.56	0.001166	73.65		0.5761	ANTIGEN
DRB1_0101	FNATRFASV	0.567	0.003425	50.63		0.5609	ANTIGEN
DRB1_0101	FLLKYNENG	0.647	0.002798	54.7		0.5595	ANTIGEN
DRB1_0101	GTITDAVDC	0.52	0.000479	89.32		0.5522	ANTIGEN
DRB1_0101	FPREGVFVS	0.46	0.001612	66.65		0.5509	ANTIGEN
DRB1_0101	YTSALLAGT	0.533	0.013102	28.25		0.5487	ANTIGEN
DRB1_0101	YSNNSIAIP	0.413	0.002373	58.27		0.5477	ANTIGEN
DRB1_0101	FGAISSVLN	0.76	0.01444	26.99		0.5435	ANTIGEN
DRB1_0101	VTWFHAIHV	0.673	0.020666	22.72		0.5426	ANTIGEN
DRB1_0101	FELLHAPAT	0.993	0.231243	5.59		0.5409	ANTIGEN
DRB1_0101	VLTESNKKF	0.44	0.000885	79.21		0.5392	ANTIGEN
DRB1_0101	IRAAEIRAS	0.547	0.014671	26.8		0.5366	ANTIGEN
DRB1_0101	NRALTGIAV	0.647	0.006266	39.34		0.5302	ANTIGEN
DRB1_0101	ITDAVDCAL	0.5	0.001403	69.6		0.526	ANTIGEN
DRB1_0101	QDSLSSTAS	0.307	0.005582	41.28		0.5245	ANTIGEN
DRB1_0101	TNTSNQVAV	0.093	0.000817	80.71		0.5203	ANTIGEN
DRB1_0101	AAYYVGYLQ	0.367	0.001693	65.51		0.5177	ANTIGEN
DRB1_0101	FCTQLNRAL	0.78	0.00917	33.34		0.5159	ANTIGEN
DRB1_0101	YFPLQSYGF	0.8	0.025531	20.58		0.5107	ANTIGEN
DRB1_0101	FCGKGYHLM	0.493	0.000385	91.99		0.5098	ANTIGEN
DRB1_0101	TQSLLIVNN	0.2	0.001819	63.99		0.5071	ANTIGEN
DRB1_0101	WNRKRISNC	0.627	0.001893	63.15		0.5059	ANTIGEN
DRB1_0101	LDKVEAEVQ	0.82	0.004585	44.86		0.5017	ANTIGEN
DRB1_0101	YQAGSTPCN	0.38	0.001481	68.5		0.4992	ANTIGEN
DRB1_0101	EKNFTTAPA	0.4	0.002045	61.44		0.4978	ANTIGEN
DRB1_0101	WRVYSTGSN	0.38	0.002138	60.39		0.4976	ANTIGEN
DRB1_0101	ISGINASVV	0.827	0.082237	11.11		0.4934	ANTIGEN
DRB1_0101	WTFGAGAAL	0.7	0.025392	20.64		0.4918	ANTIGEN
DRB1_0101	IADTTDAVR	0.5	0.007601	36.2		0.4911	ANTIGEN
DRB1_0101	KKSTNLVKN	0.327	0.000269	95		0.4876	ANTIGEN
DRB1_0101	FKNHTSPDV	0.82	0.0951	10.19		0.4846	ANTIGEN
DRB1_0101	PRRARSVAS	0.787	0.003149	52.42		0.4829	ANTIGEN
DRB1_0101	YNYKLPDDF	0.74	0.005039	43.12		0.4828	ANTIGEN
DRB1_0101	QSLLIVNNA	0.493	0.002748	55.03		0.4826	ANTIGEN
DRB1_0101	IAVEQDKNT	0.607	0.00696	37.65		0.4823	ANTIGEN
DRB1_0101	FLPFQQFGR	0.467	0.002923	53.89		0.4802	ANTIGEN
DRB1_0101	VVNQNAQAL	0.987	0.27058	4.93	<=WB	0.4749	ANTIGEN
DRB1_0101	IITTDNTFV	0.827	0.010136	31.87		0.4733	ANTIGEN
DRB1_0101	IAGLIAIVM	0.753	0.011288	30.27		0.4716	ANTIGEN
DRB1_0101	FCNDPFLGV	0.513	0.000287	94.83		0.4693	ANTIGEN
DRB1_0101	MESEFRVYS	0.56	0.001513	68.05		0.4652	ANTIGEN
DRB1_0101	VLPFNDGVY	0.62	0.000821	80.62		0.4642	ANTIGEN
DRB1_0101	ITSGWTFGA	0.347	0.000568	86.89		0.4577	ANTIGEN
DRB1_0101	AENSVAYSN	0.387	0.000967	77.52		0.4563	ANTIGEN
DRB1_0101	LAATKMSEC	0.593	0.000943	78.02		0.4556	ANTIGEN
DRB1_0101	LLAGTITSG	0.533	0.002941	53.77		0.4552	ANTIGEN
DRB1_0101	ADTTDAVRD	0.46	0.000623	85.38		0.4548	ANTIGEN
DRB1_0101	YLQPRTFLL	0.613	0.03574	17.43		0.4532	ANTIGEN
DRB1_0101	VYYHKNNKS	0.7	0.007235	37.03		0.451	ANTIGEN
DRB1_0101	LGKLQDVVN	0.667	0.002253	59.31		0.4464	ANTIGEN
DRB1_0101	IRASANLAA	0.607	0.0786	11.41		0.4455	ANTIGEN
DRB1_0101	IQDSLSSTA	0.507	0.005195	42.57		0.4433	ANTIGEN
DRB1_0101	FLPFFSNVT	0.66	0.002467	57.46		0.44	ANTIGEN
DRB1_0101	TSNQVAVLY	0.48	0.00137	70.09		0.4387	ANTIGEN
DRB1_0101	PGTNTSNQV	0.2	0.001248	72.22		0.4377	ANTIGEN
DRB1_0101	VLYENQKLI	0.693	0.016231	25.55		0.4361	ANTIGEN
DRB1_0101	DFCGKGYHL	0.48	0.000559	87.13		0.4337	ANTIGEN
DRB1_0101	LKPFERDIS	0.627	0.001751	64.75		0.4333	ANTIGEN
DRB1_0101	TSALLAGTI	0.487	0.016071	25.66		0.4292	ANTIGEN
DRB1_0101	KSWMESEFR	0.493	0.000884	79.24		0.4287	ANTIGEN
DRB1_0101	FLVLLPLVS	0.787	0.01268	28.69		0.4266	ANTIGEN
DRB1_0101	CNGVEGFNC	0.32	0.000284	94.91		0.4188	ANTIGEN
DRB1_0101	LGAENSVAY	0.727	0.005728	40.82		0.4173	ANTIGEN
DRB1_0101	FSTFKCYGV	0.713	0.00284	54.42		0.414	ANTIGEN
DRB1_0101	QGNFKNLRE	0.333	0.000468	89.62		0.409	ANTIGEN
DRB1_0101	VLYNSASFS	0.493	0.041992	15.99		0.4029	ANTIGEN
DRB1_0101	FYEPQIITT	0.527	0.005793	40.64		0.4027	ANTIGEN
DRB1_0101	KNFTTAPAI	0.44	0.001858	63.55		0.4016	ANTIGEN
DRB1_0101	FDEDDSEPV	0.773	0.000607	85.82		0.3937	NON-ANTIGEN
DRB1_0101	INITRFQTL	0.367	0.001796	64.25		0.3934	NON-ANTIGEN
DRB1_0101	FNGLTVLPP	0.74	0.010097	31.92		0.3867	NON-ANTIGEN
DRB1_0101	YFKNHTSPD	0.44	0.014175	27.24		0.3867	NON-ANTIGEN
DRB1_0101	FTTAPAICH	0.78	0.031677	18.52		0.3761	NON-ANTIGEN
DRB1_0101	AKNLNESLI	0.313	0.00186	63.52		0.3737	NON-ANTIGEN
DRB1_0101	LGKYEQYIK	0.273	0.000781	81.57		0.3613	NON-ANTIGEN
DRB1_0101	VNNATNVVI	0.307	0.000708	83.31		0.3557	NON-ANTIGEN
DRB1_0101	PHGVVFLHV	0.527	0.001334	70.72		0.3513	NON-ANTIGEN
DRB1_0101	LHSTQDLFL	0.667	0.002386	58.16		0.3504	NON-ANTIGEN
DRB1_0101	HFPREGVFV	0.447	0.001007	76.69		0.3482	NON-ANTIGEN
DRB1_0101	LSRLDKVEA	0.82	0.004084	47.06		0.3462	NON-ANTIGEN
DRB1_0101	YHKNNKSWM	0.613	0.005123	42.81		0.3388	NON-ANTIGEN
DRB1_0101	RDLICAQKF	0.34	0.000821	80.62		0.3381	NON-ANTIGEN
DRB1_0101	FRSSVLHST	0.74	0.028415	19.55		0.3365	NON-ANTIGEN
DRB1_0101	IVRFPNITN	0.62	0.002081	61.04		0.3351	NON-ANTIGEN
DRB1_0101	QNAQALNTL	0.42	0.004526	45.09		0.3288	NON-ANTIGEN
DRB1_0101	RNFYEPQII	0.313	0.002363	58.36		0.3282	NON-ANTIGEN
DRB1_0101	FVTQRNFYE	0.66	0.024946	20.8		0.3219	NON-ANTIGEN
DRB1_0101	LQELGKYEQ	0.48	0.000941	78.06		0.319	NON-ANTIGEN
DRB1_0101	VKQLSSNFG	0.5	0.004984	43.33		0.3182	NON-ANTIGEN
DRB1_0101	LTESNKKFL	0.347	0.000622	85.41		0.3167	NON-ANTIGEN
DRB1_0101	KCTLKSFTV	0.473	0.000484	89.18		0.3125	NON-ANTIGEN
DRB1_0101	FQPTNGVGY	0.707	0.135836	8.16		0.3114	NON-ANTIGEN
DRB1_0101	IYQTSNFRV	0.82	0.007565	36.28		0.3109	NON-ANTIGEN
DRB1_0101	GDSSSGWTA	0.207	0.001125	74.37		0.3077	NON-ANTIGEN
DRB1_0101	TECSNLLLQ	0.24	0.000161	95		0.3027	NON-ANTIGEN
DRB1_0101	SVASQSIIA	0.467	0.005163	42.68		0.2882	NON-ANTIGEN
DRB1_0101	CSNLLLQYG	0.407	0.000195	95		0.285	NON-ANTIGEN
DRB1_0101	KRFDNPVLP	0.28	0.004376	45.73		0.2834	NON-ANTIGEN
DRB1_0101	LALHRSYLT	0.673	0.021566	22.27		0.2825	NON-ANTIGEN
DRB1_0101	IHADQLTPT	0.413	0.008672	34.17		0.2821	NON-ANTIGEN
DRB1_0101	YADSFVIRG	0.653	0.014613	26.85		0.2816	NON-ANTIGEN
DRB1_0101	VITPGTNTS	0.307	0.005924	40.26		0.2753	NON-ANTIGEN
DRB1_0101	QQLIRAAEI	0.747	0.044033	15.62		0.2742	NON-ANTIGEN
DRB1_0101	IEDLLFNKV	0.367	0.001439	69.1		0.2737	NON-ANTIGEN
DRB1_0101	EQDKNTQEV	0.26	0.000781	81.57		0.2717	NON-ANTIGEN
DRB1_0101	KQIYKTPPI	0.487	0.002095	60.88		0.2705	NON-ANTIGEN
DRB1_0101	WMESEFRVY	0.427	0.001931	62.73		0.2698	NON-ANTIGEN
DRB1_0101	TEVPVAIHA	0.513	0.002155	60.2		0.2687	NON-ANTIGEN
DRB1_0101	QVAVLYQDV	0.42	0.000696	83.6		0.265	NON-ANTIGEN
DRB1_0101	IKDFGGFNF	0.66	0.001272	71.8		0.2649	NON-ANTIGEN
DRB1_0101	RVYSTGSNV	0.42	0.015071	26.45		0.2636	NON-ANTIGEN
DRB1_0101	SQSIIAYTM	0.467	0.002297	58.93		0.2614	NON-ANTIGEN
DRB1_0101	IGKIQDSLS	0.873	0.007596	36.21		0.2601	NON-ANTIGEN
DRB1_0101	IVMVTIMLC	0.487	7.1e-05	95		0.2528	NON-ANTIGEN
DRB1_0101	EVFAQVKQI	0.62	0.004672	44.54		0.2447	NON-ANTIGEN
DRB1_0101	VNNTVYDPL	0.533	0.001743	64.84		0.2397	NON-ANTIGEN
DRB1_0101	VTIMLCCMT	0.273	0.000165	95		0.2373	NON-ANTIGEN
DRB1_0101	QSAPHGVVF	0.193	0.001521	67.94		0.2234	NON-ANTIGEN
DRB1_0101	AHFPREGVF	0.133	0.000416	91.1		0.2229	NON-ANTIGEN
DRB1_0101	CCSCGSCCK	0.147	2.9e-05	95		0.2193	NON-ANTIGEN
DRB1_0101	DKNTQEVFA	0.313	0.000868	79.57		0.2163	NON-ANTIGEN
DRB1_0101	PLLTDEMIA	0.22	0.000473	89.48		0.2127	NON-ANTIGEN
DRB1_0101	EVFNATRFA	0.347	0.000986	77.13		0.2087	NON-ANTIGEN
DRB1_0101	PVAIHADQL	0.653	0.005078	42.97		0.2064	NON-ANTIGEN
DRB1_0101	FQTLLALHR	0.913	0.173657	6.91		0.2055	NON-ANTIGEN
DRB1_0101	LNEVAKNLN	0.4	0.003052	53.05		0.2022	NON-ANTIGEN
DRB1_0101	NLCPFGEVF	0.2	0.000492	88.96		0.1999	NON-ANTIGEN
DRB1_0101	NTQEVFAQV	0.347	0.002061	61.26		0.197	NON-ANTIGEN
DRB1_0101	LIVNNATNV	0.207	0.016406	25.42		0.1942	NON-ANTIGEN
DRB1_0101	FNSAIGKIQ	1	0.246643	5.32		0.1896	NON-ANTIGEN
DRB1_0101	RFDNPVLPF	0.267	0.003716	48.93		0.1828	NON-ANTIGEN
DRB1_0101	RLNEVAKNL	0.293	0.006115	39.74		0.182	NON-ANTIGEN
DRB1_0101	TKRFDNPVL	0.433	0.000222	95		0.1808	NON-ANTIGEN
DRB1_0101	TKMSECVLG	0.56	0.000844	80.07		0.1761	NON-ANTIGEN
DRB1_0101	SASFSTFKC	0.233	0.000891	79.09		0.1686	NON-ANTIGEN
DRB1_0101	KKFLPFQQF	0.573	0.000612	85.68		0.1647	NON-ANTIGEN
DRB1_0101	ICHDGKAHF	0.28	0.000817	80.71		0.1567	NON-ANTIGEN
DRB1_0101	WLGFIAGLI	0.553	0.005128	42.8		0.1544	NON-ANTIGEN
DRB1_0101	LKGCCSCGS	0.56	1.9e-05	95		0.151	NON-ANTIGEN
DRB1_0101	AQKFNGLTV	0.327	0.000844	80.07		0.1405	NON-ANTIGEN
DRB1_0101	FAQVKQIYK	0.58	0.023943	21.21		0.1399	NON-ANTIGEN
DRB1_0101	YHLMSFPQS	0.893	0.00512	42.82		0.1372	NON-ANTIGEN
DRB1_0101	VASQSIIAY	0.493	0.003692	49.06		0.1366	NON-ANTIGEN
DRB1_0101	CGPKKSTNL	0.307	0.000364	92.6		0.1363	NON-ANTIGEN
DRB1_0101	SNNSIAIPT	0.52	0.001271	71.82		0.128	NON-ANTIGEN
DRB1_0101	LVRDLPQGF	0.54	0.009924	32.18		0.1234	NON-ANTIGEN
DRB1_0101	YVSQPFLMD	0.487	0.006644	38.39		0.1232	NON-ANTIGEN
DRB1_0101	FSALEPLVD	0.967	0.034758	17.68		0.116	NON-ANTIGEN
DRB1_0101	MIAQYTSAL	0.707	0.01062	31.19		0.1114	NON-ANTIGEN
DRB1_0101	IDRLNEVAK	0.673	0.005428	41.79		0.1081	NON-ANTIGEN
DRB1_0101	LLHAPATVC	0.927	0.717202	1.26	<=WB	0.105	NON-ANTIGEN
DRB1_0101	NSPRRARSV	0.413	0.001498	68.26		0.1034	NON-ANTIGEN
DRB1_0101	IYKTPPIKD	0.567	0.01132	30.23		0.0905	NON-ANTIGEN
DRB1_0101	SSGWTAGAA	0.36	0.001203	73.01		0.09	NON-ANTIGEN
DRB1_0101	ATKMSECVL	0.453	0.000677	84.05		0.0899	NON-ANTIGEN
DRB1_0101	IAQYTSALL	0.78	0.101516	9.79		0.0823	NON-ANTIGEN
DRB1_0101	FVSNGTHWF	0.44	0.002533	56.89		0.0807	NON-ANTIGEN
DRB1_0101	TDEMIAQYT	0.167	0.000685	83.86		0.0728	NON-ANTIGEN
DRB1_0101	FASVYAWNR	0.647	0.013305	28.04		0.0713	NON-ANTIGEN
DRB1_0101	VEQDKNTQE	0.52	0.00147	68.66		0.0684	NON-ANTIGEN
DRB1_0101	VSVITPGTN	0.767	0.003659	49.24		0.0551	NON-ANTIGEN
DRB1_0101	LQDVVNQNA	0.673	0.007648	36.1		0.0526	NON-ANTIGEN
DRB1_0101	FKNLREFVF	0.893	0.003593	49.61		0.0523	NON-ANTIGEN
DRB1_0101	YRLFRKSNL	0.72	0.013218	28.13		0.0522	NON-ANTIGEN
DRB1_0101	TNLVKNKCV	0.287	0.0004	91.56		0.0466	NON-ANTIGEN
DRB1_0101	NAQALNTLV	0.413	0.003088	52.82		0.0423	NON-ANTIGEN
DRB1_0101	SVDCTMYIC	0.24	0.0001	95		0.0408	NON-ANTIGEN
DRB1_0101	LIANQFNSA	0.48	0.006648	38.38		0.0376	NON-ANTIGEN
DRB1_0101	WIFGTTLDS	0.393	0.004017	47.39		0.0338	NON-ANTIGEN
DRB1_0101	QDLFLPFFS	0.307	0.000783	81.52		0.0304	NON-ANTIGEN
DRB1_0101	FGRDIADTT	0.633	0.01176	29.7		0.0295	NON-ANTIGEN
DRB1_0101	YENQKLIAN	0.493	0.025891	20.45		0.0293	NON-ANTIGEN
DRB1_0101	YKTPPIKDF	0.38	0.001427	69.27		0.0287	NON-ANTIGEN
DRB1_0101	LKSFTVEKG	0.653	0.002709	55.36		0.0213	NON-ANTIGEN
DRB1_0101	ARSVASQSI	0.687	0.005887	40.37		0.0161	NON-ANTIGEN
DRB1_0101	FDNPVLPFN	0.547	0.002247	59.36		0.0146	NON-ANTIGEN
DRB1_0101	FVIRGDEVR	0.513	0.010688	31.09		0.0083	NON-ANTIGEN
DRB1_0101	MSFPQSAPH	0.24	0.002668	55.72		0.0069	NON-ANTIGEN
DRB1_0101	FPQSAPHGV	0.487	0.002607	56.25		-0.0058	NON-ANTIGEN
DRB1_0101	LEPLVDLPI	0.833	0.047625	14.99		-0.0069	NON-ANTIGEN
DRB1_0101	DNTFVSGNC	0.407	0.000378	92.2		-0.0078	NON-ANTIGEN
DRB1_0101	IANQFNSAI	0.5	0.02104	22.54		-0.01	NON-ANTIGEN
DRB1_0101	CHDGKAHFP	0.447	0.001036	76.1		-0.0132	NON-ANTIGEN
DRB1_0101	PFGEVFNAT	0.207	0.000475	89.43		-0.0193	NON-ANTIGEN
DRB1_0101	VEAEVQIDR	0.273	0.001844	63.7		-0.0275	NON-ANTIGEN
DRB1_0101	CVADYSVLY	0.213	0.001355	70.35		-0.0293	NON-ANTIGEN
DRB1_0101	LIRAAEIRA	0.74	0.113014	9.18		-0.0308	NON-ANTIGEN
DRB1_0101	IYQAGSTPC	0.66	0.00774	35.9		-0.0319	NON-ANTIGEN
DRB1_0101	ANNCTFEYV	0.467	0.000307	94.25		-0.0332	NON-ANTIGEN
DRB1_0101	ISTEIYQAG	0.287	0.007542	36.34		-0.0339	NON-ANTIGEN
DRB1_0101	VQPTESIVR	0.527	0.002086	60.98		-0.0418	NON-ANTIGEN
DRB1_0101	VTQNVLYEN	0.44	0.002011	61.82		-0.049	NON-ANTIGEN
DRB1_0101	CSCGSCCKF	0.507	4.4e-05	95		-0.0512	NON-ANTIGEN
DRB1_0101	LQSLQTYVT	0.787	0.007849	35.7		-0.0592	NON-ANTIGEN
DRB1_0101	FRVYSSANN	0.713	0.008073	35.27		-0.0802	NON-ANTIGEN
DRB1_0101	FNDGVYFAS	0.513	0.00104	76.01		-0.0829	NON-ANTIGEN
DRB1_0101	LICAQKFNG	0.567	0.002104	60.78		-0.1029	NON-ANTIGEN
DRB1_0101	YSSANNCTF	0.393	0.004511	45.15		-0.1036	NON-ANTIGEN
DRB1_0101	IDGYFKIYS	0.327	0.004091	47.03		-0.1037	NON-ANTIGEN
DRB1_0101	YSVLYNSAS	0.9	0.014719	26.75		-0.1049	NON-ANTIGEN
DRB1_0101	FKNIDGYFK	0.627	0.007797	35.8		-0.1054	NON-ANTIGEN
DRB1_0101	FVFKNIDGY	0.347	0.002064	61.23		-0.1304	NON-ANTIGEN
DRB1_0101	LQPELDSFK	0.6	0.000596	86.12		-0.1311	NON-ANTIGEN
DRB1_0101	YGDCLGDIA	0.913	0.019797	23.19		-0.134	NON-ANTIGEN
DRB1_0101	YSTGSNVFQ	0.793	0.012063	29.36		-0.1347	NON-ANTIGEN
DRB1_0101	YKLPDDFTG	0.667	0.001931	62.73		-0.1362	NON-ANTIGEN
DRB1_0101	CKFDEDDSE	0.373	2.3e-05	95		-0.1379	NON-ANTIGEN
DRB1_0101	FSQILPDPS	0.627	0.077265	11.52		-0.1489	NON-ANTIGEN
DRB1_0101	NVVIKVCEF	0.22	0.000304	94.34		-0.1492	NON-ANTIGEN
DRB1_0101	FVSGNCDVV	0.76	0.004985	43.33		-0.1537	NON-ANTIGEN
DRB1_0101	LNDILSRLD	0.373	0.001428	69.25		-0.1643	NON-ANTIGEN
DRB1_0101	ICAQKFNGL	0.587	0.002543	56.8		-0.1645	NON-ANTIGEN
DRB1_0101	YQTQTNSPR	0.607	0.001482	68.49		-0.1787	NON-ANTIGEN
DRB1_0101	DAVRDPQTL	0.333	0.000388	91.91		-0.1803	NON-ANTIGEN
DRB1_0101	AGSTPCNGV	0.473	0.0005	88.74		-0.1944	NON-ANTIGEN
DRB1_0101	FTVEKGIYQ	0.64	0.033593	17.97		-0.1987	NON-ANTIGEN
DRB1_0101	MSECVLGQS	0.353	0.0009	78.9		-0.1998	NON-ANTIGEN
DRB1_0101	GSCCKFDED	0.4	1.4e-05	95		-0.2048	NON-ANTIGEN
DRB1_0101	LQTYVTQQL	0.433	0.01248	28.9		-0.2061	NON-ANTIGEN
DRB1_0101	ILPDPSKPS	0.72	0.070938	12.06		-0.2217	NON-ANTIGEN
DRB1_0101	AQALNTLVK	0.353	0.001763	64.62		-0.2279	NON-ANTIGEN
DRB1_0101	ATNVVIKVC	0.453	0.000515	88.33		-0.2416	NON-ANTIGEN
DRB1_0101	ATVCGPKKS	0.627	0.000415	91.13		-0.2471	NON-ANTIGEN
DRB1_0101	FQFCNDPFL	0.56	0.000504	88.63		-0.2493	NON-ANTIGEN
DRB1_0101	YICGDSTEC	0.653	0.000612	85.68		-0.2526	NON-ANTIGEN
DRB1_0101	CMTSCCSCL	0.213	1.6e-05	95		-0.2528	NON-ANTIGEN
DRB1_0101	TQTNSPRRA	0.473	0.000986	77.13		-0.2615	NON-ANTIGEN
DRB1_0101	YVTQQLIRA	0.827	0.044428	15.55		-0.2814	NON-ANTIGEN
DRB1_0101	FQQFGRDIA	0.473	0.011093	30.54		-0.2818	NON-ANTIGEN
DRB1_0101	VYSTGSNVF	0.413	0.017577	24.59		-0.3099	NON-ANTIGEN
DRB1_0101	TAPAICHDG	0.3	0.000559	87.13		-0.3229	NON-ANTIGEN
DRB1_0101	ITRFQTLLA	0.7	0.012415	28.97		-0.3233	NON-ANTIGEN
DRB1_0101	YYPDKVFRS	0.813	0.010276	31.67		-0.3237	NON-ANTIGEN
DRB1_0101	ISSVLNDIL	0.92	0.006021	39.99		-0.3334	NON-ANTIGEN
DRB1_0101	VFRSSVLHS	0.46	0.009393	32.98		-0.3392	NON-ANTIGEN
DRB1_0101	FTGCVIAWN	0.627	0.001519	67.97		-0.3448	NON-ANTIGEN
DRB1_0101	VNIQKEIDR	0.44	0.003724	48.88		-0.3611	NON-ANTIGEN
DRB1_0101	IQKEIDRLN	0.54	0.005136	42.77		-0.4173	NON-ANTIGEN
DRB1_0101	FIKQYGDCL	0.867	0.005891	40.36		-0.4436	NON-ANTIGEN
DRB1_0101	LREFVFKNI	0.413	0.002007	61.87		-0.4605	NON-ANTIGEN
DRB1_0101	LNTLVKQLS	0.72	0.002156	60.19		-0.4635	NON-ANTIGEN
DRB1_0101	INLVRDLPQ	0.487	0.000906	78.78		-0.4749	NON-ANTIGEN
DRB1_0101	LCCMTSCCS	0.233	0.00016	95		-0.4779	NON-ANTIGEN
DRB1_0101	NQKLIANQF	0.44	0.005922	40.27		-0.4784	NON-ANTIGEN
DRB1_0101	IRGDEVRQI	0.6	0.016697	25.22		-0.5067	NON-ANTIGEN
DRB1_0101	AEVQIDRLI	0.427	0.003097	52.76		-0.5562	NON-ANTIGEN
DRB1_0101	NVYADSFVI	0.42	0.002611	56.21		-0.5617	NON-ANTIGEN
DRB1_0101	FTNVYADSF	0.56	0.001432	69.19		-0.5651	NON-ANTIGEN
DRB1_0101	IIRGWIFGT	0.42	0.0013	71.31		-0.5765	NON-ANTIGEN
DRB1_0101	YTNSFTRGV	0.74	0.002003	61.91		-0.6177	NON-ANTIGEN
DRB1_0101	ISNCVADYS	0.56	0.003888	48.02		-0.6338	NON-ANTIGEN
DRB1_0101	DKVFRSSVL	0.42	0.004007	47.44		-0.6396	NON-ANTIGEN
DRB1_0101	KRSFIEDLL	0.34	0.000474	89.45		-0.6422	NON-ANTIGEN
DRB1_0101	LDKYFKNHT	0.187	0.001335	70.7		-0.6449	NON-ANTIGEN
DRB1_0101	PAYTNSFTR	0.333	0.000382	92.08		-0.7122	NON-ANTIGEN
DRB1_0101	VDCTMYICG	0.353	0.000203	95		-0.7197	NON-ANTIGEN
DRB1_0101	FERDISTEI	0.987	0.047027	15.09		-0.7442	NON-ANTIGEN
DRB1_0101	LDSFKEELD	0.36	0.000419	91.01		-0.7608	NON-ANTIGEN
DRB1_0101	YNYLYRLFR	0.587	0.003427	50.62		-0.8692	NON-ANTIGEN
DRB1_0101	IKVCEFQFC	0.393	0.00037	92.43		-0.901	NON-ANTIGEN
DRB1_0101	CSCLKGCCS	0.367	3.3e-05	95		-0.9354	NON-ANTIGEN
DRB1_0101	SNIIRGWIF	0.673	0.000875	79.42		-1.0471	NON-ANTIGEN
DRB1_0101	IDRLITGRL	0.427	0.004765	44.19		-1.346	NON-ANTIGEN
DRB1_0101	FKEELDKYF	0.593	0.002279	59.08		-1.5561	NON-ANTIGEN

## Sheet: Tool-EpiTOP server
HTL epitopes predicted by EpiTOP server
Position	Peptide	pIC50 values for HLA-DR												Number of bound alleles	VaxiJen Score	Probable Antigen/ Non- Antigen
		DRB1*0101	DRB1*0301	DRB1*0401	DRB1*0404	DRB1*0405	DRB1*0701	DRB1*0802	DRB1*0901	DRB1*1101	DRB1*1201	DRB1*1302	DRB1*1501
385	TKLNDLCFT	0	0	0	0	0	0	0	0	0	0	0	0	0	2.9364	ANTIGEN
386	KLNDLCFTN	0	0	0	0	0	0	0	0	0	0	0	0	0	2.9016	ANTIGEN
384	PTKLNDLCF	0	0	0	0	0	0	0	0	0	0	0	0	0	2.5304	ANTIGEN
535	KNKCVNFNF	0	0	0	0	0	0	0	0	0	0	0	0	0	2.4991	ANTIGEN
581	TLEILDITP	0	0	0	0	0	0	0	0	0	0	0	0	0	2.2496	ANTIGEN
228	DLPIGINIT	0	0	0	0	0	0	0	0	0	0	0	0	0	2.1393	ANTIGEN
1034	LGQSKRVDF	8.943	5.559	7.532	5.727	7.652	8.541	7.063	7.411	7.161	5.202	7.378	7.08	9	2.059	ANTIGEN
534	VKNKCVNFN	6.465	6.298	7.646	6.564	7.843	6.717	7.338	7.06	7.424	6.515	6.848	5.207	10	2.053	ANTIGEN
387	LNDLCFTNV	9.902	5.038	6.977	5.197	7.217	8.106	6.698	7.889	6.655	4.692	6.598	6.416	9	2.0179	ANTIGEN
1162	PDVDLGDIS	0	0	0	0	0	0	0	0	0	0	0	0	0	2.0111	ANTIGEN
585	LDITPCSFG	8.326	5.579	7.579	5.776	7.758	7.719	7.042	7.488	7.189	5.523	7.107	6.226	8	1.982	ANTIGEN
416	GKIADYNYK	0	0	0	0	0	0	0	0	0	0	0	0	0	1.9241	ANTIGEN
580	QTLEILDIT	0	0	0	0	0	0	0	0	0	0	0	0	0	1.8904	ANTIGEN
15	CVNLTTRTQ	0	0	0	0	0	0	0	0	0	0	0	0	0	1.8792	ANTIGEN
1038	KRVDFCGKG	0	0	0	0	0	0	0	0	0	0	0	0	0	1.8649	ANTIGEN
536	NKCVNFNFN	0	0	0	0	0	0	0	0	0	0	0	0	0	1.8627	ANTIGEN
537	KCVNFNFNG	0	0	0	0	0	0	0	0	0	0	0	0	0	1.8502	ANTIGEN
409	QIAPGQTGK	0	0	0	0	0	0	0	0	0	0	0	0	0	1.8297	ANTIGEN
229	LPIGINITR	6.638	5.313	7.604	5.748	7.607	6.974	6.762	7.047	7.015	4.766	7.038	5.064	8	1.8215	ANTIGEN
538	CVNFNFNGL	0	0	0	0	0	0	0	0	0	0	0	0	0	1.7985	ANTIGEN
408	RQIAPGQTG	0	0	0	0	0	0	0	0	0	0	0	0	0	1.789	ANTIGEN
1035	GQSKRVDFC	0	0	0	0	0	0	0	0	0	0	0	0	0	1.779	ANTIGEN
904	YRFNGIGVT	7.477	6.316	7.248	6.602	7.543	7.132	7	6.32	7.025	6.509	7.195	6.845	12	1.7692	ANTIGEN
588	TPCSFGGVS	0	0	0	0	0	0	0	0	0	0	0	0	0	1.7674	ANTIGEN
178	DLEGKQGNF	0	0	0	0	0	0	0	0	0	0	0	0	0	1.7618	ANTIGEN
589	PCSFGGVSV	0	0	0	0	0	0	0	0	0	0	0	0	0	1.7448	ANTIGEN
11	VSSQCVNLT	7.038	5.657	6.916	5.793	7.072	6.613	6.573	6.257	6.688	5.543	6.612	5.978	7	1.741	ANTIGEN
754	LQYGSFCTQ	5.534	4.16	6.346	4.449	6.28	6.166	5.486	6.004	5.804	3.693	6.203	4.579	1	1.7361	ANTIGEN
643	FQTRAGCLI	8.169	4.828	7.001	4.869	7.086	7.818	6.797	6.234	6.78	4.481	6.607	5.867	7	1.7332	ANTIGEN
1037	SKRVDFCGK	0	0	0	0	0	0	0	0	0	0	0	0	0	1.7321	ANTIGEN
383	SPTKLNDLC	0	0	0	0	0	0	0	0	0	0	0	0	0	1.7238	ANTIGEN
14	QCVNLTTRT	0	0	0	0	0	0	0	0	0	0	0	0	0	1.7193	ANTIGEN
642	VFQTRAGCL	8.529	5.427	6.673	5.61	6.959	7.942	6.102	6.612	6.212	4.946	6.217	6.82	6	1.7094	ANTIGEN
586	DITPCSFGG	0	0	0	0	0	0	0	0	0	0	0	0	0	1.7063	ANTIGEN
725	EILPVSMTK	0	0	0	0	0	0	0	0	0	0	0	0	0	1.6842	ANTIGEN
177	MDLEGKQGN	4.767	4.452	5.833	4.732	6.038	4.891	5.503	5.279	5.63	4.742	5.472	3.895	0	1.6834	ANTIGEN
388	NDLCFTNVY	0	0	0	0	0	0	0	0	0	0	0	0	0	1.6828	ANTIGEN
417	KIADYNYKL	0	0	0	0	0	0	0	0	0	0	0	0	0	1.6639	ANTIGEN
1163	DVDLGDISG	0	0	0	0	0	0	0	0	0	0	0	0	0	1.6593	ANTIGEN
410	IAPGQTGKI	8.92	5.186	7.279	5.371	7.501	8.761	6.362	7.006	6.651	4.466	7.041	7.141	9	1.6527	ANTIGEN
905	RFNGIGVTQ	0	0	0	0	0	0	0	0	0	0	0	0	0	1.6467	ANTIGEN
579	PQTLEILDI	0	0	0	0	0	0	0	0	0	0	0	0	0	1.6404	ANTIGEN
582	LEILDITPC	8.622	4.785	6.907	5.127	7.147	7.759	6.594	8.096	6.551	5.106	6.345	5.066	8	1.639	ANTIGEN
380	YGVSPTKLN	6.202	5.958	7.014	6.274	7.255	6.336	6.489	6.637	6.694	6.115	6.575	5.462	7	1.6382	ANTIGEN
381	GVSPTKLND	0	0	0	0	0	0	0	0	0	0	0	0	0	1.6364	ANTIGEN
726	ILPVSMTKT	8.396	4.692	6.865	4.984	7.092	7.263	6.37	7.397	6.428	4.422	6.235	5.16	7	1.6225	ANTIGEN
329	FPNITNLCP	8.734	4.327	6.818	4.63	6.873	7.775	6.515	8.057	6.446	4.259	6.3	4.906	7	1.6218	ANTIGEN
330	PNITNLCPF	0	0	0	0	0	0	0	0	0	0	0	0	0	1.6189	ANTIGEN
612	YQDVNCTEV	9.132	5.765	6.613	5.922	6.84	7.792	6.135	7.253	6.193	5.274	6.118	7.107	6	1.6172	ANTIGEN
715	PTNFTISVT	0	0	0	0	0	0	0	0	0	0	0	0	0	1.6055	ANTIGEN
841	LGDIAARDL	9.672	4.801	6.688	4.857	6.937	7.936	6.321	7.661	6.373	4.265	6.243	6.186	7	1.6038	ANTIGEN
315	TSNFRVQPT	0	0	0	0	0	0	0	0	0	0	0	0	0	1.5972	ANTIGEN
731	MTKTSVDCT	6.63	5.042	6.34	5.201	6.431	6.36	5.765	6.049	5.96	4.684	5.99	5.54	4	1.5951	ANTIGEN
1161	SPDVDLGDI	0	0	0	0	0	0	0	0	0	0	0	0	0	1.573	ANTIGEN
724	TEILPVSMT	0	0	0	0	0	0	0	0	0	0	0	0	0	1.5697	ANTIGEN
732	TKTSVDCTM	0	0	0	0	0	0	0	0	0	0	0	0	0	1.5614	ANTIGEN
727	LPVSMTKTS	6.633	4.548	6.611	4.769	6.852	6.323	6.086	6.216	6.291	4.601	6.267	4.791	4	1.555	ANTIGEN
13	SQCVNLTTR	0	0	0	0	0	0	0	0	0	0	0	0	0	1.5476	ANTIGEN
412	PGQTGKIAD	0	0	0	0	0	0	0	0	0	0	0	0	0	1.5384	ANTIGEN
415	TGKIADYNY	0	0	0	0	0	0	0	0	0	0	0	0	0	1.5305	ANTIGEN
317	NFRVQPTES	0	0	0	0	0	0	0	0	0	0	0	0	0	1.5291	ANTIGEN
331	NITNLCPFG	0	0	0	0	0	0	0	0	0	0	0	0	0	1.5251	ANTIGEN
1159	HTSPDVDLG	0	0	0	0	0	0	0	0	0	0	0	0	0	1.5209	ANTIGEN
316	SNFRVQPTE	0	0	0	0	0	0	0	0	0	0	0	0	0	1.5138	ANTIGEN
1060	VVFLHVTYV	9.3	5.15	6.438	5.351	6.678	7.679	6.118	7.191	6.075	4.804	6.017	6.418	6	1.5122	ANTIGEN
377	FKCYGVSPT	8.442	4.924	7.322	5.163	7.531	7.388	7.28	7.25	7.184	5.084	7.226	5.339	8	1.5114	ANTIGEN
539	VNFNFNGLT	7.537	5.965	7.26	6.204	7.554	7.065	7.058	6.481	7.083	6.158	7.254	6.579	9	1.5069	ANTIGEN
376	TFKCYGVSP	0	0	0	0	0	0	0	0	0	0	0	0	0	1.4994	ANTIGEN
1212	WPWYIWLGF	9.253	4.776	7.059	4.904	7.147	8.004	7.104	7.497	6.945	4.701	6.999	6.108	8	1.4953	ANTIGEN
644	QTRAGCLIG	0	0	0	0	0	0	0	0	0	0	0	0	0	1.4934	ANTIGEN
18	LTTRTQLPP	8.232	5.981	7.928	6.214	8.071	7.946	7.782	7.572	7.708	6.161	7.063	5.842	8	1.4891	ANTIGEN
1160	TSPDVDLGD	0	0	0	0	0	0	0	0	0	0	0	0	0	1.484	ANTIGEN
389	DLCFTNVYA	0	0	0	0	0	0	0	0	0	0	0	0	0	1.4817	ANTIGEN
265	YYVGYLQPR	5.265	5.208	6.337	5.555	6.468	5.63	5.434	5.735	5.787	4.644	5.825	4.91	2	1.4692	ANTIGEN
1196	SLIDLQELG	0	0	0	0	0	0	0	0	0	0	0	0	0	1.4611	ANTIGEN
382	VSPTKLNDL	8.461	5.77	6.934	5.784	7.062	7.84	6.372	6.87	6.566	5.135	6.641	7.243	9	1.461	ANTIGEN
649	CLIGAEHVN	0	0	0	0	0	0	0	0	0	0	0	0	0	1.4545	ANTIGEN
176	LMDLEGKQG	8.116	4.103	6.143	4.33	6.413	6.56	5.803	6.828	5.821	4.157	5.574	4.552	4	1.4394	ANTIGEN
503	VGYQPYRVV	7.749	5.251	6.33	5.22	6.608	6.486	6.034	5.981	6.157	4.953	5.946	6.414	5	1.4383	ANTIGEN
1265	LKGVKLHYT	7.775	4.545	6.584	4.729	6.666	6.855	6.085	7.071	6.202	4.161	6.182	5.119	5	1.4321	ANTIGEN
540	NFNFNGLTG	0	0	0	0	0	0	0	0	0	0	0	0	0	1.4312	ANTIGEN
840	CLGDIAARD	0	0	0	0	0	0	0	0	0	0	0	0	0	1.4292	ANTIGEN
896	IPFAMQMAY	7.379	4.604	6.783	4.864	6.828	7.152	6.345	6.874	6.424	4.351	6.5	5.139	8	1.4278	ANTIGEN
379	CYGVSPTKL	0	0	0	0	0	0	0	0	0	0	0	0	0	1.4263	ANTIGEN
378	KCYGVSPTK	0	0	0	0	0	0	0	0	0	0	0	0	0	1.4199	ANTIGEN
1208	QYIKWPWYI	0	0	0	0	0	0	0	0	0	0	0	0	0	1.4177	ANTIGEN
646	RAGCLIGAE	0	0	0	0	0	0	0	0	0	0	0	0	0	1.4165	ANTIGEN
728	PVSMTKTSV	0	0	0	0	0	0	0	0	0	0	0	0	0	1.4129	ANTIGEN
1059	GVVFLHVTY	0	0	0	0	0	0	0	0	0	0	0	0	0	1.4104	ANTIGEN
511	VVLSFELLH	6.798	5.943	7.466	6.334	7.498	7.074	7	7.15	7.097	6.062	7.104	5.72	9	1.409	ANTIGEN
493	QSYGFQPTN	0	0	0	0	0	0	0	0	0	0	0	0	0	1.4068	ANTIGEN
1036	QSKRVDFCG	0	0	0	0	0	0	0	0	0	0	0	0	0	1.4034	ANTIGEN
413	GQTGKIADY	0	0	0	0	0	0	0	0	0	0	0	0	0	1.4019	ANTIGEN
414	QTGKIADYN	0	0	0	0	0	0	0	0	0	0	0	0	0	1.3878	ANTIGEN
587	ITPCSFGGV	8.352	4.489	6.574	4.66	6.79	7.546	6.244	6.347	6.323	4.387	7.225	6.653	8	1.3871	ANTIGEN
1127	DVVIGIVNN	0	0	0	0	0	0	0	0	0	0	0	0	0	1.386	ANTIGEN
227	VDLPIGINI	9.653	5.973	7.285	6.165	7.332	8.612	7.137	7.161	7.043	5.78	7.544	7.806	9	1.3808	ANTIGEN
825	KVTLADAGF	0	0	0	0	0	0	0	0	0	0	0	0	0	1.3717	ANTIGEN
226	LVDLPIGIN	7.822	4.832	7.086	5.335	7.377	7.278	6.765	7.966	6.701	5.094	6.472	4.253	8	1.3714	ANTIGEN
434	IAWNSNNLD	5.386	4.558	6.701	4.779	6.837	5.74	6.51	6.196	6.62	5.084	6.708	4.136	5	1.3597	ANTIGEN
502	GVGYQPYRV	0	0	0	0	0	0	0	0	0	0	0	0	0	1.3587	ANTIGEN
1063	LHVTYVPAQ	6.215	4.528	6.681	4.837	6.653	6.362	6.124	6.341	6.26	4.258	6.186	4.342	4	1.3531	ANTIGEN
717	NFTISVTTE	0	0	0	0	0	0	0	0	0	0	0	0	0	1.353	ANTIGEN
266	YVGYLQPRT	7.195	5.375	6.26	5.549	6.263	6.16	6.275	6.257	6.17	5.442	6.32	5.946	2	1.3483	ANTIGEN
16	VNLTTRTQL	8.669	5.598	6.795	5.702	7.029	7.733	6.261	6.856	6.391	5.063	6.308	7.037	8	1.3468	ANTIGEN
730	SMTKTSVDC	0	0	0	0	0	0	0	0	0	0	0	0	0	1.3465	ANTIGEN
231	IGINITRFQ	7.25	5.79	7.905	5.997	8.164	6.968	7.662	6.981	7.78	5.968	7.68	5.526	8	1.3386	ANTIGEN
419	ADYNYKLPD	0	0	0	0	0	0	0	0	0	0	0	0	0	1.3382	ANTIGEN
1062	FLHVTYVPA	8.721	4.526	7	4.827	7.137	7.614	6.546	7.746	6.558	4.317	6.379	5.195	8	1.3346	ANTIGEN
897	PFAMQMAYR	0	0	0	0	0	0	0	0	0	0	0	0	0	1.3315	ANTIGEN
1033	VLGQSKRVD	5.94	5.42	6.787	5.677	7.065	5.792	6.474	6.58	6.598	5.828	6.115	4.566	5	1.3303	ANTIGEN
533	LVKNKCVNF	8.823	5.79	7.703	5.931	7.855	8.533	7.51	7.115	7.509	5.705	7.703	7.109	9	1.3263	ANTIGEN
752	LLLQYGSFC	7.303	5.195	7.239	5.463	7.445	7.563	6.88	6.983	6.947	5.594	6.807	5.278	8	1.326	ANTIGEN
230	PIGINITRF	0	0	0	0	0	0	0	0	0	0	0	0	0	1.322	ANTIGEN
613	QDVNCTEVP	0	0	0	0	0	0	0	0	0	0	0	0	0	1.3209	ANTIGEN
179	LEGKQGNFK	6.925	5.993	8.025	6.25	8.221	6.986	7.703	7.011	7.789	5.856	7.235	4.932	8	1.3187	ANTIGEN
1164	VDLGDISGI	8.127	5.389	6.666	5.491	6.78	7.95	5.757	6.385	6.083	4.581	6.508	7.392	7	1.3158	ANTIGEN
1128	VVIGIVNNT	5.862	4.477	5.87	4.655	5.934	5.971	4.956	5.397	5.33	3.913	5.633	5.34	0	1.3063	ANTIGEN
716	TNFTISVTT	0	0	0	0	0	0	0	0	0	0	0	0	0	1.3019	ANTIGEN
903	AYRFNGIGV	0	0	0	0	0	0	0	0	0	0	0	0	0	1.2995	ANTIGEN
485	GFNCYFPLQ	0	0	0	0	0	0	0	0	0	0	0	0	0	1.2939	ANTIGEN
20	TRTQLPPAY	0	0	0	0	0	0	0	0	0	0	0	0	0	1.2923	ANTIGEN
755	QYGSFCTQL	0	0	0	0	0	0	0	0	0	0	0	0	0	1.2906	ANTIGEN
293	LDPLSETKC	7.769	3.934	6.023	4.243	6.263	6.826	5.742	7.312	5.699	4.255	5.494	4.267	3	1.2825	ANTIGEN
314	QTSNFRVQP	0	0	0	0	0	0	0	0	0	0	0	0	0	1.2783	ANTIGEN
12	SSQCVNLTT	0	0	0	0	0	0	0	0	0	0	0	0	0	1.2774	ANTIGEN
797	FGGFNFSQI	10.731	5.194	7.449	5.271	7.639	8.844	7.452	8.428	7.313	4.983	7.607	7.031	9	1.273	ANTIGEN
826	VTLADAGFI	7.769	4.305	5.555	4.473	5.822	6.979	5.071	5.59	5.149	3.894	5.419	6.072	2	1.2653	ANTIGEN
578	DPQTLEILD	0	0	0	0	0	0	0	0	0	0	0	0	0	1.2645	ANTIGEN
590	CSFGGVSVI	0	0	0	0	0	0	0	0	0	0	0	0	0	1.263	ANTIGEN
651	IGAEHVNNS	6.22	4.578	6.675	4.754	6.813	6.232	6.311	5.956	6.459	4.721	6.523	4.754	5	1.2611	ANTIGEN
19	TTRTQLPPA	0	0	0	0	0	0	0	0	0	0	0	0	0	1.254	ANTIGEN
267	VGYLQPRTF	8.678	4.732	5.904	4.773	6.161	7.139	5.63	7.077	5.66	4.327	5.5	5.982	3	1.2441	ANTIGEN
614	DVNCTEVPV	0	0	0	0	0	0	0	0	0	0	0	0	0	1.2391	ANTIGEN
1264	VLKGVKLHY	6.985	5.399	6.879	5.707	6.872	7.298	6.021	6.689	6.283	4.853	6.439	6.122	6	1.2378	ANTIGEN
1061	VFLHVTYVP	6.077	4.673	5.976	4.829	5.998	6.08	5.814	5.494	5.849	4.888	6.077	5.282	0	1.2346	ANTIGEN
1262	EPVLKGVKL	0	0	0	0	0	0	0	0	0	0	0	0	0	1.2301	ANTIGEN
723	TTEILPVSM	0	0	0	0	0	0	0	0	0	0	0	0	0	1.2262	ANTIGEN
292	ALDPLSETK	0	0	0	0	0	0	0	0	0	0	0	0	0	1.2241	ANTIGEN
21	RTQLPPAYT	0	0	0	0	0	0	0	0	0	0	0	0	0	1.2195	ANTIGEN
375	STFKCYGVS	0	0	0	0	0	0	0	0	0	0	0	0	0	1.2176	ANTIGEN
328	RFPNITNLC	0	0	0	0	0	0	0	0	0	0	0	0	0	1.2172	ANTIGEN
628	QLTPTWRVY	0	0	0	0	0	0	0	0	0	0	0	0	0	1.2119	ANTIGEN
906	FNGIGVTQN	7.373	4.008	6.648	4.476	6.881	6.737	6.268	7.556	6.247	4.16	5.936	3.382	5	1.2116	ANTIGEN
508	YRVVVLSFE	6.989	5.49	6.584	5.875	6.755	6.555	6.079	7.164	6.153	5.435	5.968	5.166	5	1.2096	ANTIGEN
966	LSSNFGAIS	7.608	5.866	7.953	6.163	8.11	7.696	7.698	7.014	7.738	6.202	7.865	5.998	8	1.2091	ANTIGEN
645	TRAGCLIGA	0	0	0	0	0	0	0	0	0	0	0	0	0	1.2081	ANTIGEN
541	FNFNGLTGT	7.738	5.152	7.544	5.382	7.787	7.216	7.31	6.623	7.356	5.291	7.438	5.646	8	1.2014	ANTIGEN
411	APGQTGKIA	0	0	0	0	0	0	0	0	0	0	0	0	0	1.2002	ANTIGEN
663	DIPIGAGIC	0	0	0	0	0	0	0	0	0	0	0	0	0	1.1965	ANTIGEN
895	QIPFAMQMA	0	0	0	0	0	0	0	0	0	0	0	0	0	1.1924	ANTIGEN
509	RVVVLSFEL	0	0	0	0	0	0	0	0	0	0	0	0	0	1.1918	ANTIGEN
584	ILDITPCSF	8.503	3.985	6.014	4.092	6.011	7.649	5.699	7.206	5.686	3.482	5.97	5.551	3	1.1835	ANTIGEN
733	KTSVDCTMY	0	0	0	0	0	0	0	0	0	0	0	0	0	1.1824	ANTIGEN
1263	PVLKGVKLH	0	0	0	0	0	0	0	0	0	0	0	0	0	1.1779	ANTIGEN
556	NKKFLPFQQ	0	0	0	0	0	0	0	0	0	0	0	0	0	1.1677	ANTIGEN
513	LSFELLHAP	6.244	4.364	6.318	4.48	6.417	6.434	5.973	5.885	6.114	4.43	6.243	4.936	3	1.1659	ANTIGEN
902	MAYRFNGIG	9.005	7.206	8.387	7.426	8.759	8.118	8.228	7.876	8.182	7.551	7.614	7.283	12	1.1627	ANTIGEN
669	GICASYQTQ	0	0	0	0	0	0	0	0	0	0	0	0	0	1.1459	ANTIGEN
1172	INASVVNIQ	6.301	4.747	6.942	4.988	7.046	6.462	6.417	6.37	6.626	4.617	6.803	4.782	8	1.1445	ANTIGEN
555	SNKKFLPFQ	0	0	0	0	0	0	0	0	0	0	0	0	0	1.1432	ANTIGEN
1126	CDVVIGIVN	0	0	0	0	0	0	0	0	0	0	0	0	0	1.1423	ANTIGEN
1207	EQYIKWPWY	0	0	0	0	0	0	0	0	0	0	0	0	0	1.1384	ANTIGEN
796	DFGGFNFSQ	0	0	0	0	0	0	0	0	0	0	0	0	0	1.1378	ANTIGEN
662	CDIPIGAGI	0	0	0	0	0	0	0	0	0	0	0	0	0	1.1345	ANTIGEN
1225	IAIVMVTIM	8.283	4.092	6.222	4.341	6.449	7.328	5.701	6.841	5.759	3.688	5.635	4.995	4	1.1339	ANTIGEN
1260	DSEPVLKGV	0	0	0	0	0	0	0	0	0	0	0	0	0	1.1314	ANTIGEN
968	SNFGAISSV	0	0	0	0	0	0	0	0	0	0	0	0	0	1.1296	ANTIGEN
629	LTPTWRVYS	8.183	5.676	7.794	6.014	7.939	7.705	7.273	7.793	7.357	5.652	7.09	5.808	8	1.1258	ANTIGEN
180	EGKQGNFKN	0	0	0	0	0	0	0	0	0	0	0	0	0	1.1232	ANTIGEN
406	EVRQIAPGQ	0	0	0	0	0	0	0	0	0	0	0	0	0	1.1205	ANTIGEN
494	SYGFQPTNG	0	0	0	0	0	0	0	0	0	0	0	0	0	1.1187	ANTIGEN
141	LGVYYHKNN	6.204	4.049	6.102	4.315	6.398	5.347	6.111	6.415	6.06	4.533	5.752	3.403	2	1.1158	ANTIGEN
327	VRFPNITNL	9.135	5.563	6.816	5.703	7.03	7.934	6.668	6.89	6.631	5.429	7.096	7.333	9	1.1141	ANTIGEN
1224	LIAIVMVTI	9.867	4.638	6.615	4.834	6.758	8.21	6.274	7.567	6.206	4.138	6.191	6.265	5	1.1121	ANTIGEN
766	ALTGIAVEQ	0	0	0	0	0	0	0	0	0	0	0	0	0	1.1091	ANTIGEN
809	PSKPSKRSF	0	0	0	0	0	0	0	0	0	0	0	0	0	1.1086	ANTIGEN
205	SKHTPINLV	0	0	0	0	0	0	0	0	0	0	0	0	0	1.1051	ANTIGEN
438	SNNLDSKVG	0	0	0	0	0	0	0	0	0	0	0	0	0	1.1048	ANTIGEN
808	DPSKPSKRS	0	0	0	0	0	0	0	0	0	0	0	0	0	1.1039	ANTIGEN
418	IADYNYKLP	7.575	4.239	6.24	4.366	6.536	6.459	6.245	6.783	6.194	4.556	6.03	4.688	4	1.1012	ANTIGEN
69	HVSGTNGTK	0	0	0	0	0	0	0	0	0	0	0	0	0	1.0956	ANTIGEN
510	VVVLSFELL	8.314	4.267	5.444	4.318	5.633	6.706	5.165	6.443	5.173	3.788	5.231	5.833	3	1.0909	ANTIGEN
568	DIADTTDAV	0	0	0	0	0	0	0	0	0	0	0	0	0	1.0904	ANTIGEN
1223	GLIAIVMVT	0	0	0	0	0	0	0	0	0	0	0	0	0	1.0885	ANTIGEN
729	VSMTKTSVD	6.002	5.217	6.725	5.614	6.903	6.409	6.154	6.742	6.301	5.424	6.052	4.533	5	1.0819	ANTIGEN
56	LPFFSNVTW	9.091	4.469	6.481	4.712	6.636	7.822	6.509	7.649	6.307	4.422	6.383	5.496	8	1.0808	ANTIGEN
512	VLSFELLHA	8.513	4.965	6.374	5.278	6.442	6.993	6.372	7.169	6.169	5.115	6.22	5.652	6	1.0776	ANTIGEN
1165	DLGDISGIN	0	0	0	0	0	0	0	0	0	0	0	0	0	1.0722	ANTIGEN
109	TLDSKTQSL	0	0	0	0	0	0	0	0	0	0	0	0	0	1.0685	ANTIGEN
654	EHVNNSYEC	0	0	0	0	0	0	0	0	0	0	0	0	0	1.068	ANTIGEN
894	LQIPFAMQM	8.153	4.536	6.559	4.726	6.602	7.297	6.44	6.607	6.383	4.488	6.845	5.854	8	1.068	ANTIGEN
486	FNCYFPLQS	7.857	4.527	6.986	4.83	7.073	6.836	7.014	7.156	6.855	4.898	6.75	4.667	8	1.0649	ANTIGEN
967	SSNFGAISS	0	0	0	0	0	0	0	0	0	0	0	0	0	1.0641	ANTIGEN
1125	NCDVVIGIV	0	0	0	0	0	0	0	0	0	0	0	0	0	1.0608	ANTIGEN
181	GKQGNFKNL	0	0	0	0	0	0	0	0	0	0	0	0	0	1.0607	ANTIGEN
545	GLTGTGVLT	0	0	0	0	0	0	0	0	0	0	0	0	0	1.0556	ANTIGEN
206	KHTPINLVR	0	0	0	0	0	0	0	0	0	0	0	0	0	1.0552	ANTIGEN
204	YSKHTPINL	8.774	6.494	7.29	6.607	7.365	7.958	7.17	6.706	7.127	6.342	7.401	8.089	12	1.0547	ANTIGEN
583	EILDITPCS	0	0	0	0	0	0	0	0	0	0	0	0	0	1.0536	ANTIGEN
225	PLVDLPIGI	0	0	0	0	0	0	0	0	0	0	0	0	0	1.0525	ANTIGEN
495	YGFQPTNGV	7.47	5.622	6.345	5.632	6.501	6.772	6.011	5.801	6.126	5.288	6.168	6.83	5	1.0509	ANTIGEN
213	VRDLPQGFS	8.078	5.037	6.475	5.417	6.767	6.998	6.183	7.434	6.119	5.196	5.985	5.25	5	1.0501	ANTIGEN
1211	KWPWYIWLG	0	0	0	0	0	0	0	0	0	0	0	0	0	1.0478	ANTIGEN
1174	ASVVNIQKE	0	0	0	0	0	0	0	0	0	0	0	0	0	1.0472	ANTIGEN
893	ALQIPFAMQ	0	0	0	0	0	0	0	0	0	0	0	0	0	1.0445	ANTIGEN
436	WNSNNLDSK	5.739	4.537	6.982	4.756	7.081	5.875	6.753	5.893	6.863	4.543	7.077	4.264	5	1.0425	ANTIGEN
899	AMQMAYRFN	0	0	0	0	0	0	0	0	0	0	0	0	0	1.042	ANTIGEN
1214	WYIWLGFIA	8.695	4.371	6.83	4.64	6.792	7.345	7.05	7.304	6.769	4.662	6.933	4.946	8	1.0356	ANTIGEN
1213	PWYIWLGFI	0	0	0	0	0	0	0	0	0	0	0	0	0	1.0343	ANTIGEN
507	PYRVVVLSF	0	0	0	0	0	0	0	0	0	0	0	0	0	1.0281	ANTIGEN
554	ESNKKFLPF	0	0	0	0	0	0	0	0	0	0	0	0	0	1.0278	ANTIGEN
898	FAMQMAYRF	8.88	5.573	7.825	5.619	7.867	8.561	7.516	7.482	7.588	5.215	7.572	6.694	9	1.0278	ANTIGEN
661	ECDIPIGAG	0	0	0	0	0	0	0	0	0	0	0	0	0	1.026	ANTIGEN
294	DPLSETKCT	0	0	0	0	0	0	0	0	0	0	0	0	0	1.0242	ANTIGEN
713	AIPTNFTIS	0	0	0	0	0	0	0	0	0	0	0	0	0	1.0242	ANTIGEN
693	IAYTMSLGA	8.324	5.419	7.588	5.701	7.645	7.916	7.053	7.433	7.136	5.19	6.955	5.918	8	1.0212	ANTIGEN
1091	REGVFVSNG	0	0	0	0	0	0	0	0	0	0	0	0	0	1.0165	ANTIGEN
722	VTTEILPVS	5.948	5.097	6.458	5.316	6.439	6.041	6.127	5.733	6.218	5.213	6.356	5.362	3	1.0163	ANTIGEN
598	ITPGTNTSN	5.483	3.997	6.321	4.384	6.491	5.981	5.457	6.195	5.767	3.866	5.771	3.807	2	1.0158	ANTIGEN
769	GIAVEQDKN	0	0	0	0	0	0	0	0	0	0	0	0	0	1.0158	ANTIGEN
295	PLSETKCTL	0	0	0	0	0	0	0	0	0	0	0	0	0	1.0147	ANTIGEN
92	FASTEKSNI	9.255	5.121	7.369	5.18	7.548	8.435	6.827	7.386	6.974	4.532	7.034	6.768	9	1.0137	ANTIGEN
113	KTQSLLIVN	0	0	0	0	0	0	0	0	0	0	0	0	0	1.0113	ANTIGEN
1068	VPAQEKNFT	6.494	5.089	6.312	5.189	6.468	5.891	6.006	5.8	6.121	4.976	6.045	5.504	3	1.0107	ANTIGEN
108	TTLDSKTQS	0	0	0	0	0	0	0	0	0	0	0	0	0	1.0106	ANTIGEN
278	KYNENGTIT	0	0	0	0	0	0	0	0	0	0	0	0	0	1.0105	ANTIGEN
297	SETKCTLKS	0	0	0	0	0	0	0	0	0	0	0	0	0	1.01	ANTIGEN
1193	LNESLIDLQ	5.967	4.575	6.675	4.802	6.742	6.213	6.159	6.133	6.368	4.433	6.636	4.697	4	1.0001	ANTIGEN
33	TRGVYYPDK	0	0	0	0	0	0	0	0	0	0	0	0	0	0.9996	ANTIGEN
390	LCFTNVYAD	5.92	4.6	6.804	4.956	6.818	6.3	6.245	6.745	6.396	4.712	6.128	3.902	4	0.9994	ANTIGEN
848	DLICAQKFN	0	0	0	0	0	0	0	0	0	0	0	0	0	0.9955	ANTIGEN
844	IAARDLICA	8.722	6.242	8.295	6.502	8.449	8.116	8.126	7.63	8.043	6.34	7.404	6.161	10	0.9915	ANTIGEN
217	PQGFSALEP	0	0	0	0	0	0	0	0	0	0	0	0	0	0.991	ANTIGEN
969	NFGAISSVL	0	0	0	0	0	0	0	0	0	0	0	0	0	0.9894	ANTIGEN
201	FKIYSKHTP	7.111	3.763	6.081	3.878	6.201	6.393	6.082	6.539	6.028	4.01	6.122	4.347	3	0.9886	ANTIGEN
70	VSGTNGTKR	5.927	5.027	6.559	5.466	6.794	5.999	5.965	5.988	6.095	4.738	5.737	4.161	2	0.9855	ANTIGEN
591	SFGGVSVIT	0	0	0	0	0	0	0	0	0	0	0	0	0	0.9792	ANTIGEN
245	HRSYLTPGD	0	0	0	0	0	0	0	0	0	0	0	0	0	0.9777	ANTIGEN
90	VYFASTEKS	5.913	4.209	5.598	4.447	5.763	5.587	5.112	5.588	5.263	4.219	5.339	4.525	0	0.9773	ANTIGEN
1194	NESLIDLQE	0	0	0	0	0	0	0	0	0	0	0	0	0	0.9767	ANTIGEN
10	LVSSQCVNL	9.313	5.791	7.744	5.939	7.864	8.759	7.27	7.385	7.369	5.36	7.61	7.432	9	0.9764	ANTIGEN
1130	IGIVNNTVY	7.862	4.294	6.451	4.571	6.678	7.132	5.985	7.283	6.043	3.996	5.837	4.675	5	0.9758	ANTIGEN
695	YTMSLGAEN	5.302	5.094	6.239	5.518	6.363	5.9	5.704	5.707	5.842	5.261	5.897	4.626	1	0.9735	ANTIGEN
1261	SEPVLKGVK	0	0	0	0	0	0	0	0	0	0	0	0	0	0.9704	ANTIGEN
174	PFLMDLEGK	0	0	0	0	0	0	0	0	0	0	0	0	0	0.9697	ANTIGEN
768	TGIAVEQDK	0	0	0	0	0	0	0	0	0	0	0	0	0	0.9677	ANTIGEN
140	FLGVYYHKN	5.674	3.092	5.618	3.377	5.7	5.319	5.159	6.417	5.275	3.041	5.115	2.71	1	0.9675	ANTIGEN
1209	YIKWPWYIW	6.228	3.09	3.881	3.169	3.929	4.764	4.169	4.967	3.939	3.14	4.136	4.198	0	0.9673	ANTIGEN
91	YFASTEKSN	4.872	4.62	5.645	4.905	5.886	4.9	5.152	5.378	5.357	4.777	5.237	4.194	0	0.9639	ANTIGEN
1022	ANLAATKMS	0	0	0	0	0	0	0	0	0	0	0	0	0	0.96	ANTIGEN
799	GFNFSQILP	0	0	0	0	0	0	0	0	0	0	0	0	0	0.9579	ANTIGEN
458	KSNLKPFER	0	0	0	0	0	0	0	0	0	0	0	0	0	0.949	ANTIGEN
720	ISVTTEILP	7.661	4.801	6.976	5.097	7.044	7.543	6.458	7.133	6.531	4.683	6.33	5.244	8	0.9471	ANTIGEN
107	GTTLDSKTQ	0	0	0	0	0	0	0	0	0	0	0	0	0	0.9425	ANTIGEN
139	PFLGVYYHK	0	0	0	0	0	0	0	0	0	0	0	0	0	0.9406	ANTIGEN
318	FRVQPTESI	9.043	5.321	7.507	5.324	7.718	8.286	7.169	7.04	7.271	4.934	7.29	6.754	9	0.9396	ANTIGEN
34	RGVYYPDKV	0	0	0	0	0	0	0	0	0	0	0	0	0	0.9384	ANTIGEN
1031	ECVLGQSKR	0	0	0	0	0	0	0	0	0	0	0	0	0	0.9377	ANTIGEN
652	GAEHVNNSY	0	0	0	0	0	0	0	0	0	0	0	0	0	0.9347	ANTIGEN
668	AGICASYQT	0	0	0	0	0	0	0	0	0	0	0	0	0	0.934	ANTIGEN
757	GSFCTQLNR	0	0	0	0	0	0	0	0	0	0	0	0	0	0.9306	ANTIGEN
65	FHAIHVSGT	8.498	4.247	6.729	4.538	6.906	7.308	6.35	7.468	6.345	4.031	6.299	4.752	7	0.9305	ANTIGEN
333	TNLCPFGEV	0	0	0	0	0	0	0	0	0	0	0	0	0	0.9288	ANTIGEN
670	ICASYQTQT	7.417	4.822	6.959	5.062	7.169	6.899	6.466	6.497	6.611	4.689	6.717	5.492	8	0.9262	ANTIGEN
650	LIGAEHVNN	6.138	4.181	6.406	4.608	6.532	6.043	5.983	6.529	6.036	4.351	5.918	3.793	3	0.9246	ANTIGEN
1210	IKWPWYIWL	7.675	3.312	5.355	3.456	5.403	6.367	5.276	5.526	5.182	3.139	5.663	5.2	2	0.9231	ANTIGEN
22	TQLPPAYTN	0	0	0	0	0	0	0	0	0	0	0	0	0	0.9228	ANTIGEN
655	HVNNSYECD	0	0	0	0	0	0	0	0	0	0	0	0	0	0.9211	ANTIGEN
1197	LIDLQELGK	7.418	4.438	6.663	4.868	6.725	6.378	6.405	7.213	6.315	4.239	6.044	3.979	7	0.9206	ANTIGEN
938	LSSTASALG	8.394	5.591	7.633	5.834	7.782	7.784	7.083	7.468	7.206	5.536	7.092	6.183	8	0.9155	ANTIGEN
610	VLYQDVNCT	6.68	5.299	6.558	5.435	6.714	6.255	6.216	5.9	6.331	5.186	6.255	5.62	4	0.9146	ANTIGEN
1222	AGLIAIVMV	0	0	0	0	0	0	0	0	0	0	0	0	0	0.9145	ANTIGEN
756	YGSFCTQLN	6.986	5.169	6.241	5.535	6.447	6.062	6.211	7.092	6.098	5.579	6.001	4.653	3	0.9142	ANTIGEN
1204	GKYEQYIKW	0	0	0	0	0	0	0	0	0	0	0	0	0	0.9141	ANTIGEN
460	NLKPFERDI	0	0	0	0	0	0	0	0	0	0	0	0	0	0.9116	ANTIGEN
443	SKVGGNYNY	0	0	0	0	0	0	0	0	0	0	0	0	0	0.9111	ANTIGEN
457	RKSNLKPFE	0	0	0	0	0	0	0	0	0	0	0	0	0	0.909	ANTIGEN
1032	CVLGQSKRV	0	0	0	0	0	0	0	0	0	0	0	0	0	0.9083	ANTIGEN
277	LKYNENGTI	8.354	4.942	6.773	5.026	7.068	7.636	6.572	6.158	6.597	4.826	6.924	6.703	8	0.9066	ANTIGEN
200	YFKIYSKHT	7.635	4.821	5.75	5.032	6.013	6.084	5.387	6.569	5.426	4.594	5.172	5.22	2	0.9056	ANTIGEN
203	IYSKHTPIN	6.509	5.587	7.765	5.902	7.805	6.899	7.484	7.137	7.513	5.777	7.01	4.551	8	0.9013	ANTIGEN
1071	QEKNFTTAP	0	0	0	0	0	0	0	0	0	0	0	0	0	0.8955	ANTIGEN
214	RDLPQGFSA	0	0	0	0	0	0	0	0	0	0	0	0	0	0.8947	ANTIGEN
696	TMSLGAENS	0	0	0	0	0	0	0	0	0	0	0	0	0	0.8932	ANTIGEN
1195	ESLIDLQEL	0	0	0	0	0	0	0	0	0	0	0	0	0	0.893	ANTIGEN
439	NNLDSKVGG	0	0	0	0	0	0	0	0	0	0	0	0	0	0.8904	ANTIGEN
908	GIGVTQNVL	0	0	0	0	0	0	0	0	0	0	0	0	0	0.8904	ANTIGEN
664	IPIGAGICA	7.693	5.071	7.365	5.421	7.368	7.963	6.454	6.878	6.707	4.637	6.884	5.888	8	0.8901	ANTIGEN
767	LTGIAVEQD	6.22	3.535	5.749	3.923	5.931	5.776	5.369	6.788	5.399	3.775	5.173	2.928	1	0.8891	ANTIGEN
1064	HVTYVPAQE	0	0	0	0	0	0	0	0	0	0	0	0	0	0.8826	ANTIGEN
714	IPTNFTISV	9.125	5.977	8.015	6.145	8.091	8.468	7.798	7.077	7.786	5.856	8.003	7.324	9	0.882	ANTIGEN
112	SKTQSLLIV	0	0	0	0	0	0	0	0	0	0	0	0	0	0.8805	ANTIGEN
550	GVLTESNKK	0	0	0	0	0	0	0	0	0	0	0	0	0	0.8797	ANTIGEN
704	SVAYSNNSI	0	0	0	0	0	0	0	0	0	0	0	0	0	0.8783	ANTIGEN
487	NCYFPLQSY	0	0	0	0	0	0	0	0	0	0	0	0	0	0.8743	ANTIGEN
1067	YVPAQEKNF	7.983	5.421	6.201	5.467	6.448	7.198	5.743	6.49	5.903	5.006	5.957	6.806	5	0.8731	ANTIGEN
697	MSLGAENSV	6.967	4.715	5.933	4.735	5.997	6.697	5.058	5.685	5.433	3.93	5.854	6.533	3	0.873	ANTIGEN
842	GDIAARDLI	0	0	0	0	0	0	0	0	0	0	0	0	0	0.8727	ANTIGEN
298	ETKCTLKSF	0	0	0	0	0	0	0	0	0	0	0	0	0	0.872	ANTIGEN
824	NKVTLADAG	0	0	0	0	0	0	0	0	0	0	0	0	0	0.8702	ANTIGEN
1206	YEQYIKWPW	7.077	4.861	5.691	4.955	5.583	6.375	5.722	6.035	5.607	4.698	5.746	5.826	2	0.869	ANTIGEN
941	TASALGKLQ	0	0	0	0	0	0	0	0	0	0	0	0	0	0.8689	ANTIGEN
407	VRQIAPGQT	7.98	4.574	5.966	4.901	6.25	6.637	5.627	6.888	5.585	4.446	5.503	5.15	3	0.8675	ANTIGEN
442	DSKVGGNYN	0	0	0	0	0	0	0	0	0	0	0	0	0	0.8657	ANTIGEN
659	SYECDIPIG	0	0	0	0	0	0	0	0	0	0	0	0	0	0.8651	ANTIGEN
137	NDPFLGVYY	0	0	0	0	0	0	0	0	0	0	0	0	0	0.8641	ANTIGEN
68	IHVSGTNGT	6.195	3.973	6.074	4.119	6.178	5.95	5.557	5.51	5.766	3.741	6.029	4.688	0	0.8621	ANTIGEN
2	FVFLVLLPL	9.217	3.908	6.29	4.11	6.352	7.696	6.006	7.103	5.916	3.441	5.899	5.35	4	0.8601	ANTIGEN
529	KSTNLVKNK	0	0	0	0	0	0	0	0	0	0	0	0	0	0.8596	ANTIGEN
440	NLDSKVGGN	0	0	0	0	0	0	0	0	0	0	0	0	0	0.8595	ANTIGEN
72	GTNGTKRFD	0	0	0	0	0	0	0	0	0	0	0	0	0	0.8558	ANTIGEN
705	VAYSNNSIA	6.31	4.523	5.829	4.694	5.984	6.017	5.357	5.575	5.518	4.426	5.762	5.442	1	0.8537	ANTIGEN
718	FTISVTTEI	9.656	5.63	7.936	5.741	8.146	9.008	7.416	7.531	7.56	5.187	7.823	7.376	9	0.8535	ANTIGEN
459	SNLKPFERD	0	0	0	0	0	0	0	0	0	0	0	0	0	0.8527	ANTIGEN
641	NVFQTRAGC	0	0	0	0	0	0	0	0	0	0	0	0	0	0.8515	ANTIGEN
965	QLSSNFGAI	0	0	0	0	0	0	0	0	0	0	0	0	0	0.8501	ANTIGEN
218	QGFSALEPL	0	0	0	0	0	0	0	0	0	0	0	0	0	0.8462	ANTIGEN
1158	NHTSPDVDL	0	0	0	0	0	0	0	0	0	0	0	0	0	0.8446	ANTIGEN
1023	NLAATKMSE	0	0	0	0	0	0	0	0	0	0	0	0	0	0.8443	ANTIGEN
721	SVTTEILPV	0	0	0	0	0	0	0	0	0	0	0	0	0	0.8441	ANTIGEN
653	AEHVNNSYE	0	0	0	0	0	0	0	0	0	0	0	0	0	0.8405	ANTIGEN
1058	HGVVFLHVT	0	0	0	0	0	0	0	0	0	0	0	0	0	0.8374	ANTIGEN
1173	NASVVNIQK	0	0	0	0	0	0	0	0	0	0	0	0	0	0.8372	ANTIGEN
615	VNCTEVPVA	6.71	4.911	6.269	5.117	6.241	6.57	5.711	6.069	5.848	4.608	5.876	5.529	2	0.8346	ANTIGEN
843	DIAARDLIC	0	0	0	0	0	0	0	0	0	0	0	0	0	0.8304	ANTIGEN
1110	YEPQIITTD	5.62	5.381	6.441	5.785	6.703	5.816	6.102	6.098	6.152	5.854	5.766	4.513	2	0.8297	ANTIGEN
943	SALGKLQDV	0	0	0	0	0	0	0	0	0	0	0	0	0	0.8291	ANTIGEN
706	AYSNNSIAI	0	0	0	0	0	0	0	0	0	0	0	0	0	0.8274	ANTIGEN
8	LPLVSSQCV	8.802	4.5	6.427	4.601	6.615	7.484	5.93	7.02	6.031	3.953	5.987	5.837	5	0.8267	ANTIGEN
142	GVYYHKNNK	0	0	0	0	0	0	0	0	0	0	0	0	0	0.8264	ANTIGEN
996	LITGRLQSL	8.255	4.987	6.943	5.06	7.074	7.985	6.04	6.697	6.393	4.177	6.707	6.799	8	0.8238	ANTIGEN
351	YAWNRKRIS	6.188	5.53	6.385	5.666	6.644	5.618	6.171	5.724	6.289	5.835	6.229	5.713	2	0.8209	ANTIGEN
753	LLQYGSFCT	7.831	4.81	6.848	5.042	6.807	6.775	6.86	6.736	6.718	4.876	6.756	5.254	8	0.8188	ANTIGEN
332	ITNLCPFGE	6.842	3.902	6.186	4.267	6.12	6.03	5.949	6.996	5.875	3.898	5.704	3.625	2	0.8187	ANTIGEN
846	ARDLICAQK	0	0	0	0	0	0	0	0	0	0	0	0	0	0.8157	ANTIGEN
59	FSNVTWFHA	8.215	4.318	6.764	4.534	6.685	7.189	6.343	7.511	6.371	3.989	6.313	5.118	8	0.8156	ANTIGEN
1017	EIRASANLA	0	0	0	0	0	0	0	0	0	0	0	0	0	0.8135	ANTIGEN
1065	VTYVPAQEK	6.001	4.208	5.685	4.551	5.873	5.318	5.182	6.004	5.283	3.861	5.004	3.722	0	0.8132	ANTIGEN
182	KQGNFKNLR	0	0	0	0	0	0	0	0	0	0	0	0	0	0.809	ANTIGEN
9	PLVSSQCVN	0	0	0	0	0	0	0	0	0	0	0	0	0	0.8032	ANTIGEN
110	LDSKTQSLL	7.922	4.81	6.585	4.849	6.832	7.177	6.311	6.121	6.349	4.47	6.016	5.807	6	0.8027	ANTIGEN
240	TLLALHRSY	0	0	0	0	0	0	0	0	0	0	0	0	0	0.8009	ANTIGEN
942	ASALGKLQD	0	0	0	0	0	0	0	0	0	0	0	0	0	0.8007	ANTIGEN
1259	DDSEPVLKG	0	0	0	0	0	0	0	0	0	0	0	0	0	0.798	ANTIGEN
798	GGFNFSQIL	0	0	0	0	0	0	0	0	0	0	0	0	0	0.7967	ANTIGEN
656	VNNSYECDI	7.945	5.402	6.59	5.425	6.564	7.652	6.118	6.258	6.271	4.855	6.874	7.45	6	0.7935	ANTIGEN
492	LQSYGFQPT	8.113	4.973	6.918	5.13	7.144	6.729	6.917	7.012	6.848	5.112	6.797	5.441	8	0.7917	ANTIGEN
1198	IDLQELGKY	7.903	5.44	7.563	5.747	7.876	7.869	7.223	7.19	7.253	5.452	7.094	5.608	8	0.7907	ANTIGEN
546	LTGTGVLTE	7.109	5.274	7.508	5.708	7.565	7.137	6.951	7.226	7.034	5.224	6.722	4.755	8	0.7881	ANTIGEN
287	DAVDCALDP	0	0	0	0	0	0	0	0	0	0	0	0	0	0.7833	ANTIGEN
313	YQTSNFRVQ	6.514	5.913	6.869	6.118	7.096	6.138	6.379	6.473	6.597	5.819	6.519	5.89	7	0.7821	ANTIGEN
441	LDSKVGGNY	8.283	6.117	8.129	6.44	8.483	8.429	7.795	7.512	7.796	6.126	7.278	5.803	9	0.7814	ANTIGEN
1157	KNHTSPDVD	0	0	0	0	0	0	0	0	0	0	0	0	0	0.7809	ANTIGEN
216	LPQGFSALE	6.756	5.292	7.541	5.678	7.625	7.324	6.652	7.185	6.956	5.043	7.077	5.272	8	0.7784	ANTIGEN
481	NGVEGFNCY	0	0	0	0	0	0	0	0	0	0	0	0	0	0.7783	ANTIGEN
482	GVEGFNCYF	0	0	0	0	0	0	0	0	0	0	0	0	0	0.7775	ANTIGEN
1129	VIGIVNNTV	8.143	4.283	5.467	4.315	5.593	6.527	5.144	6.484	5.187	3.781	5.293	5.806	3	0.7774	ANTIGEN
244	LHRSYLTPG	7.828	5.14	7.197	5.387	7.407	7.212	6.682	6.756	6.827	5.23	6.947	5.954	8	0.7761	ANTIGEN
172	SQPFLMDLE	0	0	0	0	0	0	0	0	0	0	0	0	0	0.7749	ANTIGEN
892	AALQIPFAM	0	0	0	0	0	0	0	0	0	0	0	0	0	0.7747	ANTIGEN
1124	GNCDVVIGI	0	0	0	0	0	0	0	0	0	0	0	0	0	0.7742	ANTIGEN
680	SPRRARSVA	0	0	0	0	0	0	0	0	0	0	0	0	0	0.7729	ANTIGEN
199	GYFKIYSKH	0	0	0	0	0	0	0	0	0	0	0	0	0	0.7721	ANTIGEN
937	SLSSTASAL	0	0	0	0	0	0	0	0	0	0	0	0	0	0.7716	ANTIGEN
219	GFSALEPLV	0	0	0	0	0	0	0	0	0	0	0	0	0	0.7669	ANTIGEN
455	LFRKSNLKP	8.196	5.935	7.89	6.158	8.015	7.969	7.656	7.631	7.63	6.032	7.061	5.934	8	0.766	ANTIGEN
279	YNENGTITD	5.594	5.612	6.733	6.051	6.809	6.013	6.515	5.991	6.504	6.199	6.45	4.983	5	0.765	ANTIGEN
349	SVYAWNRKR	0	0	0	0	0	0	0	0	0	0	0	0	0	0.765	ANTIGEN
504	GYQPYRVVV	0	0	0	0	0	0	0	0	0	0	0	0	0	0.7634	ANTIGEN
795	KDFGGFNFS	0	0	0	0	0	0	0	0	0	0	0	0	0	0.7614	ANTIGEN
626	ADQLTPTWR	0	0	0	0	0	0	0	0	0	0	0	0	0	0.7602	ANTIGEN
7	LLPLVSSQC	7.393	3.73	5.821	4.023	6.005	6.699	5.524	7.036	5.498	4.018	5.415	4.098	3	0.7587	ANTIGEN
249	LTPGDSSSG	6.541	4.091	6.188	4.32	6.302	6.463	5.293	5.861	5.62	3.816	5.903	5.131	3	0.7579	ANTIGEN
1070	AQEKNFTTA	0	0	0	0	0	0	0	0	0	0	0	0	0	0.7576	ANTIGEN
1111	EPQIITTDN	0	0	0	0	0	0	0	0	0	0	0	0	0	0.7562	ANTIGEN
399	SFVIRGDEV	0	0	0	0	0	0	0	0	0	0	0	0	0	0.7549	ANTIGEN
1226	AIVMVTIML	0	0	0	0	0	0	0	0	0	0	0	0	0	0.7545	ANTIGEN
1019	RASANLAAT	0	0	0	0	0	0	0	0	0	0	0	0	0	0.7524	ANTIGEN
611	LYQDVNCTE	4.915	4.079	6.179	4.327	6.159	5.399	5.983	5.302	6.068	4.392	6.642	4.265	1	0.7507	ANTIGEN
1101	HWFVTQRNF	0	0	0	0	0	0	0	0	0	0	0	0	0	0.746	ANTIGEN
202	KIYSKHTPI	0	0	0	0	0	0	0	0	0	0	0	0	0	0.7455	ANTIGEN
627	DQLTPTWRV	0	0	0	0	0	0	0	0	0	0	0	0	0	0.7445	ANTIGEN
631	PTWRVYSTG	0	0	0	0	0	0	0	0	0	0	0	0	0	0.7436	ANTIGEN
445	VGGNYNYLY	6.321	5.267	6.534	5.387	6.557	6.285	6.361	5.895	6.427	5.25	6.602	5.775	6	0.7432	ANTIGEN
352	AWNRKRISN	0	0	0	0	0	0	0	0	0	0	0	0	0	0.7421	ANTIGEN
1250	CGSCCKFDE	0	0	0	0	0	0	0	0	0	0	0	0	0	0.7415	ANTIGEN
694	AYTMSLGAE	0	0	0	0	0	0	0	0	0	0	0	0	0	0.7404	ANTIGEN
1045	KGYHLMSFP	0	0	0	0	0	0	0	0	0	0	0	0	0	0.7387	ANTIGEN
506	QPYRVVVLS	0	0	0	0	0	0	0	0	0	0	0	0	0	0.7379	ANTIGEN
1102	WFVTQRNFY	6.489	3.827	6.187	3.959	6.315	6.332	5.656	6.298	5.851	3.453	5.776	4.253	3	0.7376	ANTIGEN
667	GAGICASYQ	0	0	0	0	0	0	0	0	0	0	0	0	0	0.737	ANTIGEN
758	SFCTQLNRA	0	0	0	0	0	0	0	0	0	0	0	0	0	0.7333	ANTIGEN
734	TSVDCTMYI	0	0	0	0	0	0	0	0	0	0	0	0	0	0.7328	ANTIGEN
247	SYLTPGDSS	0	0	0	0	0	0	0	0	0	0	0	0	0	0.7324	ANTIGEN
264	AYYVGYLQP	0	0	0	0	0	0	0	0	0	0	0	0	0	0.7285	ANTIGEN
1090	PREGVFVSN	0	0	0	0	0	0	0	0	0	0	0	0	0	0.728	ANTIGEN
760	CTQLNRALT	0	0	0	0	0	0	0	0	0	0	0	0	0	0.7278	ANTIGEN
1215	YIWLGFIAG	8.572	5.511	6.511	5.826	6.584	6.943	6.254	7.349	6.154	5.571	6.008	6.203	5	0.7254	ANTIGEN
1176	VVNIQKEID	6.568	4.552	6.037	4.904	6.219	5.946	5.693	7.223	5.723	4.792	5.497	4.039	2	0.7227	ANTIGEN
405	DEVRQIAPG	0	0	0	0	0	0	0	0	0	0	0	0	0	0.7216	ANTIGEN
433	VIAWNSNNL	8.706	4.672	5.8	4.683	5.962	6.898	6.026	6.538	5.84	4.632	6.163	6.237	3	0.7216	ANTIGEN
1066	TYVPAQEKN	0	0	0	0	0	0	0	0	0	0	0	0	0	0.7158	ANTIGEN
1249	SCGSCCKFD	0	0	0	0	0	0	0	0	0	0	0	0	0	0.7155	ANTIGEN
61	NVTWFHAIH	0	0	0	0	0	0	0	0	0	0	0	0	0	0.7131	ANTIGEN
435	AWNSNNLDS	0	0	0	0	0	0	0	0	0	0	0	0	0	0.7122	ANTIGEN
839	DCLGDIAAR	0	0	0	0	0	0	0	0	0	0	0	0	0	0.7119	ANTIGEN
89	GVYFASTEK	0	0	0	0	0	0	0	0	0	0	0	0	0	0.7112	ANTIGEN
1074	NFTTAPAIC	0	0	0	0	0	0	0	0	0	0	0	0	0	0.7105	ANTIGEN
577	RDPQTLEIL	0	0	0	0	0	0	0	0	0	0	0	0	0	0.7101	ANTIGEN
1016	AEIRASANL	0	0	0	0	0	0	0	0	0	0	0	0	0	0.7082	ANTIGEN
947	KLQDVVNQN	0	0	0	0	0	0	0	0	0	0	0	0	0	0.7076	ANTIGEN
289	VDCALDPLS	6.63	5.064	6.447	5.278	6.401	6.394	6.035	6.528	6.14	5.011	6.352	5.568	6	0.707	ANTIGEN
1175	SVVNIQKEI	0	0	0	0	0	0	0	0	0	0	0	0	0	0.7057	ANTIGEN
712	IAIPTNFTI	8.843	4.601	6.597	4.653	6.506	7.606	6.53	6.719	6.462	4.318	7.068	6.694	9	0.7052	ANTIGEN
138	DPFLGVYYH	0	0	0	0	0	0	0	0	0	0	0	0	0	0.7042	ANTIGEN
907	NGIGVTQNV	0	0	0	0	0	0	0	0	0	0	0	0	0	0.7038	ANTIGEN
1021	SANLAATKM	0	0	0	0	0	0	0	0	0	0	0	0	0	0.703	ANTIGEN
576	VRDPQTLEI	9.254	5.587	6.866	5.738	6.902	8.055	6.742	6.854	6.657	5.379	7.165	7.508	9	0.7025	ANTIGEN
1020	ASANLAATK	0	0	0	0	0	0	0	0	0	0	0	0	0	0.7014	ANTIGEN
648	GCLIGAEHV	0	0	0	0	0	0	0	0	0	0	0	0	0	0.7002	ANTIGEN
1092	EGVFVSNGT	0	0	0	0	0	0	0	0	0	0	0	0	0	0.6988	ANTIGEN
548	GTGVLTESN	0	0	0	0	0	0	0	0	0	0	0	0	0	0.6986	ANTIGEN
692	IIAYTMSLG	8.575	5.163	7.223	5.362	7.432	7.26	7.206	7.338	7.111	5.547	7.166	5.822	8	0.6986	ANTIGEN
601	GTNTSNQVA	0	0	0	0	0	0	0	0	0	0	0	0	0	0.6957	ANTIGEN
822	LFNKVTLAD	6.969	5.852	8.008	6.276	8.133	7.226	7.728	7.486	7.702	6.269	6.978	4.617	8	0.6944	ANTIGEN
17	NLTTRTQLP	0	0	0	0	0	0	0	0	0	0	0	0	0	0.6921	ANTIGEN
810	SKPSKRSFI	0	0	0	0	0	0	0	0	0	0	0	0	0	0.691	ANTIGEN
823	FNKVTLADA	8.642	4.614	7.088	4.896	7.229	7.774	6.589	7.716	6.641	4.381	6.554	5.258	8	0.69	ANTIGEN
296	LSETKCTLK	7.469	5.688	7.836	6.051	8.071	7.243	7.298	7.483	7.428	5.421	7.091	5.126	8	0.6883	ANTIGEN
1171	GINASVVNI	0	0	0	0	0	0	0	0	0	0	0	0	0	0.6867	ANTIGEN
876	ALLAGTITS	0	0	0	0	0	0	0	0	0	0	0	0	0	0.6861	ANTIGEN
66	HAIHVSGTN	0	0	0	0	0	0	0	0	0	0	0	0	0	0.6831	ANTIGEN
526	GPKKSTNLV	0	0	0	0	0	0	0	0	0	0	0	0	0	0.6828	ANTIGEN
1192	NLNESLIDL	0	0	0	0	0	0	0	0	0	0	0	0	0	0.6827	ANTIGEN
549	TGVLTESNK	0	0	0	0	0	0	0	0	0	0	0	0	0	0.6803	ANTIGEN
901	QMAYRFNGI	0	0	0	0	0	0	0	0	0	0	0	0	0	0.6803	ANTIGEN
820	DLLFNKVTL	0	0	0	0	0	0	0	0	0	0	0	0	0	0.68	ANTIGEN
1093	GVFVSNGTH	0	0	0	0	0	0	0	0	0	0	0	0	0	0.679	ANTIGEN
567	RDIADTTDA	0	0	0	0	0	0	0	0	0	0	0	0	0	0.6774	ANTIGEN
23	QLPPAYTNS	0	0	0	0	0	0	0	0	0	0	0	0	0	0.6729	ANTIGEN
122	NATNVVIKV	0	0	0	0	0	0	0	0	0	0	0	0	0	0.6726	ANTIGEN
67	AIHVSGTNG	0	0	0	0	0	0	0	0	0	0	0	0	0	0.6721	ANTIGEN
909	IGVTQNVLY	7.638	4.891	7.055	5.188	7.2	7.424	6.542	7.11	6.626	4.608	6.393	5.185	8	0.6715	ANTIGEN
232	GINITRFQT	0	0	0	0	0	0	0	0	0	0	0	0	0	0.6699	ANTIGEN
566	GRDIADTTD	0	0	0	0	0	0	0	0	0	0	0	0	0	0.668	ANTIGEN
858	LTVLPPLLT	8.679	4.754	6.852	5.057	6.914	7.239	6.603	7.603	6.513	4.576	6.359	5.262	8	0.6677	ANTIGEN
543	FNGLTGTGV	9.947	4.75	7.131	4.965	7.371	8.469	6.795	7.794	6.753	4.404	6.695	5.944	8	0.6673	ANTIGEN
167	TFEYVSQPF	0	0	0	0	0	0	0	0	0	0	0	0	0	0.6641	ANTIGEN
57	PFFSNVTWF	0	0	0	0	0	0	0	0	0	0	0	0	0	0.6638	ANTIGEN
665	PIGAGICAS	0	0	0	0	0	0	0	0	0	0	0	0	0	0.6621	ANTIGEN
857	GLTVLPPLL	0	0	0	0	0	0	0	0	0	0	0	0	0	0.6621	ANTIGEN
50	STQDLFLPF	0	0	0	0	0	0	0	0	0	0	0	0	0	0.6619	ANTIGEN
261	GAAAYYVGY	0	0	0	0	0	0	0	0	0	0	0	0	0	0.6604	ANTIGEN
288	AVDCALDPL	0	0	0	0	0	0	0	0	0	0	0	0	0	0.6604	ANTIGEN
933	KIQDSLSST	0	0	0	0	0	0	0	0	0	0	0	0	0	0.6586	ANTIGEN
751	NLLLQYGSF	0	0	0	0	0	0	0	0	0	0	0	0	0	0.6553	ANTIGEN
542	NFNGLTGTG	0	0	0	0	0	0	0	0	0	0	0	0	0	0.6541	ANTIGEN
647	AGCLIGAEH	0	0	0	0	0	0	0	0	0	0	0	0	0	0.6535	ANTIGEN
5	LVLLPLVSS	8.084	4.371	6.549	4.774	6.699	6.954	6.256	7.372	6.166	4.467	5.943	4.492	5	0.6523	ANTIGEN
1112	PQIITTDNT	0	0	0	0	0	0	0	0	0	0	0	0	0	0.6522	ANTIGEN
151	SWMESEFRV	0	0	0	0	0	0	0	0	0	0	0	0	0	0.651	ANTIGEN
703	NSVAYSNNS	0	0	0	0	0	0	0	0	0	0	0	0	0	0.6499	ANTIGEN
671	CASYQTQTN	0	0	0	0	0	0	0	0	0	0	0	0	0	0.6466	ANTIGEN
698	SLGAENSVA	0	0	0	0	0	0	0	0	0	0	0	0	0	0.6459	ANTIGEN
875	SALLAGTIT	0	0	0	0	0	0	0	0	0	0	0	0	0	0.6456	ANTIGEN
845	AARDLICAQ	0	0	0	0	0	0	0	0	0	0	0	0	0	0.6436	ANTIGEN
6	VLLPLVSSQ	5.692	3.952	5.419	4.288	5.577	5.235	5.265	5.307	5.245	4.176	5.61	4.116	0	0.6424	ANTIGEN
496	GFQPTNGVG	0	0	0	0	0	0	0	0	0	0	0	0	0	0.6424	ANTIGEN
547	TGTGVLTES	0	0	0	0	0	0	0	0	0	0	0	0	0	0.6422	ANTIGEN
259	TAGAAAYYV	0	0	0	0	0	0	0	0	0	0	0	0	0	0.6397	ANTIGEN
997	ITGRLQSLQ	8.051	6.53	8.59	6.785	8.854	7.758	8.422	7.928	8.412	6.666	7.779	5.755	11	0.6388	ANTIGEN
660	YECDIPIGA	6.929	5.798	6.736	6.027	6.785	6.634	6.542	5.875	6.56	5.998	6.941	6.745	8	0.6385	ANTIGEN
888	FGAGAALQI	9.472	5.554	7.963	5.713	7.956	9.218	7.085	7.624	7.348	4.726	7.672	7.487	9	0.6377	ANTIGEN
666	IGAGICASY	7.128	4.86	7.075	5.124	7.158	7.63	6.206	6.9	6.51	4.334	6.733	5.595	7	0.6368	ANTIGEN
609	AVLYQDVNC	0	0	0	0	0	0	0	0	0	0	0	0	0	0.6344	ANTIGEN
944	ALGKLQDVV	0	0	0	0	0	0	0	0	0	0	0	0	0	0.6335	ANTIGEN
683	RARSVASQS	0	0	0	0	0	0	0	0	0	0	0	0	0	0.6325	ANTIGEN
168	FEYVSQPFL	7.901	3.285	5.603	3.366	5.567	6.89	5.141	6.276	5.206	2.599	5.381	4.925	2	0.6324	ANTIGEN
558	KFLPFQQFG	0	0	0	0	0	0	0	0	0	0	0	0	0	0.6324	ANTIGEN
501	NGVGYQPYR	0	0	0	0	0	0	0	0	0	0	0	0	0	0.632	ANTIGEN
258	WTAGAAAYY	6.914	4.338	6.875	4.626	6.959	7.438	5.981	6.637	6.285	3.811	6.508	5.037	6	0.6306	ANTIGEN
1104	VTQRNFYEP	7.391	6.095	7.276	6.207	7.377	7.11	7.134	6.97	7.128	6.2	6.565	6.052	8	0.6288	ANTIGEN
456	FRKSNLKPF	8.137	4.534	6.817	4.59	7.058	7.679	6.298	6.635	6.503	4.14	6.638	5.93	7	0.628	ANTIGEN
44	RSSVLHSTQ	0	0	0	0	0	0	0	0	0	0	0	0	0	0.6268	ANTIGEN
632	TWRVYSTGS	0	0	0	0	0	0	0	0	0	0	0	0	0	0.6258	ANTIGEN
32	FTRGVYYPD	5.526	4.098	6.712	4.414	6.662	6.195	5.868	6.671	6.199	3.991	6.296	3.959	3	0.6229	ANTIGEN
939	SSTASALGK	0	0	0	0	0	0	0	0	0	0	0	0	0	0.6215	ANTIGEN
106	FGTTLDSKT	8.006	5.04	7.424	5.235	7.602	7.462	6.903	7.313	7.05	4.761	6.954	5.553	8	0.6164	ANTIGEN
821	LLFNKVTLA	7.57	5.246	7.251	5.474	7.494	7.223	7.004	6.425	7.049	5.455	7.147	5.832	8	0.615	ANTIGEN
175	FLMDLEGKQ	6.448	4.566	7.066	4.906	7.334	6.544	6.833	6.127	6.888	4.892	7.238	4.726	7	0.6124	ANTIGEN
268	GYLQPRTFL	0	0	0	0	0	0	0	0	0	0	0	0	0	0.6082	ANTIGEN
544	NGLTGTGVL	0	0	0	0	0	0	0	0	0	0	0	0	0	0.6076	ANTIGEN
514	SFELLHAPA	0	0	0	0	0	0	0	0	0	0	0	0	0	0.6074	ANTIGEN
1044	GKGYHLMSF	0	0	0	0	0	0	0	0	0	0	0	0	0	0.6057	ANTIGEN
592	FGGVSVITP	8.982	4.962	7.514	5.33	7.575	8.506	7.017	8.269	7.017	4.82	6.842	5.411	8	0.6041	ANTIGEN
243	ALHRSYLTP	0	0	0	0	0	0	0	0	0	0	0	0	0	0.6036	ANTIGEN
1100	THWFVTQRN	0	0	0	0	0	0	0	0	0	0	0	0	0	0.6024	ANTIGEN
437	NSNNLDSKV	0	0	0	0	0	0	0	0	0	0	0	0	0	0.6019	ANTIGEN
914	NVLYENQKL	0	0	0	0	0	0	0	0	0	0	0	0	0	0.6017	ANTIGEN
638	TGSNVFQTR	0	0	0	0	0	0	0	0	0	0	0	0	0	0.6003	ANTIGEN
444	KVGGNYNYL	0	0	0	0	0	0	0	0	0	0	0	0	0	0.5994	ANTIGEN
319	RVQPTESIV	0	0	0	0	0	0	0	0	0	0	0	0	0	0.599	ANTIGEN
1015	AAEIRASAN	0	0	0	0	0	0	0	0	0	0	0	0	0	0.5986	ANTIGEN
505	YQPYRVVVL	8.566	5.336	6.172	5.525	6.347	7.239	6.142	6.221	5.984	5.232	6.037	6.657	4	0.5964	ANTIGEN
105	IFGTTLDSK	5.538	4.085	6.283	4.347	6.374	5.573	5.722	5.88	5.917	3.706	5.829	3.683	1	0.5958	ANTIGEN
58	FFSNVTWFH	6.207	4.963	7.488	5.242	7.358	6.661	7.287	6.637	7.329	5.222	7.446	4.632	7	0.5951	ANTIGEN
420	DYNYKLPDD	0	0	0	0	0	0	0	0	0	0	0	0	0	0.5946	ANTIGEN
986	KVEAEVQID	0	0	0	0	0	0	0	0	0	0	0	0	0	0.5928	ANTIGEN
165	NCTFEYVSQ	0	0	0	0	0	0	0	0	0	0	0	0	0	0.5914	ANTIGEN
111	DSKTQSLLI	0	0	0	0	0	0	0	0	0	0	0	0	0	0.5911	ANTIGEN
248	YLTPGDSSS	5.849	4.156	5.114	4.392	5.273	5.119	5.018	5.323	4.998	4.507	5.404	4.789	0	0.5905	ANTIGEN
828	LADAGFIKQ	6.931	4.637	6.835	5.025	6.885	6.554	6.406	6.741	6.448	4.546	6.402	4.631	8	0.5856	ANTIGEN
1138	YDPLQPELD	6.868	5.338	6.388	5.671	6.577	6.263	6.116	7.513	6.125	5.636	5.893	4.804	4	0.5835	ANTIGEN
800	FNFSQILPD	6.543	4.799	7.463	5.253	7.496	7.001	6.965	7.121	7.062	5.1	7.038	4.332	8	0.5831	ANTIGEN
291	CALDPLSET	0	0	0	0	0	0	0	0	0	0	0	0	0	0.5823	ANTIGEN
711	SIAIPTNFT	0	0	0	0	0	0	0	0	0	0	0	0	0	0.5808	ANTIGEN
1218	LGFIAGLIA	8.827	4.745	6.905	5.104	6.96	7.796	6.533	7.636	6.465	4.58	6.333	5.242	8	0.5797	ANTIGEN
348	ASVYAWNRK	0	0	0	0	0	0	0	0	0	0	0	0	0	0.5788	ANTIGEN
827	TLADAGFIK	0	0	0	0	0	0	0	0	0	0	0	0	0	0.5781	ANTIGEN
488	CYFPLQSYG	0	0	0	0	0	0	0	0	0	0	0	0	0	0.578	ANTIGEN
1166	LGDISGINA	9.093	4.97	7.14	5.346	7.206	8.062	6.767	7.869	6.688	4.819	6.55	5.46	8	0.5772	ANTIGEN
260	AGAAAYYVG	0	0	0	0	0	0	0	0	0	0	0	0	0	0.5762	ANTIGEN
93	ASTEKSNII	0	0	0	0	0	0	0	0	0	0	0	0	0	0.5761	ANTIGEN
765	RALTGIAVE	0	0	0	0	0	0	0	0	0	0	0	0	0	0.5744	ANTIGEN
871	AQYTSALLA	0	0	0	0	0	0	0	0	0	0	0	0	0	0.5732	ANTIGEN
985	DKVEAEVQI	0	0	0	0	0	0	0	0	0	0	0	0	0	0.5732	ANTIGEN
149	NKSWMESEF	0	0	0	0	0	0	0	0	0	0	0	0	0	0.5725	ANTIGEN
190	REFVFKNID	0	0	0	0	0	0	0	0	0	0	0	0	0	0.5685	ANTIGEN
928	NSAIGKIQD	0	0	0	0	0	0	0	0	0	0	0	0	0	0.5659	ANTIGEN
46	SVLHSTQDL	0	0	0	0	0	0	0	0	0	0	0	0	0	0.5654	ANTIGEN
1123	SGNCDVVIG	0	0	0	0	0	0	0	0	0	0	0	0	0	0.5637	ANTIGEN
215	DLPQGFSAL	0	0	0	0	0	0	0	0	0	0	0	0	0	0.5622	ANTIGEN
342	FNATRFASV	9.353	5.437	7.741	5.556	7.889	8.498	7.21	7.678	7.334	4.938	7.324	6.809	9	0.5609	ANTIGEN
616	NCTEVPVAI	0	0	0	0	0	0	0	0	0	0	0	0	0	0.5598	ANTIGEN
275	FLLKYNENG	7.8	5.2	7.43	5.288	7.682	6.944	7.173	6.956	7.246	5.343	6.763	5.403	8	0.5595	ANTIGEN
84	LPFNDGVYF	7.795	4.779	6.748	4.976	6.901	7.699	6.499	5.96	6.498	4.694	6.692	5.965	7	0.5593	ANTIGEN
284	TITDAVDCA	0	0	0	0	0	0	0	0	0	0	0	0	0	0.5555	ANTIGEN
1199	DLQELGKYE	0	0	0	0	0	0	0	0	0	0	0	0	0	0.5544	ANTIGEN
283	GTITDAVDC	0	0	0	0	0	0	0	0	0	0	0	0	0	0.5522	ANTIGEN
1089	FPREGVFVS	7.133	5.097	7.587	5.374	7.525	7.172	7.254	6.765	7.306	5.212	7.333	5.244	8	0.5509	ANTIGEN
682	RRARSVASQ	0	0	0	0	0	0	0	0	0	0	0	0	0	0.549	ANTIGEN
873	YTSALLAGT	6.687	4.939	5.924	5.209	6.054	6.084	5.452	5.768	5.545	4.751	5.661	5.587	1	0.5487	ANTIGEN
707	YSNNSIAIP	6.284	5.263	6.179	5.491	6.336	6.408	5.946	5.603	5.985	5.536	6.161	5.836	2	0.5477	ANTIGEN
484	EGFNCYFPL	0	0	0	0	0	0	0	0	0	0	0	0	0	0.5453	ANTIGEN
970	FGAISSVLN	8.439	5.037	7.701	5.534	7.844	7.813	7.357	8.621	7.289	5.18	6.976	4.434	8	0.5435	ANTIGEN
62	VTWFHAIHV	9.746	5.428	6.74	5.652	6.819	7.907	6.74	7.462	6.528	5.301	6.676	6.835	9	0.5426	ANTIGEN
1202	ELGKYEQYI	0	0	0	0	0	0	0	0	0	0	0	0	0	0.5415	ANTIGEN
515	FELLHAPAT	8.202	4.237	6.699	4.475	6.676	7.118	6.418	7.347	6.382	3.985	6.437	4.814	8	0.5409	ANTIGEN
551	VLTESNKKF	7.728	5.48	6.588	5.473	6.863	7.15	6.271	6.245	6.415	5.233	6.396	6.722	7	0.5392	ANTIGEN
1136	TVYDPLQPE	0	0	0	0	0	0	0	0	0	0	0	0	0	0.5391	ANTIGEN
311	GIYQTSNFR	0	0	0	0	0	0	0	0	0	0	0	0	0	0.538	ANTIGEN
63	TWFHAIHVS	0	0	0	0	0	0	0	0	0	0	0	0	0	0.5374	ANTIGEN
1013	IRAAEIRAS	7.255	4.666	6.814	4.879	7.046	6.611	6.325	6.824	6.497	4.676	6.379	4.872	8	0.5366	ANTIGEN
940	STASALGKL	0	0	0	0	0	0	0	0	0	0	0	0	0	0.5357	ANTIGEN
744	GDSTECSNL	0	0	0	0	0	0	0	0	0	0	0	0	0	0.5337	ANTIGEN
404	GDEVRQIAP	0	0	0	0	0	0	0	0	0	0	0	0	0	0.5325	ANTIGEN
764	NRALTGIAV	0	0	0	0	0	0	0	0	0	0	0	0	0	0.5302	ANTIGEN
1181	KEIDRLNEV	0	0	0	0	0	0	0	0	0	0	0	0	0	0.53	ANTIGEN
913	QNVLYENQK	0	0	0	0	0	0	0	0	0	0	0	0	0	0.5285	ANTIGEN
285	ITDAVDCAL	7.873	4.256	6.235	4.296	6.215	7.37	5.816	6.352	5.923	3.707	6.426	6.132	4	0.526	ANTIGEN
280	NENGTITDA	0	0	0	0	0	0	0	0	0	0	0	0	0	0.5257	ANTIGEN
935	QDSLSSTAS	0	0	0	0	0	0	0	0	0	0	0	0	0	0.5245	ANTIGEN
241	LLALHRSYL	8.688	3.857	5.758	3.96	5.942	7.097	5.484	6.773	5.458	3.409	5.542	5.449	3	0.5241	ANTIGEN
691	SIIAYTMSL	0	0	0	0	0	0	0	0	0	0	0	0	0	0.5234	ANTIGEN
936	DSLSSTASA	0	0	0	0	0	0	0	0	0	0	0	0	0	0.5231	ANTIGEN
672	ASYQTQTNS	0	0	0	0	0	0	0	0	0	0	0	0	0	0.5213	ANTIGEN
602	TNTSNQVAV	0	0	0	0	0	0	0	0	0	0	0	0	0	0.5203	ANTIGEN
929	SAIGKIQDS	0	0	0	0	0	0	0	0	0	0	0	0	0	0.5185	ANTIGEN
702	ENSVAYSNN	0	0	0	0	0	0	0	0	0	0	0	0	0	0.5181	ANTIGEN
263	AAYYVGYLQ	0	0	0	0	0	0	0	0	0	0	0	0	0	0.5177	ANTIGEN
286	TDAVDCALD	0	0	0	0	0	0	0	0	0	0	0	0	0	0.5173	ANTIGEN
952	VNQNAQALN	5.923	5.569	7.009	5.911	7.165	6.179	6.804	6.305	6.843	6.008	6.876	5.114	6	0.5164	ANTIGEN
759	FCTQLNRAL	9.022	5.345	7.483	5.296	7.762	7.913	7.188	7.19	7.312	4.978	7.118	6.601	9	0.5159	ANTIGEN
257	GWTAGAAAY	0	0	0	0	0	0	0	0	0	0	0	0	0	0.5157	ANTIGEN
608	VAVLYQDVN	6.07	4.274	5.721	4.571	5.818	5.567	5.441	6.681	5.464	4.37	5.395	3.872	1	0.513	ANTIGEN
489	YFPLQSYGF	8.732	5.386	6.228	5.488	6.248	7.631	5.95	7.219	5.928	4.916	5.97	6.694	4	0.5107	ANTIGEN
1257	DEDDSEPVL	0	0	0	0	0	0	0	0	0	0	0	0	0	0.5104	ANTIGEN
1042	FCGKGYHLM	7.641	4.855	7.024	4.859	7.182	7.07	6.774	6.639	6.854	4.591	6.504	5.453	8	0.5098	ANTIGEN
81	NPVLPFNDG	0	0	0	0	0	0	0	0	0	0	0	0	0	0.5086	ANTIGEN
887	TFGAGAALQ	0	0	0	0	0	0	0	0	0	0	0	0	0	0.5074	ANTIGEN
114	TQSLLIVNN	0	0	0	0	0	0	0	0	0	0	0	0	0	0.5071	ANTIGEN
353	WNRKRISNC	8.008	5.644	7.998	5.878	8.245	8.05	7.696	7.768	7.734	6.04	7.235	5.459	8	0.5059	ANTIGEN
1201	QELGKYEQY	0	0	0	0	0	0	0	0	0	0	0	0	0	0.5043	ANTIGEN
599	TPGTNTSNQ	0	0	0	0	0	0	0	0	0	0	0	0	0	0.5029	ANTIGEN
984	LDKVEAEVQ	7.316	4.626	6.756	4.924	6.932	6.733	6.252	7.265	6.362	4.395	6.178	4.456	6	0.5017	ANTIGEN
350	VYAWNRKRI	9.35	4.867	5.955	4.863	6.254	6.917	6.198	6.837	6.008	4.863	6.108	6.516	4	0.5003	ANTIGEN
473	YQAGSTPCN	4.557	4.653	5.827	5.021	5.735	5.515	4.94	5.481	5.257	4.394	5.493	4.524	0	0.4992	ANTIGEN
239	QTLLALHRS	0	0	0	0	0	0	0	0	0	0	0	0	0	0.499	ANTIGEN
603	NTSNQVAVL	0	0	0	0	0	0	0	0	0	0	0	0	0	0.4987	ANTIGEN
1072	EKNFTTAPA	0	0	0	0	0	0	0	0	0	0	0	0	0	0.4978	ANTIGEN
633	WRVYSTGSN	7.02	4.326	6.895	4.783	7.211	6.655	6.851	7.032	6.719	4.908	6.584	3.671	8	0.4976	ANTIGEN
1169	ISGINASVV	8.962	4.134	6.182	4.29	6.36	7.485	5.821	7.061	5.816	3.698	5.888	5.541	4	0.4934	ANTIGEN
886	WTFGAGAAL	8.465	4.789	7.208	4.959	7.292	8.538	6.283	6.788	6.587	4.002	6.96	6.519	8	0.4918	ANTIGEN
569	IADTTDAVR	6.759	5.155	7.401	5.515	7.549	6.67	6.886	7.081	7.01	4.833	6.744	4.53	8	0.4911	ANTIGEN
60	SNVTWFHAI	0	0	0	0	0	0	0	0	0	0	0	0	0	0.4892	ANTIGEN
527	PKKSTNLVK	0	0	0	0	0	0	0	0	0	0	0	0	0	0.4877	ANTIGEN
528	KKSTNLVKN	0	0	0	0	0	0	0	0	0	0	0	0	0	0.4876	ANTIGEN
746	STECSNLLL	0	0	0	0	0	0	0	0	0	0	0	0	0	0.4871	ANTIGEN
900	MQMAYRFNG	7.38	5.192	6.549	5.402	6.459	6.511	6.135	6.536	6.203	5.132	6.363	6.126	6	0.4868	ANTIGEN
148	NNKSWMESE	0	0	0	0	0	0	0	0	0	0	0	0	0	0.4865	ANTIGEN
872	QYTSALLAG	0	0	0	0	0	0	0	0	0	0	0	0	0	0.4865	ANTIGEN
890	AGAALQIPF	0	0	0	0	0	0	0	0	0	0	0	0	0	0.4855	ANTIGEN
1156	FKNHTSPDV	8.449	5.189	7.453	5.232	7.433	7.885	7.307	6.703	7.327	5.018	7.8	6.744	9	0.4846	ANTIGEN
237	RFQTLLALH	0	0	0	0	0	0	0	0	0	0	0	0	0	0.4834	ANTIGEN
681	PRRARSVAS	0	0	0	0	0	0	0	0	0	0	0	0	0	0.4829	ANTIGEN
421	YNYKLPDDF	8.062	6.522	7.156	6.478	7.316	7.761	6.899	6.89	6.986	6.177	6.754	7.452	11	0.4828	ANTIGEN
115	QSLLIVNNA	0	0	0	0	0	0	0	0	0	0	0	0	0	0.4826	ANTIGEN
770	IAVEQDKNT	6.837	4.628	6.625	4.73	6.901	6.103	6.312	5.956	6.456	4.597	6.324	5.055	6	0.4823	ANTIGEN
639	GSNVFQTRA	0	0	0	0	0	0	0	0	0	0	0	0	0	0.4813	ANTIGEN
559	FLPFQQFGR	7.167	4.006	6.608	4.397	6.548	6.077	6.639	7.105	6.452	3.967	6.448	3.551	7	0.4802	ANTIGEN
575	AVRDPQTLE	0	0	0	0	0	0	0	0	0	0	0	0	0	0.4802	ANTIGEN
719	TISVTTEIL	0	0	0	0	0	0	0	0	0	0	0	0	0	0.4795	ANTIGEN
640	SNVFQTRAG	0	0	0	0	0	0	0	0	0	0	0	0	0	0.4789	ANTIGEN
807	PDPSKPSKR	0	0	0	0	0	0	0	0	0	0	0	0	0	0.478	ANTIGEN
1205	KYEQYIKWP	0	0	0	0	0	0	0	0	0	0	0	0	0	0.4768	ANTIGEN
950	DVVNQNAQA	0	0	0	0	0	0	0	0	0	0	0	0	0	0.4763	ANTIGEN
1105	TQRNFYEPQ	0	0	0	0	0	0	0	0	0	0	0	0	0	0.4762	ANTIGEN
951	VVNQNAQAL	7.886	5.329	6.456	5.357	6.679	7.123	6.128	6.012	6.221	4.97	6.156	6.581	5	0.4749	ANTIGEN
1114	IITTDNTFV	8.014	4.301	6.288	4.415	6.523	7.037	5.762	6.268	5.892	3.835	5.791	5.611	3	0.4733	ANTIGEN
861	LPPLLTDEM	7.87	3.852	5.809	3.966	5.906	6.852	5.501	6.675	5.524	3.48	5.665	4.924	3	0.4723	ANTIGEN
1221	IAGLIAIVM	8.749	4.209	6.368	4.494	6.441	7.504	6.086	7.183	5.986	3.911	5.895	5.13	5	0.4716	ANTIGEN
135	FCNDPFLGV	8.353	5.018	7.338	5.134	7.376	7.665	7.137	6.413	7.165	4.914	7.656	6.723	9	0.4693	ANTIGEN
490	FPLQSYGFQ	7.928	5.69	8.146	6.031	8.459	7.67	7.845	7.716	7.875	5.833	7.643	5.411	8	0.4668	ANTIGEN
224	EPLVDLPIG	0	0	0	0	0	0	0	0	0	0	0	0	0	0.4666	ANTIGEN
153	MESEFRVYS	7.576	6.294	7.66	6.598	7.814	7.24	7.352	7.078	7.389	6.529	7.294	6.474	11	0.4652	ANTIGEN
3	VFLVLLPLV	7.087	3.666	4.945	3.787	4.91	6.034	4.462	5.474	4.527	3.049	4.684	5.154	1	0.4651	ANTIGEN
246	RSYLTPGDS	0	0	0	0	0	0	0	0	0	0	0	0	0	0.4645	ANTIGEN
83	VLPFNDGVY	7.403	4.02	5.387	4.334	5.684	6.251	5.398	6.456	5.222	4.179	5.31	4.541	2	0.4642	ANTIGEN
31	SFTRGVYYP	0	0	0	0	0	0	0	0	0	0	0	0	0	0.4639	ANTIGEN
310	KGIYQTSNF	0	0	0	0	0	0	0	0	0	0	0	0	0	0.4627	ANTIGEN
116	SLLIVNNAT	0	0	0	0	0	0	0	0	0	0	0	0	0	0.4612	ANTIGEN
262	AAAYYVGYL	0	0	0	0	0	0	0	0	0	0	0	0	0	0.4605	ANTIGEN
630	TPTWRVYST	0	0	0	0	0	0	0	0	0	0	0	0	0	0.4605	ANTIGEN
553	TESNKKFLP	0	0	0	0	0	0	0	0	0	0	0	0	0	0.4599	ANTIGEN
882	ITSGWTFGA	7.246	4.854	7.098	5.109	6.962	7.473	6.222	6.698	6.501	4.331	6.782	5.83	7	0.4577	ANTIGEN
701	AENSVAYSN	0	0	0	0	0	0	0	0	0	0	0	0	0	0.4563	ANTIGEN
1024	LAATKMSEC	6.996	4.54	6.6	4.796	6.778	7.04	6.047	6.899	6.193	4.707	6.068	4.876	5	0.4556	ANTIGEN
877	LLAGTITSG	7.323	4.699	6.827	4.977	6.997	7.077	5.916	6.474	6.226	4.457	6.385	5.652	6	0.4552	ANTIGEN
570	ADTTDAVRD	0	0	0	0	0	0	0	0	0	0	0	0	0	0.4548	ANTIGEN
144	YYHKNNKSW	7.621	6.124	6.808	6.16	7.141	7.145	6.546	6.629	6.628	5.892	6.014	6.451	8	0.4536	ANTIGEN
269	YLQPRTFLL	6.858	3.969	4.842	4.087	4.75	5.867	4.729	4.807	4.661	3.707	5.247	5.809	1	0.4532	ANTIGEN
1137	VYDPLQPEL	8.052	4.858	6.075	4.903	6.027	7.067	5.978	6.186	5.948	4.596	6.645	6.843	4	0.4525	ANTIGEN
1115	ITTDNTFVS	6.362	4.752	6.955	5.012	6.865	6.473	6.731	5.925	6.776	5.023	7.2	5.239	7	0.4511	ANTIGEN
143	VYYHKNNKS	4.949	3.915	5.176	4.034	5.312	4.619	5.043	4.673	5.121	4.222	5.354	4.319	0	0.451	ANTIGEN
945	LGKLQDVVN	7.754	4.79	7.019	5.245	7.169	6.992	6.77	7.985	6.681	4.99	6.362	4.236	8	0.4464	ANTIGEN
1018	IRASANLAA	7.632	4.952	7.103	5.191	7.135	7.251	6.651	6.775	6.748	4.836	6.892	5.802	8	0.4455	ANTIGEN
934	IQDSLSSTA	7.241	4.69	6.809	4.894	6.964	7.087	6.304	6.43	6.465	4.594	6.71	5.527	8	0.4433	ANTIGEN
953	NQNAQALNT	0	0	0	0	0	0	0	0	0	0	0	0	0	0.4432	ANTIGEN
55	FLPFFSNVT	7.847	3.687	6.069	3.852	6.209	6.353	6.056	6.787	5.965	3.719	6.136	4.324	3	0.44	ANTIGEN
854	KFNGLTVLP	0	0	0	0	0	0	0	0	0	0	0	0	0	0.439	ANTIGEN
891	GAALQIPFA	0	0	0	0	0	0	0	0	0	0	0	0	0	0.4388	ANTIGEN
604	TSNQVAVLY	0	0	0	0	0	0	0	0	0	0	0	0	0	0.4387	ANTIGEN
600	PGTNTSNQV	0	0	0	0	0	0	0	0	0	0	0	0	0	0.4377	ANTIGEN
915	VLYENQKLI	6.972	4.385	5.469	4.353	5.744	6.006	5.133	4.908	5.277	4.045	5.301	5.931	1	0.4361	ANTIGEN
778	TQEVFAQVK	0	0	0	0	0	0	0	0	0	0	0	0	0	0.4357	ANTIGEN
1041	DFCGKGYHL	0	0	0	0	0	0	0	0	0	0	0	0	0	0.4337	ANTIGEN
461	LKPFERDIS	7.216	3.793	5.811	3.973	5.913	5.914	5.822	6.807	5.732	4.043	5.948	4.278	2	0.4333	ANTIGEN
422	NYKLPDDFT	0	0	0	0	0	0	0	0	0	0	0	0	0	0.4315	ANTIGEN
605	SNQVAVLYQ	0	0	0	0	0	0	0	0	0	0	0	0	0	0.4311	ANTIGEN
781	VFAQVKQIY	6.453	4.996	6.254	5.154	6.476	6.164	5.945	5.956	6.038	4.899	5.823	5.19	2	0.4311	ANTIGEN
1167	GDISGINAS	0	0	0	0	0	0	0	0	0	0	0	0	0	0.4307	ANTIGEN
136	CNDPFLGVY	0	0	0	0	0	0	0	0	0	0	0	0	0	0.4295	ANTIGEN
874	TSALLAGTI	0	0	0	0	0	0	0	0	0	0	0	0	0	0.4292	ANTIGEN
150	KSWMESEFR	0	0	0	0	0	0	0	0	0	0	0	0	0	0.4287	ANTIGEN
829	ADAGFIKQY	0	0	0	0	0	0	0	0	0	0	0	0	0	0.4271	ANTIGEN
1237	MTSCCSCLK	5.23	4.492	6.008	4.813	5.936	5.517	5.683	5.359	5.79	4.431	6.708	4.932	1	0.427	ANTIGEN
4	FLVLLPLVS	8.345	4.342	6.872	4.691	6.934	7.171	6.623	7.774	6.533	4.394	6.333	4.543	8	0.4266	ANTIGEN
606	NQVAVLYQD	0	0	0	0	0	0	0	0	0	0	0	0	0	0.4266	ANTIGEN
45	SSVLHSTQD	0	0	0	0	0	0	0	0	0	0	0	0	0	0.4256	ANTIGEN
1113	QIITTDNTF	0	0	0	0	0	0	0	0	0	0	0	0	0	0.4253	ANTIGEN
1182	EIDRLNEVA	0	0	0	0	0	0	0	0	0	0	0	0	0	0.4209	ANTIGEN
191	EFVFKNIDG	0	0	0	0	0	0	0	0	0	0	0	0	0	0.4189	ANTIGEN
480	CNGVEGFNC	0	0	0	0	0	0	0	0	0	0	0	0	0	0.4188	ANTIGEN
699	LGAENSVAY	7.473	5.347	7.412	5.642	7.566	7.541	7.08	6.762	7.118	5.324	7.055	5.607	8	0.4173	ANTIGEN
1	MFVFLVLLP	7.162	3.742	5.162	4.082	5.23	6.096	5.146	6.136	4.943	3.988	4.981	4.287	1	0.4166	ANTIGEN
1168	DISGINASV	0	0	0	0	0	0	0	0	0	0	0	0	0	0.4155	ANTIGEN
374	FSTFKCYGV	9.467	4.395	6.683	4.461	6.708	7.652	6.706	7.487	6.572	4.179	6.809	5.907	8	0.414	ANTIGEN
819	EDLLFNKVT	0	0	0	0	0	0	0	0	0	0	0	0	0	0.4118	ANTIGEN
183	QGNFKNLRE	0	0	0	0	0	0	0	0	0	0	0	0	0	0.409	ANTIGEN
367	VLYNSASFS	6.568	5.542	6.883	5.78	7.07	6.51	6.653	6.101	6.715	5.877	6.875	5.794	7	0.4029	ANTIGEN
1109	FYEPQIITT	8.127	4.476	7.001	4.803	7.048	7.149	6.875	6.835	6.781	4.593	7.126	5.262	8	0.4027	ANTIGEN
1073	KNFTTAPAI	0	0	0	0	0	0	0	0	0	0	0	0	0	0.4016	ANTIGEN
771	AVEQDKNTQ	0	0	0	0	0	0	0	0	0	0	0	0	0	0.4004	ANTIGEN
745	DSTECSNLL	0	0	0	0	0	0	0	0	0	0	0	0	0	0.3987	NON-ANTIGEN
1256	FDEDDSEPV	7.264	4.152	6.393	4.165	6.558	6.739	6.149	5.45	6.276	4.037	6.841	5.83	5	0.3937	NON-ANTIGEN
233	INITRFQTL	8.929	5.261	7.199	5.293	7.395	8.048	6.662	7.238	6.834	4.67	6.783	6.715	9	0.3934	NON-ANTIGEN
276	LLKYNENGT	6.682	3.744	5.669	3.857	5.828	5.506	5.669	5.734	5.621	3.839	5.697	4.267	1	0.3919	NON-ANTIGEN
855	FNGLTVLPP	8.501	4.164	6.695	4.515	6.757	7.694	6.397	7.674	6.307	4.153	6.156	4.604	7	0.3867	NON-ANTIGEN
1155	YFKNHTSPD	5.173	5.345	6.392	5.699	6.58	5.68	6.154	5.724	6.216	5.937	6.27	4.791	2	0.3867	NON-ANTIGEN
281	ENGTITDAV	0	0	0	0	0	0	0	0	0	0	0	0	0	0.3865	NON-ANTIGEN
208	TPINLVRDL	0	0	0	0	0	0	0	0	0	0	0	0	0	0.3862	NON-ANTIGEN
198	DGYFKIYSK	0	0	0	0	0	0	0	0	0	0	0	0	0	0.3822	NON-ANTIGEN
1069	PAQEKNFTT	0	0	0	0	0	0	0	0	0	0	0	0	0	0.382	NON-ANTIGEN
657	NNSYECDIP	0	0	0	0	0	0	0	0	0	0	0	0	0	0.3819	NON-ANTIGEN
625	HADQLTPTW	0	0	0	0	0	0	0	0	0	0	0	0	0	0.3807	NON-ANTIGEN
1170	SGINASVVN	0	0	0	0	0	0	0	0	0	0	0	0	0	0.3777	NON-ANTIGEN
750	SNLLLQYGS	0	0	0	0	0	0	0	0	0	0	0	0	0	0.3776	NON-ANTIGEN
24	LPPAYTNSF	7.767	4.37	6.279	4.418	6.389	7.421	5.798	6.439	5.961	3.899	6.257	5.848	4	0.3775	NON-ANTIGEN
912	TQNVLYENQ	0	0	0	0	0	0	0	0	0	0	0	0	0	0.3775	NON-ANTIGEN
121	NNATNVVIK	0	0	0	0	0	0	0	0	0	0	0	0	0	0.3765	NON-ANTIGEN
1075	FTTAPAICH	7.051	4.634	7.277	5.082	7.327	7.144	6.823	7.271	6.865	4.744	6.784	4.304	8	0.3761	NON-ANTIGEN
1216	IWLGFIAGL	7.993	4.576	6.675	4.724	6.759	7.881	5.772	6.376	6.076	3.789	6.449	6.404	7	0.3757	NON-ANTIGEN
964	KQLSSNFGA	0	0	0	0	0	0	0	0	0	0	0	0	0	0.3753	NON-ANTIGEN
1040	VDFCGKGYH	5.149	3.851	5.402	4.268	5.617	5.314	5.067	5.284	5.146	4.274	5.807	4.213	0	0.375	NON-ANTIGEN
1191	KNLNESLID	0	0	0	0	0	0	0	0	0	0	0	0	0	0.375	NON-ANTIGEN
1190	AKNLNESLI	0	0	0	0	0	0	0	0	0	0	0	0	0	0.3737	NON-ANTIGEN
885	GWTFGAGAA	0	0	0	0	0	0	0	0	0	0	0	0	0	0.3726	NON-ANTIGEN
1039	RVDFCGKGY	0	0	0	0	0	0	0	0	0	0	0	0	0	0.3717	NON-ANTIGEN
932	GKIQDSLSS	0	0	0	0	0	0	0	0	0	0	0	0	0	0.3702	NON-ANTIGEN
860	VLPPLLTDE	5.367	3.643	5.14	4.027	5.355	4.804	4.999	5.158	4.962	4.047	5.176	3.58	0	0.3699	NON-ANTIGEN
1139	DPLQPELDS	0	0	0	0	0	0	0	0	0	0	0	0	0	0.3674	NON-ANTIGEN
85	PFNDGVYFA	0	0	0	0	0	0	0	0	0	0	0	0	0	0.3651	NON-ANTIGEN
774	QDKNTQEVF	0	0	0	0	0	0	0	0	0	0	0	0	0	0.3632	NON-ANTIGEN
71	SGTNGTKRF	0	0	0	0	0	0	0	0	0	0	0	0	0	0.3615	NON-ANTIGEN
1203	LGKYEQYIK	7.023	4.983	7.073	5.256	7.118	6.172	7.086	6.905	6.995	5.027	6.9	4.527	7	0.3613	NON-ANTIGEN
432	CVIAWNSNN	0	0	0	0	0	0	0	0	0	0	0	0	0	0.3572	NON-ANTIGEN
120	VNNATNVVI	8.101	4.644	5.883	4.777	6.009	7.061	5.457	5.988	5.509	4.171	5.69	6.441	3	0.3557	NON-ANTIGEN
856	NGLTVLPPL	0	0	0	0	0	0	0	0	0	0	0	0	0	0.3547	NON-ANTIGEN
305	SFTVEKGIY	0	0	0	0	0	0	0	0	0	0	0	0	0	0.3544	NON-ANTIGEN
1057	PHGVVFLHV	0	0	0	0	0	0	0	0	0	0	0	0	0	0.3513	NON-ANTIGEN
48	LHSTQDLFL	7.863	4.176	6.101	4.301	6.158	7.076	5.602	6.084	5.684	3.588	5.624	5.614	2	0.3504	NON-ANTIGEN
946	GKLQDVVNQ	0	0	0	0	0	0	0	0	0	0	0	0	0	0.3499	NON-ANTIGEN
1088	HFPREGVFV	0	0	0	0	0	0	0	0	0	0	0	0	0	0.3482	NON-ANTIGEN
1030	SECVLGQSK	0	0	0	0	0	0	0	0	0	0	0	0	0	0.3474	NON-ANTIGEN
981	LSRLDKVEA	8.875	4.708	6.802	5.027	6.952	7.477	6.532	7.717	6.442	4.645	6.28	5.323	7	0.3462	NON-ANTIGEN
1094	VFVSNGTHW	7.299	5.101	6.445	5.327	6.655	7.539	5.902	6.142	6.046	4.797	6.216	6.044	4	0.3438	NON-ANTIGEN
156	EFRVYSSAN	0	0	0	0	0	0	0	0	0	0	0	0	0	0.3435	NON-ANTIGEN
930	AIGKIQDSL	0	0	0	0	0	0	0	0	0	0	0	0	0	0.3428	NON-ANTIGEN
236	TRFQTLLAL	0	0	0	0	0	0	0	0	0	0	0	0	0	0.3406	NON-ANTIGEN
145	YHKNNKSWM	6.159	4.709	5.506	4.813	5.693	5.762	5.296	4.856	5.358	4.681	5.633	5.837	0	0.3388	NON-ANTIGEN
282	NGTITDAVD	0	0	0	0	0	0	0	0	0	0	0	0	0	0.3386	NON-ANTIGEN
847	RDLICAQKF	0	0	0	0	0	0	0	0	0	0	0	0	0	0.3381	NON-ANTIGEN
43	FRSSVLHST	6.654	4.148	6.547	4.289	6.612	6.38	6.04	6.006	6.243	3.901	6.523	4.908	5	0.3365	NON-ANTIGEN
326	IVRFPNITN	7.229	4.042	6.358	4.49	6.436	6.219	6.395	7.29	6.182	4.469	6.07	3.61	5	0.3351	NON-ANTIGEN
748	ECSNLLLQY	0	0	0	0	0	0	0	0	0	0	0	0	0	0.3331	NON-ANTIGEN
82	PVLPFNDGV	0	0	0	0	0	0	0	0	0	0	0	0	0	0.3319	NON-ANTIGEN
1258	EDDSEPVLK	0	0	0	0	0	0	0	0	0	0	0	0	0	0.3319	NON-ANTIGEN
1106	QRNFYEPQI	0	0	0	0	0	0	0	0	0	0	0	0	0	0.3296	NON-ANTIGEN
954	QNAQALNTL	0	0	0	0	0	0	0	0	0	0	0	0	0	0.3288	NON-ANTIGEN
1231	TIMLCCMTS	0	0	0	0	0	0	0	0	0	0	0	0	0	0.3283	NON-ANTIGEN
1107	RNFYEPQII	0	0	0	0	0	0	0	0	0	0	0	0	0	0.3282	NON-ANTIGEN
880	GTITSGWTF	0	0	0	0	0	0	0	0	0	0	0	0	0	0.3272	NON-ANTIGEN
1056	APHGVVFLH	0	0	0	0	0	0	0	0	0	0	0	0	0	0.3255	NON-ANTIGEN
1103	FVTQRNFYE	6.868	5.159	7.654	5.458	7.609	6.815	7.395	7.158	7.415	5.266	7.186	4.705	8	0.3219	NON-ANTIGEN
878	LAGTITSGW	8.327	5.325	7.308	5.505	7.487	8.398	6.737	7.413	6.884	4.874	6.852	6.165	8	0.3218	NON-ANTIGEN
117	LLIVNNATN	6.503	4.044	6.249	4.442	6.389	6.145	5.79	7.015	5.842	4.074	5.598	3.574	3	0.3199	NON-ANTIGEN
1200	LQELGKYEQ	6.81	3.813	5.942	4.1	5.962	5.776	5.679	6.709	5.657	3.662	5.499	3.705	2	0.319	NON-ANTIGEN
963	VKQLSSNFG	7.998	4.912	6.219	5.074	6.353	6.602	5.924	7.033	5.945	4.911	5.941	5.626	4	0.3182	NON-ANTIGEN
325	SIVRFPNIT	0	0	0	0	0	0	0	0	0	0	0	0	0	0.318	NON-ANTIGEN
1135	NTVYDPLQP	0	0	0	0	0	0	0	0	0	0	0	0	0	0.3175	NON-ANTIGEN
552	LTESNKKFL	7.018	3.605	5.457	3.615	5.698	6.123	4.961	5.203	5.165	3.139	5.324	5.236	1	0.3167	NON-ANTIGEN
1220	FIAGLIAIV	7.468	3.869	6.284	4.035	6.368	7.253	5.381	5.911	5.685	3.151	6.04	5.581	3	0.3162	NON-ANTIGEN
300	KCTLKSFTV	0	0	0	0	0	0	0	0	0	0	0	0	0	0.3125	NON-ANTIGEN
1140	PLQPELDSF	0	0	0	0	0	0	0	0	0	0	0	0	0	0.3121	NON-ANTIGEN
497	FQPTNGVGY	8.323	5.318	7.849	5.684	7.994	8.42	7.268	7.633	7.352	5.036	7.118	5.429	8	0.3114	NON-ANTIGEN
312	IYQTSNFRV	9.005	5.555	7.573	5.648	7.501	8.21	7.08	7.454	7.179	4.961	7.199	6.951	9	0.3109	NON-ANTIGEN
274	TFLLKYNEN	0	0	0	0	0	0	0	0	0	0	0	0	0	0.3098	NON-ANTIGEN
354	NRKRISNCV	0	0	0	0	0	0	0	0	0	0	0	0	0	0.3087	NON-ANTIGEN
252	GDSSSGWTA	0	0	0	0	0	0	0	0	0	0	0	0	0	0.3077	NON-ANTIGEN
491	PLQSYGFQP	0	0	0	0	0	0	0	0	0	0	0	0	0	0.3077	NON-ANTIGEN
88	DGVYFASTE	0	0	0	0	0	0	0	0	0	0	0	0	0	0.3061	NON-ANTIGEN
859	TVLPPLLTD	0	0	0	0	0	0	0	0	0	0	0	0	0	0.3048	NON-ANTIGEN
747	TECSNLLLQ	0	0	0	0	0	0	0	0	0	0	0	0	0	0.3027	NON-ANTIGEN
881	TITSGWTFG	0	0	0	0	0	0	0	0	0	0	0	0	0	0.3011	NON-ANTIGEN
369	YNSASFSTF	7.883	5.363	6.185	5.465	6.346	7.377	5.735	6.479	5.85	4.958	6.112	6.914	5	0.3005	NON-ANTIGEN
1255	KFDEDDSEP	0	0	0	0	0	0	0	0	0	0	0	0	0	0.2963	NON-ANTIGEN
594	GVSVITPGT	0	0	0	0	0	0	0	0	0	0	0	0	0	0.2957	NON-ANTIGEN
1117	TDNTFVSGN	0	0	0	0	0	0	0	0	0	0	0	0	0	0.2933	NON-ANTIGEN
673	SYQTQTNSP	0	0	0	0	0	0	0	0	0	0	0	0	0	0.2919	NON-ANTIGEN
1131	GIVNNTVYD	0	0	0	0	0	0	0	0	0	0	0	0	0	0.2893	NON-ANTIGEN
686	SVASQSIIA	0	0	0	0	0	0	0	0	0	0	0	0	0	0.2882	NON-ANTIGEN
749	CSNLLLQYG	0	0	0	0	0	0	0	0	0	0	0	0	0	0.285	NON-ANTIGEN
77	KRFDNPVLP	0	0	0	0	0	0	0	0	0	0	0	0	0	0.2834	NON-ANTIGEN
242	LALHRSYLT	6.905	4.847	6.83	4.991	6.853	6.406	6.683	5.993	6.717	4.895	6.943	5.441	7	0.2825	NON-ANTIGEN
624	IHADQLTPT	7.205	5.01	7.13	5.239	7.347	6.811	6.879	6.085	6.955	5.179	7.304	5.753	7	0.2821	NON-ANTIGEN
396	YADSFVIRG	7.147	5.576	6.603	5.889	6.646	6.67	6.097	6.031	6.184	5.628	6.32	6.358	6	0.2816	NON-ANTIGEN
164	NNCTFEYVS	0	0	0	0	0	0	0	0	0	0	0	0	0	0.2815	NON-ANTIGEN
879	AGTITSGWT	0	0	0	0	0	0	0	0	0	0	0	0	0	0.2806	NON-ANTIGEN
1253	CCKFDEDDS	0	0	0	0	0	0	0	0	0	0	0	0	0	0.28	NON-ANTIGEN
500	TNGVGYQPY	0	0	0	0	0	0	0	0	0	0	0	0	0	0.2799	NON-ANTIGEN
372	ASFSTFKCY	0	0	0	0	0	0	0	0	0	0	0	0	0	0.2795	NON-ANTIGEN
982	SRLDKVEAE	0	0	0	0	0	0	0	0	0	0	0	0	0	0.2788	NON-ANTIGEN
811	KPSKRSFIE	0	0	0	0	0	0	0	0	0	0	0	0	0	0.2768	NON-ANTIGEN
783	AQVKQIYKT	0	0	0	0	0	0	0	0	0	0	0	0	0	0.2758	NON-ANTIGEN
597	VITPGTNTS	5.733	3.833	5.203	4.032	5.311	5.135	5.059	5.255	5.087	4.118	5.527	4.399	0	0.2753	NON-ANTIGEN
1014	RAAEIRASA	0	0	0	0	0	0	0	0	0	0	0	0	0	0.2752	NON-ANTIGEN
980	ILSRLDKVE	7.715	6.332	8.354	6.535	8.706	7.196	8.202	7.84	8.236	6.604	7.367	5.267	11	0.2747	NON-ANTIGEN
1010	QQLIRAAEI	0	0	0	0	0	0	0	0	0	0	0	0	0	0.2742	NON-ANTIGEN
818	IEDLLFNKV	8.465	3.872	5.835	3.91	5.969	6.825	5.559	6.752	5.581	3.427	5.681	5.366	3	0.2737	NON-ANTIGEN
368	LYNSASFST	7.182	4.957	7.051	5.19	6.955	6.95	6.578	6.42	6.692	4.696	6.918	5.661	8	0.2718	NON-ANTIGEN
617	CTEVPVAIH	0	0	0	0	0	0	0	0	0	0	0	0	0	0.2717	NON-ANTIGEN
773	EQDKNTQEV	0	0	0	0	0	0	0	0	0	0	0	0	0	0.2717	NON-ANTIGEN
786	KQIYKTPPI	0	0	0	0	0	0	0	0	0	0	0	0	0	0.2705	NON-ANTIGEN
152	WMESEFRVY	7.283	4.657	7.027	4.788	7.253	6.984	6.537	6.83	6.754	4.432	6.751	5.171	8	0.2698	NON-ANTIGEN
299	TKCTLKSFT	0	0	0	0	0	0	0	0	0	0	0	0	0	0.2695	NON-ANTIGEN
618	TEVPVAIHA	0	0	0	0	0	0	0	0	0	0	0	0	0	0.2687	NON-ANTIGEN
309	EKGIYQTSN	0	0	0	0	0	0	0	0	0	0	0	0	0	0.2672	NON-ANTIGEN
607	QVAVLYQDV	0	0	0	0	0	0	0	0	0	0	0	0	0	0.265	NON-ANTIGEN
794	IKDFGGFNF	9.788	5.042	7.145	5.232	7.085	8.668	7.125	7.94	6.939	4.83	7.186	6.361	9	0.2649	NON-ANTIGEN
1219	GFIAGLIAI	0	0	0	0	0	0	0	0	0	0	0	0	0	0.264	NON-ANTIGEN
634	RVYSTGSNV	0	0	0	0	0	0	0	0	0	0	0	0	0	0.2636	NON-ANTIGEN
209	PINLVRDLP	0	0	0	0	0	0	0	0	0	0	0	0	0	0.2627	NON-ANTIGEN
688	ASQSIIAYT	0	0	0	0	0	0	0	0	0	0	0	0	0	0.2625	NON-ANTIGEN
689	SQSIIAYTM	0	0	0	0	0	0	0	0	0	0	0	0	0	0.2614	NON-ANTIGEN
169	EYVSQPFLM	0	0	0	0	0	0	0	0	0	0	0	0	0	0.2605	NON-ANTIGEN
931	IGKIQDSLS	7.922	4.276	6.448	4.556	6.625	6.851	6.127	7.521	6.123	4.29	6.03	4.579	5	0.2601	NON-ANTIGEN
924	ANQFNSAIG	0	0	0	0	0	0	0	0	0	0	0	0	0	0.2578	NON-ANTIGEN
862	PPLLTDEMI	0	0	0	0	0	0	0	0	0	0	0	0	0	0.2568	NON-ANTIGEN
776	KNTQEVFAQ	0	0	0	0	0	0	0	0	0	0	0	0	0	0.2559	NON-ANTIGEN
479	PCNGVEGFN	0	0	0	0	0	0	0	0	0	0	0	0	0	0.2543	NON-ANTIGEN
1227	IVMVTIMLC	7.775	4.348	6.589	4.681	6.644	7.343	6.095	7.498	6.133	4.455	5.974	4.69	5	0.2528	NON-ANTIGEN
784	QVKQIYKTP	0	0	0	0	0	0	0	0	0	0	0	0	0	0.2497	NON-ANTIGEN
290	DCALDPLSE	0	0	0	0	0	0	0	0	0	0	0	0	0	0.2481	NON-ANTIGEN
623	AIHADQLTP	0	0	0	0	0	0	0	0	0	0	0	0	0	0.2461	NON-ANTIGEN
780	EVFAQVKQI	0	0	0	0	0	0	0	0	0	0	0	0	0	0.2447	NON-ANTIGEN
253	DSSSGWTAG	0	0	0	0	0	0	0	0	0	0	0	0	0	0.2444	NON-ANTIGEN
102	RGWIFGTTL	0	0	0	0	0	0	0	0	0	0	0	0	0	0.2419	NON-ANTIGEN
1133	VNNTVYDPL	7.105	4.482	5.606	4.45	5.697	6.463	5.084	5.683	5.279	3.834	5.446	6.107	2	0.2397	NON-ANTIGEN
690	QSIIAYTMS	0	0	0	0	0	0	0	0	0	0	0	0	0	0.2389	NON-ANTIGEN
1230	VTIMLCCMT	7.098	4.66	5.997	4.863	6.002	6.343	5.773	6.34	5.751	4.513	5.997	5.368	3	0.2373	NON-ANTIGEN
853	QKFNGLTVL	0	0	0	0	0	0	0	0	0	0	0	0	0	0.2349	NON-ANTIGEN
373	SFSTFKCYG	0	0	0	0	0	0	0	0	0	0	0	0	0	0.2312	NON-ANTIGEN
998	TGRLQSLQT	0	0	0	0	0	0	0	0	0	0	0	0	0	0.2305	NON-ANTIGEN
173	QPFLMDLEG	0	0	0	0	0	0	0	0	0	0	0	0	0	0.23	NON-ANTIGEN
308	VEKGIYQTS	5.8	4.514	5.921	4.73	6.052	5.804	5.057	5.801	5.41	4.223	5.541	5.114	0	0.2274	NON-ANTIGEN
134	QFCNDPFLG	0	0	0	0	0	0	0	0	0	0	0	0	0	0.2264	NON-ANTIGEN
1046	GYHLMSFPQ	0	0	0	0	0	0	0	0	0	0	0	0	0	0.2245	NON-ANTIGEN
779	QEVFAQVKQ	0	0	0	0	0	0	0	0	0	0	0	0	0	0.2235	NON-ANTIGEN
1054	QSAPHGVVF	0	0	0	0	0	0	0	0	0	0	0	0	0	0.2234	NON-ANTIGEN
1087	AHFPREGVF	0	0	0	0	0	0	0	0	0	0	0	0	0	0.2229	NON-ANTIGEN
658	NSYECDIPI	0	0	0	0	0	0	0	0	0	0	0	0	0	0.2216	NON-ANTIGEN
916	LYENQKLIA	7.278	4.977	6.993	5.202	7.058	6.82	6.805	6.241	6.803	5.133	6.924	5.672	7	0.2204	NON-ANTIGEN
1247	CCSCGSCCK	0	0	0	0	0	0	0	0	0	0	0	0	0	0.2193	NON-ANTIGEN
171	VSQPFLMDL	8.27	4.834	6.099	4.958	6.142	7.14	5.977	6.143	5.921	4.63	6.45	6.667	4	0.2178	NON-ANTIGEN
146	HKNNKSWME	0	0	0	0	0	0	0	0	0	0	0	0	0	0.2171	NON-ANTIGEN
775	DKNTQEVFA	0	0	0	0	0	0	0	0	0	0	0	0	0	0.2163	NON-ANTIGEN
207	HTPINLVRD	0	0	0	0	0	0	0	0	0	0	0	0	0	0.2129	NON-ANTIGEN
1116	TTDNTFVSG	0	0	0	0	0	0	0	0	0	0	0	0	0	0.2128	NON-ANTIGEN
863	PLLTDEMIA	0	0	0	0	0	0	0	0	0	0	0	0	0	0.2127	NON-ANTIGEN
1053	PQSAPHGVV	0	0	0	0	0	0	0	0	0	0	0	0	0	0.2116	NON-ANTIGEN
516	ELLHAPATV	0	0	0	0	0	0	0	0	0	0	0	0	0	0.2109	NON-ANTIGEN
340	EVFNATRFA	0	0	0	0	0	0	0	0	0	0	0	0	0	0.2087	NON-ANTIGEN
621	PVAIHADQL	0	0	0	0	0	0	0	0	0	0	0	0	0	0.2064	NON-ANTIGEN
801	NFSQILPDP	0	0	0	0	0	0	0	0	0	0	0	0	0	0.2058	NON-ANTIGEN
238	FQTLLALHR	7.369	4.185	6.839	4.658	6.901	6.527	6.558	7.285	6.467	3.964	6.176	3.5	7	0.2055	NON-ANTIGEN
593	GGVSVITPG	0	0	0	0	0	0	0	0	0	0	0	0	0	0.2044	NON-ANTIGEN
1186	LNEVAKNLN	6.59	4.367	6.519	4.669	6.64	6.247	6.039	7.276	6.161	4.331	5.984	3.935	4	0.2022	NON-ANTIGEN
949	QDVVNQNAQ	0	0	0	0	0	0	0	0	0	0	0	0	0	0.2016	NON-ANTIGEN
166	CTFEYVSQP	0	0	0	0	0	0	0	0	0	0	0	0	0	0.2003	NON-ANTIGEN
334	NLCPFGEVF	0	0	0	0	0	0	0	0	0	0	0	0	0	0.1999	NON-ANTIGEN
777	NTQEVFAQV	0	0	0	0	0	0	0	0	0	0	0	0	0	0.197	NON-ANTIGEN
1229	MVTIMLCCM	7.556	4.144	5.457	4.331	5.453	6.677	5.107	6.398	5.093	3.723	5.333	5.336	3	0.1969	NON-ANTIGEN
572	TTDAVRDPQ	0	0	0	0	0	0	0	0	0	0	0	0	0	0.1958	NON-ANTIGEN
51	TQDLFLPFF	0	0	0	0	0	0	0	0	0	0	0	0	0	0.1954	NON-ANTIGEN
118	LIVNNATNV	8.691	5.626	7.512	5.735	7.755	7.952	7.28	6.671	7.326	5.545	7.527	6.98	9	0.1942	NON-ANTIGEN
571	DTTDAVRDP	0	0	0	0	0	0	0	0	0	0	0	0	0	0.194	NON-ANTIGEN
620	VPVAIHADQ	6.024	4.537	5.975	4.85	6.105	5.701	5.546	5.968	5.639	4.451	5.668	4.59	0	0.1909	NON-ANTIGEN
49	HSTQDLFLP	0	0	0	0	0	0	0	0	0	0	0	0	0	0.1904	NON-ANTIGEN
927	FNSAIGKIQ	7.719	5.189	7.71	5.489	7.957	7.415	7.198	7.463	7.358	5.092	7.211	4.94	8	0.1896	NON-ANTIGEN
301	CTLKSFTVE	0	0	0	0	0	0	0	0	0	0	0	0	0	0.186	NON-ANTIGEN
366	SVLYNSASF	0	0	0	0	0	0	0	0	0	0	0	0	0	0.1857	NON-ANTIGEN
78	RFDNPVLPF	0	0	0	0	0	0	0	0	0	0	0	0	0	0.1828	NON-ANTIGEN
1185	RLNEVAKNL	0	0	0	0	0	0	0	0	0	0	0	0	0	0.182	NON-ANTIGEN
363	ADYSVLYNS	0	0	0	0	0	0	0	0	0	0	0	0	0	0.1814	NON-ANTIGEN
76	TKRFDNPVL	0	0	0	0	0	0	0	0	0	0	0	0	0	0.1808	NON-ANTIGEN
80	DNPVLPFND	0	0	0	0	0	0	0	0	0	0	0	0	0	0.1802	NON-ANTIGEN
1189	VAKNLNESL	7.791	5.531	6.617	5.494	6.809	7.102	6.423	5.998	6.52	5.317	6.837	7.158	8	0.179	NON-ANTIGEN
743	CGDSTECSN	0	0	0	0	0	0	0	0	0	0	0	0	0	0.1786	NON-ANTIGEN
1108	NFYEPQIIT	0	0	0	0	0	0	0	0	0	0	0	0	0	0.1785	NON-ANTIGEN
1238	TSCCSCLKG	0	0	0	0	0	0	0	0	0	0	0	0	0	0.178	NON-ANTIGEN
256	SGWTAGAAA	0	0	0	0	0	0	0	0	0	0	0	0	0	0.1768	NON-ANTIGEN
1027	TKMSECVLG	0	0	0	0	0	0	0	0	0	0	0	0	0	0.1761	NON-ANTIGEN
710	NSIAIPTNF	0	0	0	0	0	0	0	0	0	0	0	0	0	0.1744	NON-ANTIGEN
341	VFNATRFAS	6.493	4.778	6.211	5.048	6.121	6.05	5.798	6.257	5.866	4.724	5.965	5.222	1	0.1739	NON-ANTIGEN
785	VKQIYKTPP	7.631	4.241	5.624	4.529	5.856	6.594	5.28	6.901	5.259	4.225	5.09	4.789	3	0.1738	NON-ANTIGEN
47	VLHSTQDLF	5.45	3.264	4.443	3.263	4.51	5.389	3.955	4.311	4.165	2.803	4.633	4.921	0	0.1734	NON-ANTIGEN
830	DAGFIKQYG	0	0	0	0	0	0	0	0	0	0	0	0	0	0.1689	NON-ANTIGEN
371	SASFSTFKC	0	0	0	0	0	0	0	0	0	0	0	0	0	0.1686	NON-ANTIGEN
398	DSFVIRGDE	0	0	0	0	0	0	0	0	0	0	0	0	0	0.1674	NON-ANTIGEN
119	IVNNATNVV	7.076	4.282	6.199	4.278	6.336	6.507	5.963	5.338	6.073	4.101	6.432	5.736	4	0.1659	NON-ANTIGEN
1252	SCCKFDEDD	0	0	0	0	0	0	0	0	0	0	0	0	0	0.1653	NON-ANTIGEN
557	KKFLPFQQF	0	0	0	0	0	0	0	0	0	0	0	0	0	0.1647	NON-ANTIGEN
700	GAENSVAYS	0	0	0	0	0	0	0	0	0	0	0	0	0	0.1589	NON-ANTIGEN
1081	ICHDGKAHF	7.637	4.727	6.718	4.814	6.848	7.441	6.497	6.068	6.566	4.647	7.119	6.394	8	0.1567	NON-ANTIGEN
530	STNLVKNKC	0	0	0	0	0	0	0	0	0	0	0	0	0	0.1548	NON-ANTIGEN
1228	VMVTIMLCC	6.944	5.068	6.499	5.392	6.556	6.9	5.968	6.725	6.05	5.216	5.824	5.335	5	0.1547	NON-ANTIGEN
1217	WLGFIAGLI	9.122	3.387	5.703	3.572	6	7.374	5.673	6.587	5.497	3.263	5.755	5.105	3	0.1544	NON-ANTIGEN
1244	LKGCCSCGS	5.165	3.084	5.237	3.333	5.165	5.343	4.911	4.909	5.019	3.274	6.009	4.158	0	0.151	NON-ANTIGEN
221	SALEPLVDL	0	0	0	0	0	0	0	0	0	0	0	0	0	0.1494	NON-ANTIGEN
346	RFASVYAWN	0	0	0	0	0	0	0	0	0	0	0	0	0	0.1481	NON-ANTIGEN
1132	IVNNTVYDP	6.696	4.704	6.79	4.863	6.812	6.846	6.563	6.147	6.629	4.881	6.818	5.269	7	0.1414	NON-ANTIGEN
852	AQKFNGLTV	0	0	0	0	0	0	0	0	0	0	0	0	0	0.1405	NON-ANTIGEN
782	FAQVKQIYK	7.947	4.892	7.528	5.343	7.588	7.227	7.066	7.85	7.067	4.562	6.772	4.442	8	0.1399	NON-ANTIGEN
884	SGWTFGAGA	0	0	0	0	0	0	0	0	0	0	0	0	0	0.1384	NON-ANTIGEN
1047	YHLMSFPQS	6.58	4.792	5.768	5.033	5.746	5.814	5.551	6.29	5.527	4.853	5.618	5.174	1	0.1372	NON-ANTIGEN
687	VASQSIIAY	7.321	5.712	7.099	6.027	7.193	7.236	6.782	6.607	6.775	5.631	6.545	5.819	8	0.1366	NON-ANTIGEN
835	KQYGDCLGD	0	0	0	0	0	0	0	0	0	0	0	0	0	0.1366	NON-ANTIGEN
525	CGPKKSTNL	0	0	0	0	0	0	0	0	0	0	0	0	0	0.1363	NON-ANTIGEN
154	ESEFRVYSS	0	0	0	0	0	0	0	0	0	0	0	0	0	0.1352	NON-ANTIGEN
251	PGDSSSGWT	0	0	0	0	0	0	0	0	0	0	0	0	0	0.1337	NON-ANTIGEN
250	TPGDSSSGW	0	0	0	0	0	0	0	0	0	0	0	0	0	0.133	NON-ANTIGEN
596	SVITPGTNT	0	0	0	0	0	0	0	0	0	0	0	0	0	0.1305	NON-ANTIGEN
708	SNNSIAIPT	0	0	0	0	0	0	0	0	0	0	0	0	0	0.128	NON-ANTIGEN
1184	DRLNEVAKN	0	0	0	0	0	0	0	0	0	0	0	0	0	0.128	NON-ANTIGEN
1025	AATKMSECV	0	0	0	0	0	0	0	0	0	0	0	0	0	0.1278	NON-ANTIGEN
1134	NNTVYDPLQ	0	0	0	0	0	0	0	0	0	0	0	0	0	0.1274	NON-ANTIGEN
75	GTKRFDNPV	0	0	0	0	0	0	0	0	0	0	0	0	0	0.1269	NON-ANTIGEN
212	LVRDLPQGF	7.556	4.814	6.656	4.819	6.833	7.264	6.441	6.049	6.56	4.711	7.053	6.456	8	0.1234	NON-ANTIGEN
170	YVSQPFLMD	6.119	5.912	6.985	6.314	7.069	6.249	6.703	6.698	6.706	6.332	6.343	5.145	8	0.1232	NON-ANTIGEN
370	NSASFSTFK	0	0	0	0	0	0	0	0	0	0	0	0	0	0.1232	NON-ANTIGEN
560	LPFQQFGRD	6.056	4.634	6.783	5.054	7.096	6.267	6.47	6.587	6.5	5.161	6.202	3.905	5	0.1221	NON-ANTIGEN
362	VADYSVLYN	6.682	5.176	6.701	5.624	6.789	6.251	6.68	6.725	6.521	5.651	6.321	4.475	7	0.1213	NON-ANTIGEN
447	GNYNYLYRL	0	0	0	0	0	0	0	0	0	0	0	0	0	0.117	NON-ANTIGEN
220	FSALEPLVD	7.953	4.741	7.377	5.197	7.439	7.33	7.128	8.417	7.038	5.049	6.732	4.151	8	0.116	NON-ANTIGEN
254	SSSGWTAGA	0	0	0	0	0	0	0	0	0	0	0	0	0	0.1148	NON-ANTIGEN
87	NDGVYFAST	0	0	0	0	0	0	0	0	0	0	0	0	0	0.1133	NON-ANTIGEN
364	DYSVLYNSA	0	0	0	0	0	0	0	0	0	0	0	0	0	0.1131	NON-ANTIGEN
73	TNGTKRFDN	0	0	0	0	0	0	0	0	0	0	0	0	0	0.113	NON-ANTIGEN
869	MIAQYTSAL	8.181	5.624	6.77	5.703	6.976	7.587	6.434	6.296	6.501	5.288	6.527	6.918	8	0.1114	NON-ANTIGEN
763	LNRALTGIA	8.04	4.895	6.987	5.212	7.255	7.616	6.494	6.987	6.573	4.864	6.701	5.634	8	0.1108	NON-ANTIGEN
147	KNNKSWMES	0	0	0	0	0	0	0	0	0	0	0	0	0	0.1095	NON-ANTIGEN
64	WFHAIHVSG	8.606	5.034	7.49	5.306	7.616	7.639	7.067	7.536	7.12	5.094	7.158	5.875	8	0.1089	NON-ANTIGEN
1183	IDRLNEVAK	7.844	4.684	6.995	5.133	7.145	6.773	6.728	7.572	6.639	4.53	6.344	4.206	8	0.1081	NON-ANTIGEN
517	LLHAPATVC	7.236	4.427	6.534	4.73	6.75	7.086	6.058	6.884	6.157	4.718	6.153	4.86	5	0.105	NON-ANTIGEN
1043	CGKGYHLMS	0	0	0	0	0	0	0	0	0	0	0	0	0	0.1047	NON-ANTIGEN
637	STGSNVFQT	0	0	0	0	0	0	0	0	0	0	0	0	0	0.1045	NON-ANTIGEN
865	LTDEMIAQY	6.963	4.976	7.016	5.226	7.174	7.111	6.663	6.366	6.741	4.928	6.771	5.299	8	0.1043	NON-ANTIGEN
679	NSPRRARSV	0	0	0	0	0	0	0	0	0	0	0	0	0	0.1034	NON-ANTIGEN
355	RKRISNCVA	0	0	0	0	0	0	0	0	0	0	0	0	0	0.0986	NON-ANTIGEN
103	GWIFGTTLD	0	0	0	0	0	0	0	0	0	0	0	0	0	0.0936	NON-ANTIGEN
788	IYKTPPIKD	6.147	4.418	6.738	4.859	6.806	6.336	6.23	6.824	6.303	4.62	5.947	3.754	5	0.0905	NON-ANTIGEN
255	SSGWTAGAA	0	0	0	0	0	0	0	0	0	0	0	0	0	0.09	NON-ANTIGEN
1026	ATKMSECVL	0	0	0	0	0	0	0	0	0	0	0	0	0	0.0899	NON-ANTIGEN
483	VEGFNCYFP	6.884	3.735	5.061	3.917	5.087	5.815	5.085	6.165	4.95	3.905	5.07	4.402	1	0.0855	NON-ANTIGEN
870	IAQYTSALL	8.143	3.886	5.85	3.994	6.029	6.88	5.836	5.982	5.718	3.758	5.863	5.299	2	0.0823	NON-ANTIGEN
302	TLKSFTVEK	0	0	0	0	0	0	0	0	0	0	0	0	0	0.0809	NON-ANTIGEN
1095	FVSNGTHWF	6.271	3.273	5.501	3.276	5.599	6.163	5.269	4.862	5.372	3.082	5.742	4.671	0	0.0807	NON-ANTIGEN
344	ATRFASVYA	0	0	0	0	0	0	0	0	0	0	0	0	0	0.0785	NON-ANTIGEN
1076	TTAPAICHD	0	0	0	0	0	0	0	0	0	0	0	0	0	0.0772	NON-ANTIGEN
983	RLDKVEAEV	0	0	0	0	0	0	0	0	0	0	0	0	0	0.0765	NON-ANTIGEN
866	TDEMIAQYT	0	0	0	0	0	0	0	0	0	0	0	0	0	0.0728	NON-ANTIGEN
868	EMIAQYTSA	0	0	0	0	0	0	0	0	0	0	0	0	0	0.0727	NON-ANTIGEN
1099	GTHWFVTQR	0	0	0	0	0	0	0	0	0	0	0	0	0	0.0723	NON-ANTIGEN
347	FASVYAWNR	6.353	3.902	6.524	4.263	6.378	5.978	6.059	6.712	6.114	3.404	5.939	3.333	4	0.0713	NON-ANTIGEN
622	VAIHADQLT	6.812	5.292	6.525	5.406	6.728	6.08	6.393	5.872	6.449	5.413	6.602	5.913	6	0.071	NON-ANTIGEN
772	VEQDKNTQE	4.83	4.274	5.69	4.578	5.906	4.852	5.478	4.851	5.554	4.692	5.788	4.227	0	0.0684	NON-ANTIGEN
35	GVYYPDKVF	0	0	0	0	0	0	0	0	0	0	0	0	0	0.0652	NON-ANTIGEN
446	GGNYNYLYR	0	0	0	0	0	0	0	0	0	0	0	0	0	0.0647	NON-ANTIGEN
430	TGCVIAWNS	0	0	0	0	0	0	0	0	0	0	0	0	0	0.0645	NON-ANTIGEN
979	DILSRLDKV	0	0	0	0	0	0	0	0	0	0	0	0	0	0.0582	NON-ANTIGEN
1122	VSGNCDVVI	7.944	5.253	6.413	5.334	6.566	7.134	6.236	5.733	6.236	5.074	6.473	6.954	6	0.0579	NON-ANTIGEN
971	GAISSVLND	0	0	0	0	0	0	0	0	0	0	0	0	0	0.0578	NON-ANTIGEN
1055	SAPHGVVFL	0	0	0	0	0	0	0	0	0	0	0	0	0	0.0569	NON-ANTIGEN
595	VSVITPGTN	6.803	4.444	5.977	4.912	6.262	6.171	5.639	7.068	5.597	4.649	5.373	3.973	2	0.0551	NON-ANTIGEN
948	LQDVVNQNA	7.814	4.239	6.238	4.412	6.426	6.72	5.773	7.016	5.874	3.983	5.727	4.915	4	0.0526	NON-ANTIGEN
186	FKNLREFVF	8.525	3.621	5.985	3.767	5.918	7.399	5.738	7.007	5.664	3.152	5.721	4.987	3	0.0523	NON-ANTIGEN
453	YRLFRKSNL	9.023	5.125	5.916	5.226	6.106	7.226	5.915	6.886	5.777	4.934	6.05	6.793	4	0.0522	NON-ANTIGEN
709	NNSIAIPTN	0	0	0	0	0	0	0	0	0	0	0	0	0	0.0488	NON-ANTIGEN
972	AISSVLNDI	0	0	0	0	0	0	0	0	0	0	0	0	0	0.0479	NON-ANTIGEN
1188	EVAKNLNES	0	0	0	0	0	0	0	0	0	0	0	0	0	0.0468	NON-ANTIGEN
531	TNLVKNKCV	0	0	0	0	0	0	0	0	0	0	0	0	0	0.0466	NON-ANTIGEN
184	GNFKNLREF	0	0	0	0	0	0	0	0	0	0	0	0	0	0.0458	NON-ANTIGEN
955	NAQALNTLV	0	0	0	0	0	0	0	0	0	0	0	0	0	0.0423	NON-ANTIGEN
1243	CLKGCCSCG	0	0	0	0	0	0	0	0	0	0	0	0	0	0.0415	NON-ANTIGEN
836	QYGDCLGDI	0	0	0	0	0	0	0	0	0	0	0	0	0	0.041	NON-ANTIGEN
735	SVDCTMYIC	0	0	0	0	0	0	0	0	0	0	0	0	0	0.0408	NON-ANTIGEN
922	LIANQFNSA	6.745	4.758	6.658	4.823	6.794	6.378	6.455	5.995	6.564	4.867	6.82	5.569	7	0.0376	NON-ANTIGEN
270	LQPRTFLLK	7.707	6.422	8.484	6.77	8.626	7.267	8.343	7.598	8.269	6.416	7.505	5.339	11	0.0371	NON-ANTIGEN
104	WIFGTTLDS	7.136	4.671	7.291	5.041	7.284	7.409	6.404	6.915	6.667	4.383	6.789	5.134	8	0.0338	NON-ANTIGEN
304	KSFTVEKGI	0	0	0	0	0	0	0	0	0	0	0	0	0	0.0337	NON-ANTIGEN
155	SEFRVYSSA	0	0	0	0	0	0	0	0	0	0	0	0	0	0.0315	NON-ANTIGEN
867	DEMIAQYTS	0	0	0	0	0	0	0	0	0	0	0	0	0	0.0313	NON-ANTIGEN
52	QDLFLPFFS	0	0	0	0	0	0	0	0	0	0	0	0	0	0.0304	NON-ANTIGEN
471	EIYQAGSTP	0	0	0	0	0	0	0	0	0	0	0	0	0	0.0298	NON-ANTIGEN
565	FGRDIADTT	6.055	4.018	6.369	4.117	6.442	5.986	6.125	5.314	6.266	4.075	6.864	4.919	3	0.0295	NON-ANTIGEN
619	EVPVAIHAD	0	0	0	0	0	0	0	0	0	0	0	0	0	0.0294	NON-ANTIGEN
917	YENQKLIAN	6.279	5.988	7.087	6.425	7.182	6.407	6.777	6.578	6.771	6.269	6.412	5.2	8	0.0293	NON-ANTIGEN
789	YKTPPIKDF	8.234	5.357	6.163	5.427	6.408	7.188	6.011	6.42	6.034	5.252	6.392	6.895	6	0.0287	NON-ANTIGEN
391	CFTNVYADS	0	0	0	0	0	0	0	0	0	0	0	0	0	0.028	NON-ANTIGEN
303	LKSFTVEKG	7.943	3.861	5.878	4.065	6.073	6.247	5.839	6.637	5.735	4.152	5.86	4.609	2	0.0213	NON-ANTIGEN
684	ARSVASQSI	0	0	0	0	0	0	0	0	0	0	0	0	0	0.0161	NON-ANTIGEN
79	FDNPVLPFN	6.218	3.987	6.582	4.333	6.534	6.161	6.464	6.625	6.434	4.349	6.853	3.896	6	0.0146	NON-ANTIGEN
532	NLVKNKCVN	0	0	0	0	0	0	0	0	0	0	0	0	0	0.0146	NON-ANTIGEN
400	FVIRGDEVR	6.95	5.667	8.019	5.895	8.288	6.66	7.871	7.221	7.896	5.627	7.185	4.463	8	0.0083	NON-ANTIGEN
762	QLNRALTGI	0	0	0	0	0	0	0	0	0	0	0	0	0	0.008	NON-ANTIGEN
1050	MSFPQSAPH	5.912	4.383	5.869	4.759	5.997	5.725	5.743	5.995	5.7	4.809	5.997	4.315	0	0.0069	NON-ANTIGEN
132	EFQFCNDPF	0	0	0	0	0	0	0	0	0	0	0	0	0	0.0062	NON-ANTIGEN
476	GSTPCNGVE	0	0	0	0	0	0	0	0	0	0	0	0	0	0.0021	NON-ANTIGEN
356	KRISNCVAD	0	0	0	0	0	0	0	0	0	0	0	0	0	0.0005	NON-ANTIGEN
469	STEIYQAGS	0	0	0	0	0	0	0	0	0	0	0	0	0	-0.002	NON-ANTIGEN
1052	FPQSAPHGV	7.839	4.459	6.704	4.446	6.769	7.234	6.232	6.361	6.435	3.992	6.834	6.157	7	-0.0058	NON-ANTIGEN
223	LEPLVDLPI	9.738	4.673	6.605	4.811	6.668	8.048	6.366	7.539	6.275	4.185	6.278	6.331	7	-0.0069	NON-ANTIGEN
1118	DNTFVSGNC	0	0	0	0	0	0	0	0	0	0	0	0	0	-0.0078	NON-ANTIGEN
343	NATRFASVY	0	0	0	0	0	0	0	0	0	0	0	0	0	-0.0081	NON-ANTIGEN
1003	SLQTYVTQQ	0	0	0	0	0	0	0	0	0	0	0	0	0	-0.0089	NON-ANTIGEN
923	IANQFNSAI	8.85	5.334	7.21	5.347	7.417	8.011	6.92	6.893	6.987	4.977	7.033	6.88	9	-0.01	NON-ANTIGEN
1245	KGCCSCGSC	0	0	0	0	0	0	0	0	0	0	0	0	0	-0.0125	NON-ANTIGEN
1082	CHDGKAHFP	0	0	0	0	0	0	0	0	0	0	0	0	0	-0.0132	NON-ANTIGEN
470	TEIYQAGST	0	0	0	0	0	0	0	0	0	0	0	0	0	-0.0171	NON-ANTIGEN
337	PFGEVFNAT	0	0	0	0	0	0	0	0	0	0	0	0	0	-0.0193	NON-ANTIGEN
926	QFNSAIGKI	0	0	0	0	0	0	0	0	0	0	0	0	0	-0.0231	NON-ANTIGEN
467	DISTEIYQA	0	0	0	0	0	0	0	0	0	0	0	0	0	-0.0243	NON-ANTIGEN
987	VEAEVQIDR	5.994	5.573	7.068	5.979	7.146	6.001	6.759	6.06	6.786	5.504	6.616	4.915	5	-0.0275	NON-ANTIGEN
498	QPTNGVGYQ	0	0	0	0	0	0	0	0	0	0	0	0	0	-0.0284	NON-ANTIGEN
361	CVADYSVLY	0	0	0	0	0	0	0	0	0	0	0	0	0	-0.0293	NON-ANTIGEN
185	NFKNLREFV	0	0	0	0	0	0	0	0	0	0	0	0	0	-0.0294	NON-ANTIGEN
307	TVEKGIYQT	0	0	0	0	0	0	0	0	0	0	0	0	0	-0.0296	NON-ANTIGEN
338	FGEVFNATR	7.162	4.385	6.972	4.78	7.113	6.574	6.514	7.382	6.566	4.039	6.325	3.847	8	-0.0302	NON-ANTIGEN
1012	LIRAAEIRA	8.16	5.077	7.174	5.364	7.223	7.548	6.743	7.193	6.785	4.953	6.842	5.843	8	-0.0308	NON-ANTIGEN
472	IYQAGSTPC	7.18	4.288	6.477	4.586	6.693	7.03	6.006	6.838	6.105	4.579	6.101	4.724	5	-0.0319	NON-ANTIGEN
163	ANNCTFEYV	0	0	0	0	0	0	0	0	0	0	0	0	0	-0.0332	NON-ANTIGEN
468	ISTEIYQAG	7.4	5.059	7.064	5.167	7.269	6.614	6.752	6.488	6.878	5.24	6.876	5.77	8	-0.0339	NON-ANTIGEN
335	LCPFGEVFN	7.968	4.822	7.053	5.284	7.208	6.974	7.067	7.964	6.865	5.279	6.736	4.344	8	-0.0363	NON-ANTIGEN
320	VQPTESIVR	6.786	5.868	7.421	6.322	7.489	6.755	6.886	6.924	6.958	5.541	6.617	5.112	9	-0.0418	NON-ANTIGEN
474	QAGSTPCNG	0	0	0	0	0	0	0	0	0	0	0	0	0	-0.0482	NON-ANTIGEN
911	VTQNVLYEN	4.468	4.325	5.76	4.614	5.783	4.771	5.548	4.954	5.614	4.67	5.66	3.852	0	-0.049	NON-ANTIGEN
1248	CSCGSCCKF	0	0	0	0	0	0	0	0	0	0	0	0	0	-0.0512	NON-ANTIGEN
25	PPAYTNSFT	0	0	0	0	0	0	0	0	0	0	0	0	0	-0.0539	NON-ANTIGEN
812	PSKRSFIED	0	0	0	0	0	0	0	0	0	0	0	0	0	-0.0547	NON-ANTIGEN
397	ADSFVIRGD	0	0	0	0	0	0	0	0	0	0	0	0	0	-0.0575	NON-ANTIGEN
1001	LQSLQTYVT	8.041	4.398	6.469	4.627	6.489	6.778	6.178	7.098	6.156	4.145	6.084	4.876	5	-0.0592	NON-ANTIGEN
678	TNSPRRARS	0	0	0	0	0	0	0	0	0	0	0	0	0	-0.0598	NON-ANTIGEN
761	TQLNRALTG	0	0	0	0	0	0	0	0	0	0	0	0	0	-0.0605	NON-ANTIGEN
889	GAGAALQIP	0	0	0	0	0	0	0	0	0	0	0	0	0	-0.0643	NON-ANTIGEN
1048	HLMSFPQSA	0	0	0	0	0	0	0	0	0	0	0	0	0	-0.0681	NON-ANTIGEN
336	CPFGEVFNA	0	0	0	0	0	0	0	0	0	0	0	0	0	-0.071	NON-ANTIGEN
74	NGTKRFDNP	0	0	0	0	0	0	0	0	0	0	0	0	0	-0.0712	NON-ANTIGEN
1009	TQQLIRAAE	0	0	0	0	0	0	0	0	0	0	0	0	0	-0.0723	NON-ANTIGEN
999	GRLQSLQTY	0	0	0	0	0	0	0	0	0	0	0	0	0	-0.0743	NON-ANTIGEN
431	GCVIAWNSN	0	0	0	0	0	0	0	0	0	0	0	0	0	-0.0754	NON-ANTIGEN
157	FRVYSSANN	6.393	3.879	6.419	4.265	6.598	5.996	6.405	6.553	6.287	4.374	6.155	3.251	5	-0.0802	NON-ANTIGEN
86	FNDGVYFAS	6.721	4.446	7.005	4.718	6.869	6.907	6.174	6.782	6.453	4.083	6.673	5.105	7	-0.0829	NON-ANTIGEN
787	QIYKTPPIK	0	0	0	0	0	0	0	0	0	0	0	0	0	-0.0833	NON-ANTIGEN
910	GVTQNVLYE	0	0	0	0	0	0	0	0	0	0	0	0	0	-0.0902	NON-ANTIGEN
162	SANNCTFEY	0	0	0	0	0	0	0	0	0	0	0	0	0	-0.0924	NON-ANTIGEN
477	STPCNGVEG	0	0	0	0	0	0	0	0	0	0	0	0	0	-0.0959	NON-ANTIGEN
1028	KMSECVLGQ	0	0	0	0	0	0	0	0	0	0	0	0	0	-0.1017	NON-ANTIGEN
849	LICAQKFNG	7.507	4.618	6.693	4.837	6.603	6.689	6.27	6.639	6.338	4.558	6.498	5.523	7	-0.1029	NON-ANTIGEN
160	YSSANNCTF	6.836	4.583	5.4	4.651	5.38	6.643	4.977	5.677	5.085	4.107	5.563	6.28	2	-0.1036	NON-ANTIGEN
197	IDGYFKIYS	8.365	5.277	7.46	5.611	7.558	7.312	7.475	7.612	7.306	5.662	7.194	5.402	8	-0.1037	NON-ANTIGEN
365	YSVLYNSAS	7.157	4.753	5.726	5.03	5.91	6.049	5.461	6.72	5.435	4.824	5.336	5.029	2	-0.1049	NON-ANTIGEN
194	FKNIDGYFK	7.863	4.746	7.356	5.122	7.369	7.151	6.983	7.782	6.982	4.414	6.799	4.229	8	-0.1054	NON-ANTIGEN
806	LPDPSKPSK	5.496	3.535	5.698	3.834	5.65	4.997	5.602	5.491	5.572	3.542	6.015	3.598	0	-0.1058	NON-ANTIGEN
1011	QLIRAAEIR	0	0	0	0	0	0	0	0	0	0	0	0	0	-0.1101	NON-ANTIGEN
1180	QKEIDRLNE	0	0	0	0	0	0	0	0	0	0	0	0	0	-0.1119	NON-ANTIGEN
1051	SFPQSAPHG	0	0	0	0	0	0	0	0	0	0	0	0	0	-0.1127	NON-ANTIGEN
161	SSANNCTFE	0	0	0	0	0	0	0	0	0	0	0	0	0	-0.1175	NON-ANTIGEN
677	QTNSPRRAR	0	0	0	0	0	0	0	0	0	0	0	0	0	-0.118	NON-ANTIGEN
127	VIKVCEFQF	8.797	5.33	6.627	5.475	6.548	8.002	6.18	7.426	6.208	4.716	6.248	6.711	6	-0.1189	NON-ANTIGEN
925	NQFNSAIGK	0	0	0	0	0	0	0	0	0	0	0	0	0	-0.1202	NON-ANTIGEN
573	TDAVRDPQT	0	0	0	0	0	0	0	0	0	0	0	0	0	-0.1236	NON-ANTIGEN
1096	VSNGTHWFV	6.394	4.183	5.468	4.228	5.265	6.113	4.646	5.171	4.953	3.313	5.374	6.044	1	-0.1239	NON-ANTIGEN
523	TVCGPKKST	0	0	0	0	0	0	0	0	0	0	0	0	0	-0.125	NON-ANTIGEN
192	FVFKNIDGY	7.42	5.336	7.626	5.46	7.786	7.515	7.327	7.114	7.414	5.179	7.057	5.245	8	-0.1304	NON-ANTIGEN
1141	LQPELDSFK	7.085	5.964	8.036	6.242	8.224	7.059	7.728	7.174	7.828	5.923	7.786	5.581	8	-0.1311	NON-ANTIGEN
345	TRFASVYAW	0	0	0	0	0	0	0	0	0	0	0	0	0	-0.1315	NON-ANTIGEN
521	PATVCGPKK	0	0	0	0	0	0	0	0	0	0	0	0	0	-0.1327	NON-ANTIGEN
834	IKQYGDCLG	7.625	4.476	6.512	4.622	6.541	6.568	6.542	6.676	6.439	4.789	6.712	5.326	8	-0.1337	NON-ANTIGEN
837	YGDCLGDIA	5.572	4.202	5.171	4.354	5.192	5.58	4.798	4.739	4.962	4.224	5.922	5.562	0	-0.134	NON-ANTIGEN
1232	IMLCCMTSC	6.406	3.633	5.861	3.918	6.025	6.325	5.523	5.955	5.622	4.143	6.288	4.684	2	-0.1341	NON-ANTIGEN
211	NLVRDLPQG	0	0	0	0	0	0	0	0	0	0	0	0	0	-0.1343	NON-ANTIGEN
636	YSTGSNVFQ	6.503	5.785	6.912	6.169	6.992	6.719	6.061	6.584	6.325	5.414	6.382	5.967	7	-0.1347	NON-ANTIGEN
423	YKLPDDFTG	6.965	4.886	5.831	5.076	5.74	5.835	5.768	5.882	5.7	5.136	6.163	6.01	1	-0.1362	NON-ANTIGEN
883	TSGWTFGAG	0	0	0	0	0	0	0	0	0	0	0	0	0	-0.1372	NON-ANTIGEN
1254	CKFDEDDSE	0	0	0	0	0	0	0	0	0	0	0	0	0	-0.1379	NON-ANTIGEN
324	ESIVRFPNI	0	0	0	0	0	0	0	0	0	0	0	0	0	-0.1429	NON-ANTIGEN
1049	LMSFPQSAP	7.612	3.584	5.613	3.821	5.803	6.502	5.611	6.789	5.472	3.849	5.611	4.276	3	-0.143	NON-ANTIGEN
1078	APAICHDGK	0	0	0	0	0	0	0	0	0	0	0	0	0	-0.1432	NON-ANTIGEN
1080	AICHDGKAH	0	0	0	0	0	0	0	0	0	0	0	0	0	-0.1461	NON-ANTIGEN
448	NYNYLYRLF	0	0	0	0	0	0	0	0	0	0	0	0	0	-0.148	NON-ANTIGEN
802	FSQILPDPS	7.173	3.504	5.934	3.698	6.024	6.23	5.608	6.99	5.652	3.439	5.685	3.895	2	-0.1489	NON-ANTIGEN
125	NVVIKVCEF	0	0	0	0	0	0	0	0	0	0	0	0	0	-0.1492	NON-ANTIGEN
339	GEVFNATRF	0	0	0	0	0	0	0	0	0	0	0	0	0	-0.1511	NON-ANTIGEN
499	PTNGVGYQP	0	0	0	0	0	0	0	0	0	0	0	0	0	-0.1526	NON-ANTIGEN
1121	FVSGNCDVV	6.823	3.579	5.888	3.59	5.915	6.751	5.017	5.616	5.392	2.781	5.905	5.439	2	-0.1537	NON-ANTIGEN
790	KTPPIKDFG	0	0	0	0	0	0	0	0	0	0	0	0	0	-0.1546	NON-ANTIGEN
195	KNIDGYFKI	0	0	0	0	0	0	0	0	0	0	0	0	0	-0.1618	NON-ANTIGEN
918	ENQKLIANQ	0	0	0	0	0	0	0	0	0	0	0	0	0	-0.162	NON-ANTIGEN
126	VVIKVCEFQ	7.246	6.599	7.864	6.801	8.116	7.058	7.595	7.241	7.668	6.621	7.084	5.9	11	-0.1622	NON-ANTIGEN
803	SQILPDPSK	0	0	0	0	0	0	0	0	0	0	0	0	0	-0.1627	NON-ANTIGEN
977	LNDILSRLD	7.33	4.556	6.727	4.896	6.977	6.566	6.366	7.834	6.418	4.796	5.998	3.851	7	-0.1643	NON-ANTIGEN
850	ICAQKFNGL	8.631	5.454	7.315	5.412	7.471	7.876	7.014	6.983	7.128	5.051	7.189	6.88	9	-0.1645	NON-ANTIGEN
360	NCVADYSVL	0	0	0	0	0	0	0	0	0	0	0	0	0	-0.1679	NON-ANTIGEN
427	DDFTGCVIA	0	0	0	0	0	0	0	0	0	0	0	0	0	-0.1687	NON-ANTIGEN
742	ICGDSTECS	5.86	4.227	6.348	4.418	6.513	5.873	6.09	5.428	6.217	4.562	6.617	4.699	3	-0.1721	NON-ANTIGEN
54	LFLPFFSNV	8.093	4.09	6.002	4.179	6.161	6.811	5.89	6.13	5.87	3.991	6.44	5.914	3	-0.1776	NON-ANTIGEN
674	YQTQTNSPR	5.763	5.697	6.679	6.005	6.885	5.652	6.388	6.009	6.455	5.607	6.207	4.982	4	-0.1787	NON-ANTIGEN
574	DAVRDPQTL	0	0	0	0	0	0	0	0	0	0	0	0	0	-0.1803	NON-ANTIGEN
864	LLTDEMIAQ	6.34	4.908	7.074	5.264	7.123	6.375	6.856	6.005	6.875	5.141	7.153	5.011	7	-0.182	NON-ANTIGEN
188	NLREFVFKN	0	0	0	0	0	0	0	0	0	0	0	0	0	-0.185	NON-ANTIGEN
30	NSFTRGVYY	0	0	0	0	0	0	0	0	0	0	0	0	0	-0.1877	NON-ANTIGEN
1005	QTYVTQQLI	0	0	0	0	0	0	0	0	0	0	0	0	0	-0.1881	NON-ANTIGEN
359	SNCVADYSV	0	0	0	0	0	0	0	0	0	0	0	0	0	-0.1927	NON-ANTIGEN
1098	NGTHWFVTQ	0	0	0	0	0	0	0	0	0	0	0	0	0	-0.1937	NON-ANTIGEN
1008	VTQQLIRAA	7.089	5.352	6.581	5.471	6.859	6.366	6.239	6.124	6.362	5.344	6.047	5.663	5	-0.1943	NON-ANTIGEN
475	AGSTPCNGV	0	0	0	0	0	0	0	0	0	0	0	0	0	-0.1944	NON-ANTIGEN
1242	SCLKGCCSC	0	0	0	0	0	0	0	0	0	0	0	0	0	-0.1961	NON-ANTIGEN
36	VYYPDKVFR	6.7	5.177	6.721	5.613	6.845	6.036	6.615	6.508	6.532	5.28	6.721	4.903	7	-0.1968	NON-ANTIGEN
306	FTVEKGIYQ	7.398	5.498	8.07	5.903	8.148	7.591	7.711	7.047	7.738	5.575	7.619	5.132	8	-0.1987	NON-ANTIGEN
1029	MSECVLGQS	5.862	3.993	5.474	4.356	5.689	5.685	5.116	5.204	5.195	4.341	5.932	4.903	0	-0.1998	NON-ANTIGEN
1251	GSCCKFDED	0	0	0	0	0	0	0	0	0	0	0	0	0	-0.2048	NON-ANTIGEN
1004	LQTYVTQQL	9.117	5.007	6.849	5.06	7.075	7.739	6.814	6.971	6.745	4.856	6.831	6.368	9	-0.2061	NON-ANTIGEN
564	QFGRDIADT	0	0	0	0	0	0	0	0	0	0	0	0	0	-0.2066	NON-ANTIGEN
38	YPDKVFRSS	6.709	5.977	6.77	6.111	7.089	5.979	6.497	6.342	6.592	6.126	5.856	5.565	6	-0.2068	NON-ANTIGEN
1000	RLQSLQTYV	0	0	0	0	0	0	0	0	0	0	0	0	0	-0.2167	NON-ANTIGEN
988	EAEVQIDRL	0	0	0	0	0	0	0	0	0	0	0	0	0	-0.2206	NON-ANTIGEN
805	ILPDPSKPS	6.491	4.724	6.822	4.899	7.069	6.229	6.574	5.949	6.71	5.079	6.929	5.095	6	-0.2217	NON-ANTIGEN
1079	PAICHDGKA	0	0	0	0	0	0	0	0	0	0	0	0	0	-0.2241	NON-ANTIGEN
838	GDCLGDIAA	0	0	0	0	0	0	0	0	0	0	0	0	0	-0.2246	NON-ANTIGEN
956	AQALNTLVK	0	0	0	0	0	0	0	0	0	0	0	0	0	-0.2279	NON-ANTIGEN
426	PDDFTGCVI	0	0	0	0	0	0	0	0	0	0	0	0	0	-0.2306	NON-ANTIGEN
101	IRGWIFGTT	7.88	3.606	5.716	3.905	6.035	6.073	5.95	6.403	5.68	4.01	5.795	4.197	2	-0.2311	NON-ANTIGEN
465	ERDISTEIY	0	0	0	0	0	0	0	0	0	0	0	0	0	-0.2317	NON-ANTIGEN
395	VYADSFVIR	6.02	5.663	7.161	6.055	7.287	6.04	6.95	5.982	6.979	5.781	7.189	5.356	5	-0.2347	NON-ANTIGEN
1097	SNGTHWFVT	0	0	0	0	0	0	0	0	0	0	0	0	0	-0.2355	NON-ANTIGEN
524	VCGPKKSTN	5.069	3.683	5.167	4.036	5.326	4.754	5.05	5.358	5.03	4.138	5.34	3.565	0	-0.2379	NON-ANTIGEN
222	ALEPLVDLP	0	0	0	0	0	0	0	0	0	0	0	0	0	-0.238	NON-ANTIGEN
685	RSVASQSII	0	0	0	0	0	0	0	0	0	0	0	0	0	-0.2412	NON-ANTIGEN
123	ATNVVIKVC	0	0	0	0	0	0	0	0	0	0	0	0	0	-0.2416	NON-ANTIGEN
1143	PELDSFKEE	0	0	0	0	0	0	0	0	0	0	0	0	0	-0.2446	NON-ANTIGEN
196	NIDGYFKIY	0	0	0	0	0	0	0	0	0	0	0	0	0	-0.2462	NON-ANTIGEN
522	ATVCGPKKS	0	0	0	0	0	0	0	0	0	0	0	0	0	-0.2471	NON-ANTIGEN
133	FQFCNDPFL	6.289	2.479	4.801	2.501	4.703	5.772	4.518	4.593	4.624	2.127	5.688	4.865	0	-0.2493	NON-ANTIGEN
813	SKRSFIEDL	0	0	0	0	0	0	0	0	0	0	0	0	0	-0.2519	NON-ANTIGEN
741	YICGDSTEC	5.939	4.747	5.802	5.054	5.972	6.406	4.906	5.88	5.216	4.729	5.332	5.387	1	-0.2526	NON-ANTIGEN
403	RGDEVRQIA	0	0	0	0	0	0	0	0	0	0	0	0	0	-0.2528	NON-ANTIGEN
1236	CMTSCCSCL	0	0	0	0	0	0	0	0	0	0	0	0	0	-0.2528	NON-ANTIGEN
1154	KYFKNHTSP	0	0	0	0	0	0	0	0	0	0	0	0	0	-0.2601	NON-ANTIGEN
676	TQTNSPRRA	0	0	0	0	0	0	0	0	0	0	0	0	0	-0.2615	NON-ANTIGEN
518	LHAPATVCG	8.065	4.578	6.691	4.891	6.815	6.923	6.557	6.634	6.474	4.948	6.815	5.515	8	-0.2712	NON-ANTIGEN
428	DFTGCVIAW	0	0	0	0	0	0	0	0	0	0	0	0	0	-0.2714	NON-ANTIGEN
817	FIEDLLFNK	5.246	3.959	6.526	4.285	6.436	5.411	6.309	5.212	6.353	3.979	6.705	3.845	5	-0.2768	NON-ANTIGEN
1007	YVTQQLIRA	7.867	6.396	7.338	6.676	7.433	7.388	7.028	6.813	7.021	6.413	6.819	6.788	12	-0.2814	NON-ANTIGEN
957	QALNTLVKQ	0	0	0	0	0	0	0	0	0	0	0	0	0	-0.2817	NON-ANTIGEN
562	FQQFGRDIA	7.548	3.296	5.639	3.416	5.741	6.083	5.65	6.638	5.56	3.386	5.838	4.224	2	-0.2818	NON-ANTIGEN
816	SFIEDLLFN	0	0	0	0	0	0	0	0	0	0	0	0	0	-0.2828	NON-ANTIGEN
454	RLFRKSNLK	0	0	0	0	0	0	0	0	0	0	0	0	0	-0.2829	NON-ANTIGEN
124	TNVVIKVCE	0	0	0	0	0	0	0	0	0	0	0	0	0	-0.3047	NON-ANTIGEN
520	APATVCGPK	0	0	0	0	0	0	0	0	0	0	0	0	0	-0.306	NON-ANTIGEN
635	VYSTGSNVF	6.402	3.913	5.093	3.943	5.221	6.153	4.538	5.189	4.733	3.351	4.784	5.188	1	-0.3099	NON-ANTIGEN
962	LVKQLSSNF	8.84	5.763	7.628	5.852	7.834	8.563	7.305	7.35	7.372	5.5	7.375	6.892	9	-0.3212	NON-ANTIGEN
1077	TAPAICHDG	0	0	0	0	0	0	0	0	0	0	0	0	0	-0.3229	NON-ANTIGEN
235	ITRFQTLLA	8.558	4.244	6.438	4.562	6.506	7.095	6.43	7.197	6.228	4.393	6.279	4.897	6	-0.3233	NON-ANTIGEN
37	YYPDKVFRS	5.689	5.266	6.287	5.534	6.197	5.815	6.056	5.235	6.101	5.536	6.524	5.744	1	-0.3237	NON-ANTIGEN
519	HAPATVCGP	0	0	0	0	0	0	0	0	0	0	0	0	0	-0.3251	NON-ANTIGEN
973	ISSVLNDIL	7.457	3.202	5.145	3.202	5.229	6.385	4.683	5.933	4.807	2.531	4.999	4.888	2	-0.3334	NON-ANTIGEN
1002	QSLQTYVTQ	0	0	0	0	0	0	0	0	0	0	0	0	0	-0.3361	NON-ANTIGEN
42	VFRSSVLHS	6.52	5.072	6.558	5.426	6.59	6.469	6.052	6.045	6.149	5.116	6.232	5.37	4	-0.3392	NON-ANTIGEN
1006	TYVTQQLIR	0	0	0	0	0	0	0	0	0	0	0	0	0	-0.3417	NON-ANTIGEN
429	FTGCVIAWN	6.25	4.202	6.865	4.611	6.943	6.528	6.517	6.547	6.609	4.567	7.254	4.365	7	-0.3448	NON-ANTIGEN
159	VYSSANNCT	5.757	4.303	5.578	4.403	5.682	5.359	5.107	5.174	5.316	4.071	5.58	5.119	0	-0.3459	NON-ANTIGEN
1187	NEVAKNLNE	0	0	0	0	0	0	0	0	0	0	0	0	0	-0.3505	NON-ANTIGEN
466	RDISTEIYQ	0	0	0	0	0	0	0	0	0	0	0	0	0	-0.3536	NON-ANTIGEN
675	QTQTNSPRR	0	0	0	0	0	0	0	0	0	0	0	0	0	-0.358	NON-ANTIGEN
463	PFERDISTE	0	0	0	0	0	0	0	0	0	0	0	0	0	-0.3596	NON-ANTIGEN
832	GFIKQYGDC	0	0	0	0	0	0	0	0	0	0	0	0	0	-0.3601	NON-ANTIGEN
1120	TFVSGNCDV	0	0	0	0	0	0	0	0	0	0	0	0	0	-0.3608	NON-ANTIGEN
1177	VNIQKEIDR	5.934	5.308	6.787	5.715	6.882	5.781	6.503	5.995	6.496	5.212	6.14	4.486	4	-0.3611	NON-ANTIGEN
1233	MLCCMTSCC	5.823	4.018	5.451	4.286	5.56	5.984	5.097	5.472	5.213	4.495	6.002	5.1	0	-0.3648	NON-ANTIGEN
158	RVYSSANNC	0	0	0	0	0	0	0	0	0	0	0	0	0	-0.3658	NON-ANTIGEN
53	DLFLPFFSN	0	0	0	0	0	0	0	0	0	0	0	0	0	-0.368	NON-ANTIGEN
478	TPCNGVEGF	0	0	0	0	0	0	0	0	0	0	0	0	0	-0.3772	NON-ANTIGEN
1142	QPELDSFKE	0	0	0	0	0	0	0	0	0	0	0	0	0	-0.3881	NON-ANTIGEN
1240	CCSCLKGCC	0	0	0	0	0	0	0	0	0	0	0	0	0	-0.3925	NON-ANTIGEN
1239	SCCSCLKGC	0	0	0	0	0	0	0	0	0	0	0	0	0	-0.3984	NON-ANTIGEN
401	VIRGDEVRQ	5.802	4.678	6.229	5.077	6.309	6.064	5.364	5.852	5.628	4.308	5.685	4.829	1	-0.3993	NON-ANTIGEN
29	TNSFTRGVY	0	0	0	0	0	0	0	0	0	0	0	0	0	-0.404	NON-ANTIGEN
804	QILPDPSKP	0	0	0	0	0	0	0	0	0	0	0	0	0	-0.409	NON-ANTIGEN
462	KPFERDIST	0	0	0	0	0	0	0	0	0	0	0	0	0	-0.4114	NON-ANTIGEN
452	LYRLFRKSN	6.499	3.651	5.786	3.973	6.057	5.441	5.507	6.825	5.524	3.816	5.123	3.068	2	-0.4153	NON-ANTIGEN
95	TEKSNIIRG	0	0	0	0	0	0	0	0	0	0	0	0	0	-0.4163	NON-ANTIGEN
1179	IQKEIDRLN	6.816	5.697	7.823	5.916	8.084	6.762	7.511	7.321	7.668	5.98	7.382	5.072	8	-0.4173	NON-ANTIGEN
833	FIKQYGDCL	8.034	4.694	6.908	4.702	7.027	7.724	6.552	6.325	6.668	4.278	6.82	5.997	8	-0.4436	NON-ANTIGEN
234	NITRFQTLL	0	0	0	0	0	0	0	0	0	0	0	0	0	-0.4572	NON-ANTIGEN
189	LREFVFKNI	9.657	4.448	6.273	4.467	6.55	7.438	6.271	7.274	6.176	4.227	6.262	6.152	4	-0.4605	NON-ANTIGEN
959	LNTLVKQLS	7.962	4.456	6.523	4.709	6.723	6.689	6.24	7.486	6.24	4.505	6.049	4.659	5	-0.4635	NON-ANTIGEN
561	PFQQFGRDI	0	0	0	0	0	0	0	0	0	0	0	0	0	-0.4674	NON-ANTIGEN
974	SSVLNDILS	0	0	0	0	0	0	0	0	0	0	0	0	0	-0.4692	NON-ANTIGEN
978	NDILSRLDK	0	0	0	0	0	0	0	0	0	0	0	0	0	-0.4748	NON-ANTIGEN
210	INLVRDLPQ	7.744	4.768	7.043	5.148	7.092	7.024	6.603	7.603	6.614	4.547	6.356	4.624	8	-0.4749	NON-ANTIGEN
1234	LCCMTSCCS	6.772	3.943	6.039	4.212	6.044	6.306	5.795	6.48	5.773	4.027	5.973	4.312	3	-0.4779	NON-ANTIGEN
831	AGFIKQYGD	0	0	0	0	0	0	0	0	0	0	0	0	0	-0.4781	NON-ANTIGEN
919	NQKLIANQF	0	0	0	0	0	0	0	0	0	0	0	0	0	-0.4784	NON-ANTIGEN
740	MYICGDSTE	4.59	3.503	4.973	3.808	5.081	4.589	4.668	4.742	4.784	3.783	5.487	3.961	0	-0.4787	NON-ANTIGEN
563	QQFGRDIAD	0	0	0	0	0	0	0	0	0	0	0	0	0	-0.4794	NON-ANTIGEN
273	RTFLLKYNE	0	0	0	0	0	0	0	0	0	0	0	0	0	-0.4873	NON-ANTIGEN
1085	GKAHFPREG	0	0	0	0	0	0	0	0	0	0	0	0	0	-0.4907	NON-ANTIGEN
851	CAQKFNGLT	0	0	0	0	0	0	0	0	0	0	0	0	0	-0.5055	NON-ANTIGEN
402	IRGDEVRQI	8.281	5.095	7	5.065	7.233	7.504	6.732	6.08	6.88	4.891	7.289	6.888	8	-0.5067	NON-ANTIGEN
1246	GCCSCGSCC	0	0	0	0	0	0	0	0	0	0	0	0	0	-0.5114	NON-ANTIGEN
991	VQIDRLITG	6.82	5.229	6.613	5.495	6.662	6.335	6.384	5.585	6.402	5.583	6.781	6.163	7	-0.514	NON-ANTIGEN
187	KNLREFVFK	0	0	0	0	0	0	0	0	0	0	0	0	0	-0.5146	NON-ANTIGEN
961	TLVKQLSSN	0	0	0	0	0	0	0	0	0	0	0	0	0	-0.5178	NON-ANTIGEN
1119	NTFVSGNCD	0	0	0	0	0	0	0	0	0	0	0	0	0	-0.5353	NON-ANTIGEN
357	RISNCVADY	0	0	0	0	0	0	0	0	0	0	0	0	0	-0.5375	NON-ANTIGEN
1086	KAHFPREGV	0	0	0	0	0	0	0	0	0	0	0	0	0	-0.5521	NON-ANTIGEN
1150	EELDKYFKN	0	0	0	0	0	0	0	0	0	0	0	0	0	-0.5532	NON-ANTIGEN
321	QPTESIVRF	0	0	0	0	0	0	0	0	0	0	0	0	0	-0.5551	NON-ANTIGEN
271	QPRTFLLKY	0	0	0	0	0	0	0	0	0	0	0	0	0	-0.5552	NON-ANTIGEN
989	AEVQIDRLI	0	0	0	0	0	0	0	0	0	0	0	0	0	-0.5562	NON-ANTIGEN
394	NVYADSFVI	0	0	0	0	0	0	0	0	0	0	0	0	0	-0.5617	NON-ANTIGEN
27	AYTNSFTRG	0	0	0	0	0	0	0	0	0	0	0	0	0	-0.5622	NON-ANTIGEN
392	FTNVYADSF	8.323	3.965	6.267	4.026	6.351	7.72	5.768	7.081	5.892	3.367	6.06	5.382	4	-0.5651	NON-ANTIGEN
425	LPDDFTGCV	8.307	5.27	7.21	5.436	7.478	7.86	6.945	6.239	7.001	5.273	7.556	6.909	8	-0.5655	NON-ANTIGEN
958	ALNTLVKQL	0	0	0	0	0	0	0	0	0	0	0	0	0	-0.5716	NON-ANTIGEN
100	IIRGWIFGT	6.28	4.012	6.273	4.284	6.137	6.375	5.396	5.729	5.675	3.419	5.94	4.87	1	-0.5765	NON-ANTIGEN
815	RSFIEDLLF	0	0	0	0	0	0	0	0	0	0	0	0	0	-0.5782	NON-ANTIGEN
424	KLPDDFTGC	0	0	0	0	0	0	0	0	0	0	0	0	0	-0.5952	NON-ANTIGEN
272	PRTFLLKYN	0	0	0	0	0	0	0	0	0	0	0	0	0	-0.6063	NON-ANTIGEN
791	TPPIKDFGG	0	0	0	0	0	0	0	0	0	0	0	0	0	-0.6128	NON-ANTIGEN
792	PPIKDFGGF	0	0	0	0	0	0	0	0	0	0	0	0	0	-0.6138	NON-ANTIGEN
990	EVQIDRLIT	0	0	0	0	0	0	0	0	0	0	0	0	0	-0.6152	NON-ANTIGEN
28	YTNSFTRGV	7.804	5.679	6.462	5.711	6.689	6.939	5.939	6.007	6.157	5.261	6.285	7.102	5	-0.6177	NON-ANTIGEN
451	YLYRLFRKS	6.768	6.048	6.816	6.174	7.152	5.944	6.649	6.344	6.695	6.281	5.883	5.529	6	-0.6217	NON-ANTIGEN
1151	ELDKYFKNH	0	0	0	0	0	0	0	0	0	0	0	0	0	-0.6285	NON-ANTIGEN
921	KLIANQFNS	0	0	0	0	0	0	0	0	0	0	0	0	0	-0.6286	NON-ANTIGEN
920	QKLIANQFN	0	0	0	0	0	0	0	0	0	0	0	0	0	-0.6305	NON-ANTIGEN
1153	DKYFKNHTS	0	0	0	0	0	0	0	0	0	0	0	0	0	-0.6311	NON-ANTIGEN
358	ISNCVADYS	5.564	3.42	5.608	3.602	5.629	5.562	5.266	5.31	5.43	3.602	6.329	4.435	1	-0.6338	NON-ANTIGEN
40	DKVFRSSVL	0	0	0	0	0	0	0	0	0	0	0	0	0	-0.6396	NON-ANTIGEN
793	PIKDFGGFN	0	0	0	0	0	0	0	0	0	0	0	0	0	-0.6421	NON-ANTIGEN
814	KRSFIEDLL	0	0	0	0	0	0	0	0	0	0	0	0	0	-0.6422	NON-ANTIGEN
1152	LDKYFKNHT	7.214	4.259	6.187	4.375	6.346	5.982	6.183	6.266	6.136	4.353	6.212	4.798	2	-0.6449	NON-ANTIGEN
323	TESIVRFPN	0	0	0	0	0	0	0	0	0	0	0	0	0	-0.6508	NON-ANTIGEN
94	STEKSNIIR	0	0	0	0	0	0	0	0	0	0	0	0	0	-0.6677	NON-ANTIGEN
129	KVCEFQFCN	0	0	0	0	0	0	0	0	0	0	0	0	0	-0.6728	NON-ANTIGEN
1144	ELDSFKEEL	0	0	0	0	0	0	0	0	0	0	0	0	0	-0.6805	NON-ANTIGEN
994	DRLITGRLQ	0	0	0	0	0	0	0	0	0	0	0	0	0	-0.6873	NON-ANTIGEN
393	TNVYADSFV	0	0	0	0	0	0	0	0	0	0	0	0	0	-0.6911	NON-ANTIGEN
41	KVFRSSVLH	0	0	0	0	0	0	0	0	0	0	0	0	0	-0.6913	NON-ANTIGEN
1235	CCMTSCCSC	0	0	0	0	0	0	0	0	0	0	0	0	0	-0.6916	NON-ANTIGEN
26	PAYTNSFTR	0	0	0	0	0	0	0	0	0	0	0	0	0	-0.7122	NON-ANTIGEN
131	CEFQFCNDP	0	0	0	0	0	0	0	0	0	0	0	0	0	-0.7193	NON-ANTIGEN
736	VDCTMYICG	7.636	5.389	6.759	5.659	6.826	6.775	6.254	6.685	6.327	5.328	6.138	6.035	6	-0.7197	NON-ANTIGEN
975	SVLNDILSR	0	0	0	0	0	0	0	0	0	0	0	0	0	-0.7223	NON-ANTIGEN
39	PDKVFRSSV	0	0	0	0	0	0	0	0	0	0	0	0	0	-0.7314	NON-ANTIGEN
464	FERDISTEI	9.357	5.736	7.99	5.801	8.206	8.758	7.747	7.107	7.822	5.595	8.328	7.61	9	-0.7442	NON-ANTIGEN
739	TMYICGDST	0	0	0	0	0	0	0	0	0	0	0	0	0	-0.748	NON-ANTIGEN
960	NTLVKQLSS	0	0	0	0	0	0	0	0	0	0	0	0	0	-0.7505	NON-ANTIGEN
995	RLITGRLQS	0	0	0	0	0	0	0	0	0	0	0	0	0	-0.7565	NON-ANTIGEN
193	VFKNIDGYF	7.491	5.116	6.294	5.239	6.588	7.215	6.096	5.843	6.121	5.093	6.405	6.538	5	-0.7572	NON-ANTIGEN
1145	LDSFKEELD	6.9	4.092	6.237	4.424	6.432	6.06	6.238	7.326	6.134	4.647	6.091	3.638	3	-0.7608	NON-ANTIGEN
1178	NIQKEIDRL	0	0	0	0	0	0	0	0	0	0	0	0	0	-0.8082	NON-ANTIGEN
1084	DGKAHFPRE	0	0	0	0	0	0	0	0	0	0	0	0	0	-0.8213	NON-ANTIGEN
976	VLNDILSRL	7.576	5.326	6.513	5.384	6.673	7.183	6.263	5.635	6.355	5.172	6.964	7.147	7	-0.8524	NON-ANTIGEN
450	NYLYRLFRK	0	0	0	0	0	0	0	0	0	0	0	0	0	-0.8611	NON-ANTIGEN
99	NIIRGWIFG	0	0	0	0	0	0	0	0	0	0	0	0	0	-0.8636	NON-ANTIGEN
449	YNYLYRLFR	7.619	5.887	7.024	6.331	7.086	6.575	6.772	7.611	6.682	5.666	6.391	5.3	9	-0.8692	NON-ANTIGEN
128	IKVCEFQFC	6.473	3.862	6.032	4.055	6.157	6.319	5.711	6.196	5.853	4.317	6.55	4.989	3	-0.901	NON-ANTIGEN
1241	CSCLKGCCS	0	0	0	0	0	0	0	0	0	0	0	0	0	-0.9354	NON-ANTIGEN
1083	HDGKAHFPR	0	0	0	0	0	0	0	0	0	0	0	0	0	-0.9729	NON-ANTIGEN
322	PTESIVRFP	0	0	0	0	0	0	0	0	0	0	0	0	0	-0.9941	NON-ANTIGEN
96	EKSNIIRGW	0	0	0	0	0	0	0	0	0	0	0	0	0	-1.0205	NON-ANTIGEN
98	SNIIRGWIF	0	0	0	0	0	0	0	0	0	0	0	0	0	-1.0471	NON-ANTIGEN
992	QIDRLITGR	0	0	0	0	0	0	0	0	0	0	0	0	0	-1.0567	NON-ANTIGEN
1149	KEELDKYFK	0	0	0	0	0	0	0	0	0	0	0	0	0	-1.1128	NON-ANTIGEN
130	VCEFQFCND	5.265	3.305	4.799	3.669	4.809	4.748	4.817	5.864	4.67	3.819	4.871	3.044	0	-1.2517	NON-ANTIGEN
1147	SFKEELDKY	0	0	0	0	0	0	0	0	0	0	0	0	0	-1.3338	NON-ANTIGEN
993	IDRLITGRL	10.033	4.923	6.986	5.148	7.277	8.649	6.666	7.854	6.602	4.563	6.651	6.369	9	-1.346	NON-ANTIGEN
737	DCTMYICGD	0	0	0	0	0	0	0	0	0	0	0	0	0	-1.5371	NON-ANTIGEN
1148	FKEELDKYF	8.151	4.832	7.015	4.821	7.29	7.592	6.701	6.673	6.845	4.585	6.826	6.071	8	-1.5561	NON-ANTIGEN
97	KSNIIRGWI	0	0	0	0	0	0	0	0	0	0	0	0	0	-1.6883	NON-ANTIGEN
738	CTMYICGDS	0	0	0	0	0	0	0	0	0	0	0	0	0	-1.7389	NON-ANTIGEN
1146	DSFKEELDK	0	0	0	0	0	0	0	0	0	0	0	0	0	-1.8252	NON-ANTIGEN
